# Supplementary material for: Halohydroxylation of alkenyl MIDA boronates: switchable stereoselectivity induced by B(MIDA) substituent
Source: Royal Society of Chemistry journal article supplement (doi:10.1039/d0cc00722f), 2020-01-01

# Halohydroxylation of Alkenyl MIDA Boronates: Switchable Stereoselectivity Induced by B(MIDA) Substituent

Yao-Fu Zeng,<sup>\*a</sup> Xu-Ge Liu,<sup>b</sup> Dong-Hang Tan,<sup>b</sup> Wen-Xin Fan,<sup>b</sup> Yi-Na Li,<sup>a</sup> Yu Guo,<sup>a</sup> and Honggen Wang<sup>\*b</sup>

<sup>a</sup>*Institute of Pharmacy and Pharmacology, Hunan Provincial Key Laboratory of tumor microenvironment responsive drug research, University of South China, Hengyang, 421001, P. R. China*

<sup>b</sup>*School of Pharmaceutical Sciences, Sun Yat-sen University, Guangzhou, 510006, P. R. China*

## Supporting Information

### Contents

|                                                                              |    |
|------------------------------------------------------------------------------|----|
| 1. General information.....                                                  | 2  |
| 2. General procedure for the synthesis of $\alpha$ -boryl chlorohydrins..... | 3  |
| 3. General procedure for the synthesis of $\alpha$ -boryl bromohydrins.....  | 3  |
| 4. General procedure for the synthesis of $\alpha$ -boryl iodohydrins.....   | 3  |
| 5. Synthesis of $\alpha$ -boryl iodoether and iodoester.....                 | 4  |
| 6. Exploring the tolerance of the (Z)-alkenyl MIDA boronate .....            | 5  |
| 7. Derivatization of the products.....                                       | 6  |
| 8. Characterization of the products .....                                    | 7  |
| 9. X-ray crystal structure data of compounds 3b and 4e.....                  | 24 |
| 10. NMR spectrum of products.....                                            | 36 |

## 1. General information

The solvents were obtained from commercial suppliers and used without further purification unless otherwise stated. Proton ( $^1\text{H}$ ) and Carbon NMR ( $^{13}\text{C}$ ) were recorded at 400 MHz (500 MHz) and 101 MHz (126 MHz) NMR spectrometer, respectively. The following abbreviations are used for the multiplicities: s: singlet, d: doublet, t: triplet, q: quartet, m: multiplet, br s: broad singlet for proton spectra. Coupling constants ( $J$ ) are reported in Hertz (Hz). High-resolution mass spectra (HRMS) were recorded on a BRUKER VPEXII spectrometer with EI and ESI mode unless otherwise stated.

Analytical thin layer chromatography was performed on Polygram SIL G/UV<sub>254</sub> plates. Visualization was accomplished with short wave UV light, or  $\text{KMnO}_4$  staining solutions followed by heating. Flash column chromatography was performed using silica gel (200-300 mesh) with solvents distilled prior to use.

## 2. General procedure for the synthesis of $\alpha$ -boryl chlorohydrins

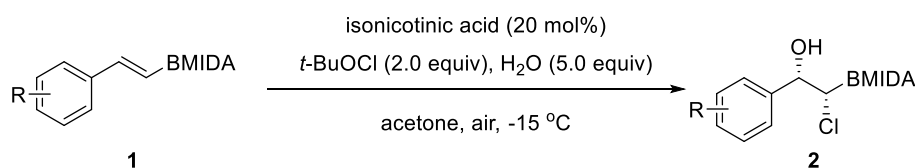

To a solution of alkenyl *N*-methyliminodiacetic (MIDA) boronate (0.3 mmol, 1.0 equiv) and isonicotinic acid (0.2 equiv) in acetone (2.5 mL) at -15 °C was added *t*-BuOCl (0.6 mmol, 2.0 equiv) and H<sub>2</sub>O (1.5 mmol, 5.0 equiv). The reaction was stirred at -15 °C under air for 3 - 5 h and then 1 M HCl (5.0 mL) was added. The reaction mixture was extracted with EtOAc/acetone (10:1) for three times. The combined organic phase was dried over anhydrous Na<sub>2</sub>SO<sub>4</sub> and concentrated under reduced pressure. The resulting crude product was purified by flash chromatography on silica gel with a mixture of petroleum ether and acetone as eluent or recrystallized from EtOAc.

## 3. General procedure for the synthesis of $\alpha$ -boryl bromohydrins

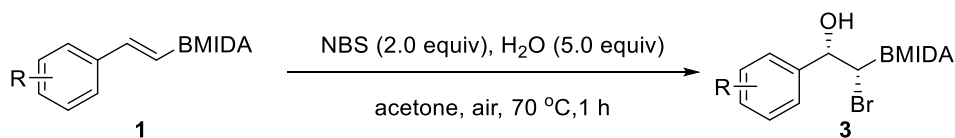

To a solution of alkenyl *N*-methyliminodiacetic (MIDA) boronate (0.3 mmol, 1.0 equiv) in acetone (2.5 mL) was added NBS (0.6 mmol, 2.0 equiv) and H<sub>2</sub>O (1.5 mmol, 5.0 equiv). The reaction was stirred at 70 °C under air for 1 h and then concentrated under reduced pressure. The resulting crude product was purified by flash chromatography on silica gel with a mixture of petroleum ether and acetone as eluent or recrystallized from EtOAc.

## 4. General procedure for the synthesis of $\alpha$ -boryl iodohydrins

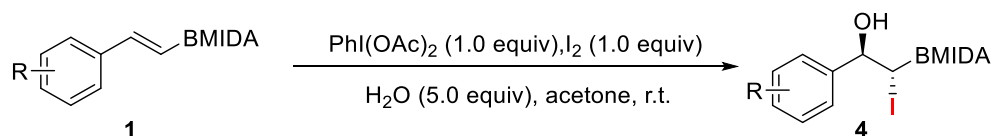

To a solution of alkenyl *N*-methyliminodiacetic (MIDA) boronate (0.3 mmol, 1.0 equiv) in acetone (2.5 mL) was added  $\text{PhI}(\text{OAc})_2$  (0.3 mmol, 1.0 equiv),  $\text{I}_2$  (0.3 mmol, 1.0 equiv) and  $\text{H}_2\text{O}$  (1.5 mmol, 5.0 equiv). The reaction was stirred at room temperature under air until the alkenyl boronate was consumed as monitored by TLC analysis. The reaction mixture was diluted with saturated  $\text{NaHSO}_3$  solution and extracted with  $\text{EtOAc}$  for three times. The combined organic phase was dried over anhydrous  $\text{Na}_2\text{SO}_4$  and concentrated under reduced pressure. The resulting crude product was purified by flash chromatography on silica gel with a mixture of petroleum ether and acetone as eluent.

## 5. Synthesis of $\alpha$ -boryl iodoether and iodoester

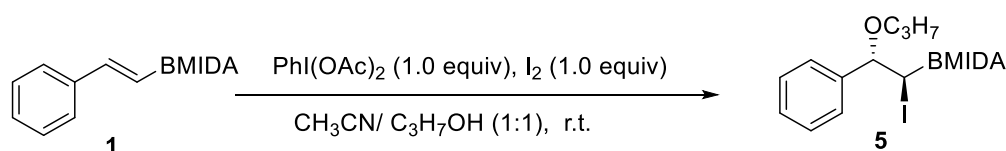

To a solution of alkenyl *N*-methyliminodiacetic (MIDA) boronate (0.2 mmol, 1.0 equiv) in  $\text{CH}_3\text{CN}/\text{C}_3\text{H}_7\text{OH}$  (2.0 mL) was added  $\text{PhI}(\text{OAc})_2$  (0.2 mmol, 1.0 equiv),  $\text{I}_2$  (0.2 mmol, 1.0 equiv). The reaction was stirred at room temperature under air until the alkenyl boronate was consumed as monitored by TLC analysis. The reaction mixture was diluted with saturated  $\text{NaHSO}_3$  solution and extracted with  $\text{EtOAc}$  for three times. The combined organic phase was dried over anhydrous  $\text{Na}_2\text{SO}_4$  and concentrated under reduced pressure. The resulting crude product was purified by flash chromatography on silica gel with a mixture of petroleum ether and acetone as eluent.

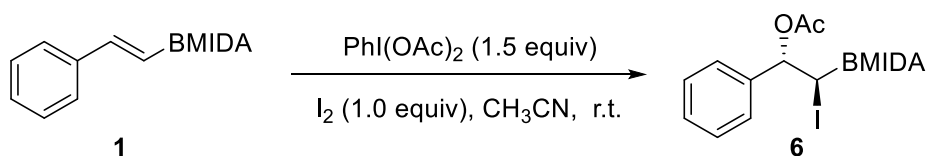

To a solution of alkenyl *N*-methyliminodiacetic (MIDA) boronate (0.2 mmol, 1.0 equiv) in anhydrous  $\text{CH}_3\text{CN}$  (2.0 mL) was added  $\text{PhI}(\text{OAc})_2$  (0.3 mmol, 1.5 equiv),  $\text{I}_2$  (0.2 mmol, 1.0 equiv). The reaction was stirred at room temperature under air until the alkenyl boronate was consumed as monitored by TLC analysis. The reaction mixture was diluted with saturated  $\text{NaHSO}_3$  solution and extracted with  $\text{EtOAc}$  for three times. The combined organic phase was dried over anhydrous  $\text{Na}_2\text{SO}_4$  and concentrated under

reduced pressure. The resulting crude product was purified by flash chromatography on silica gel with a mixture of petroleum ether and acetone as eluent.

## 6. Exploring the tolerance of the (Z)-alkenyl MIDA boronate

### (a) Synthesis of compound **2ba**

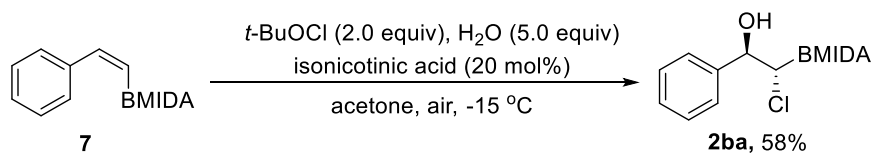

To a solution of substrate **7** (0.3 mmol, 1.0 equiv) and isonicotinic acid (0.2 equiv) in acetone (2.5 mL) at  $-15\text{ }^\circ\text{C}$  was added  $t\text{-BuOCl}$  (0.6 mmol, 2.0 equiv) and  $\text{H}_2\text{O}$  (1.5 mmol, 5.0 equiv). The reaction was stirred at  $-15\text{ }^\circ\text{C}$  under air for 5 h and then 1 M HCl (5.0 mL) was added. The reaction mixture was extracted with EtOAc/acetone (10:1) for three times. The combined organic phase was dried over anhydrous  $\text{Na}_2\text{SO}_4$  and concentrated under reduced pressure. The resulting crude product was purified by flash chromatography on silica gel with a mixture of petroleum ether and acetone as eluent.

### (b) Synthesis of compound **3aa**

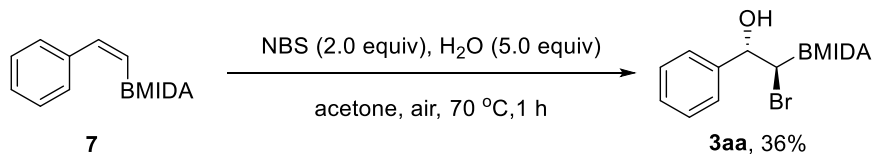

To a solution of substrate **7** (0.3 mmol, 1.0 equiv) in acetone (2.5 mL) was added NBS (0.6 mmol, 2.0 equiv) and  $\text{H}_2\text{O}$  (1.5 mmol, 5.0 equiv). The reaction was stirred at  $70\text{ }^\circ\text{C}$  under air for 1 h and then concentrated under reduced pressure. The resulting crude product was purified by flash chromatography on silica gel with a mixture of petroleum ether and acetone as eluent.

### (c) Synthesis of compound **4aa**

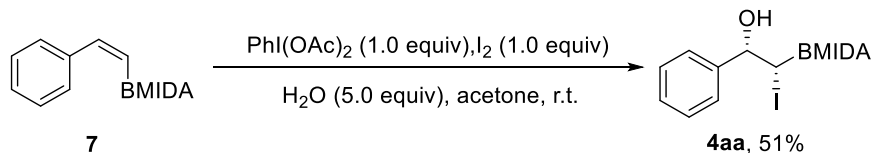

To a solution of substrate **7** (0.3 mmol, 1.0 equiv) in acetone (2.5 mL) was added  $\text{PhI}(\text{OAc})_2$  (0.3 mmol, 1.0 equiv),  $\text{I}_2$  (0.3 mmol, 1.0 equiv) and  $\text{H}_2\text{O}$  (1.5 mmol, 5.0

equiv). The reaction was stirred at room temperature under air until the alkenyl boronate was consumed as monitored by TLC analysis. The reaction mixture was concentrated under reduced pressure and recrystallized from EtOAc.

## 7. Derivatization of the products

### (a) Synthesis of compound **8**

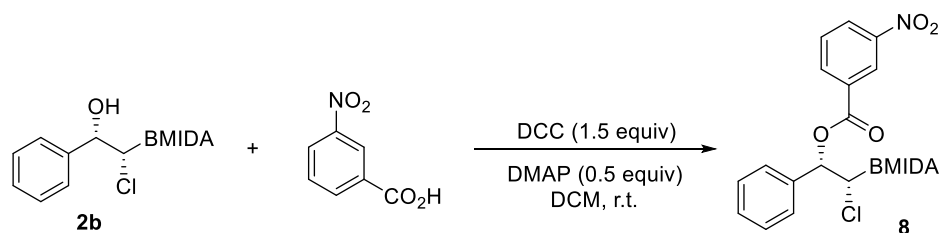

To a solution of **2b** (0.3 mmol, 1.0 equiv) in DCM (3.0 mL) was added DCC (0.45 mmol, 1.5 equiv), DMAP (0.15 mmol, 0.5 equiv). The reaction was stirred at room temperature overnight until the starting material was consumed as monitored by TLC analysis. The reaction mixture was diluted with 1M HCl solution and extracted with EtOAc for three times. The combined organic phase was dried over anhydrous Na<sub>2</sub>SO<sub>4</sub> and concentrated under reduced pressure. The resulting crude product was purified by flash chromatography on silica gel with a mixture of petroleum ether and acetone as eluent.

### (b) Synthesis of compound **9**

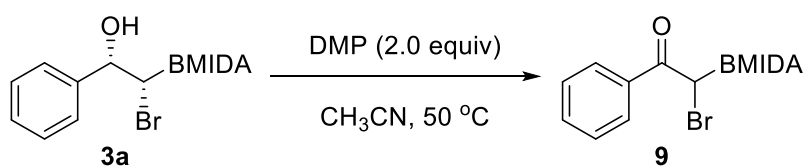

To a solution of **3a** (0.2 mmol, 1.0 equiv) in CH<sub>3</sub>CN (2.0 mL) was added DMP (0.4 mmol, 2.0 equiv). The reaction was stirred at 50 °C until the starting material was consumed as monitored by TLC analysis. The reaction mixture was then concentrated under reduced pressure. The resulting crude product was purified by flash chromatography on silica gel with a mixture of petroleum ether and acetone as eluent.

## 8. Characterization of the products

### 2-(1-chloro-2-(4-fluoro-3-methylphenyl)-2-hydroxyethyl)-6-methyl-1,3,6,2-dioxazaborocane-4,8-dione (2a)

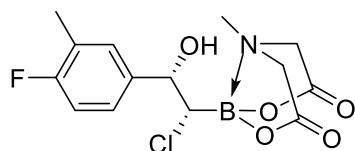

The compound **2a** was obtained in 78% yield as a white solid after column chromatography (eluent = Petroleum ether/ acetone 3:1 v/v).  $R_F = 0.45$  (PE:acetone = 1:1).  $^1\text{H}$  NMR (400 MHz,  $\text{DMSO-}d_6$ )  $\delta$  7.27 (d,  $J = 6.8$  Hz, 1H), 7.25 – 7.21 (m, 1H), 7.05 (t,  $J = 9.1$  Hz, 1H), 5.42 (d,  $J = 5.4$  Hz, 1H), 5.01 (s, 1H), 4.41 (d,  $J = 17.4$  Hz, 1H), 4.20 (d,  $J = 16.8$  Hz, 1H), 4.06 (d,  $J = 17.3$  Hz, 1H), 3.98 (d,  $J = 16.8$  Hz, 1H), 3.75 (d,  $J = 2.6$  Hz, 1H), 3.06 (s, 3H), 2.23 (d,  $J = 1.9$  Hz, 3H);  $^{19}\text{F}$  NMR (376 MHz,  $\text{DMSO-}d_6$ )  $\delta$  -121.16;  $^{13}\text{C}$  NMR (101 MHz,  $\text{DMSO-}d_6$ )  $\delta$  169.1, 168.5, 159.6 (d,  $J = 240.5$  Hz), 140.1 (d,  $J = 3.3$  Hz), 129.3 (d,  $J = 4.9$  Hz), 125.4 (d,  $J = 8.0$  Hz), 122.9 (d,  $J = 17.3$  Hz), 113.8 (d,  $J = 21.9$  Hz), 71.5, 62.6, 62.3, 46.2, 14.4 (d,  $J = 3.1$  Hz). **ESI-MS**: calcd for  $\text{C}_{14}\text{H}_{16}\text{BFCINO}_5\text{Na}$   $[\text{M} + \text{Na}]^+$ : 366.0689, found: 366.0696.

### 2-(1-chloro-2-hydroxy-2-phenylethyl)-6-methyl-1,3,6,2-dioxazaborocane-4,8-dione (2b, major)

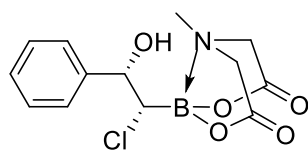

The compound **2b** was obtained in 85% yield as a white solid after column chromatography (eluent = Petroleum ether/ acetone 3:1 v/v).  $R_F = 0.4$  (PE:acetone = 1:1).  $^1\text{H}$  NMR (400 MHz,  $\text{DMSO-}d_6$ )  $\delta$  7.39 (d,  $J = 7.0$  Hz, 2H), 7.31 (t,  $J = 7.6$  Hz, 2H), 7.21 (t,  $J = 7.2$  Hz, 1H), 5.35 (s, 1H), 5.05 (d,  $J = 3.7$  Hz, 1H), 4.40 (d,  $J = 17.4$  Hz, 1H), 4.20 (d,  $J = 16.8$  Hz, 1H), 4.05 (d,  $J = 17.4$  Hz, 1H), 3.98 (d,  $J = 16.8$  Hz, 1H), 3.77 (d,  $J = 2.5$  Hz, 1H), 3.07 (s, 3H);  $^{13}\text{C}$  NMR (101 MHz,  $\text{DMSO-}d_6$ )  $\delta$  168.9, 168.3, 144.2, 127.4, 126.5, 126.2, 71.9, 62.6, 62.3, 46.1. **ESI-MS**: calcd for  $\text{C}_{13}\text{H}_{15}\text{BCINO}_5\text{Na}$   $[\text{M} + \text{Na}]^+$ : 334.0626, found: 334.0630.

**2-(1-chloro-2-hydroxy-2-phenylethyl)-6-methyl-1,3,6,2-dioxazaborocane-4,8-dione (2ba, minor)**

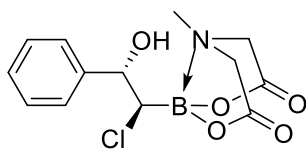

The diastereomer of compound **2b** was obtained in 6% yield as a white solid after column chromatography (eluent = Petroleum ether/ acetone 3:1 v/v).  $R_F$  = 0.32 (PE:acetone = 1:1).  $^1\text{H}$  NMR (400 MHz, DMSO- $d_6$ )  $\delta$  7.37 (d,  $J$  = 6.9 Hz, 2H), 7.31 (t,  $J$  = 7.4 Hz, 2H), 7.24 (t,  $J$  = 7.0 Hz, 1H), 5.84 (d,  $J$  = 3.6 Hz, 1H), 4.66 (dd,  $J$  = 7.9, 3.6 Hz, 1H), 4.35 (d,  $J$  = 17.2 Hz, 1H), 4.21 (d,  $J$  = 16.7 Hz, 1H), 4.01 (d,  $J$  = 17.0 Hz, 2H), 3.76 (d,  $J$  = 7.8 Hz, 1H), 3.12 (s, 3H);  $^{13}\text{C}$  NMR (101 MHz, DMSO- $d_6$ )  $\delta$  168.8, 168.7, 143.5, 127.5, 127.4, 127.2, 74.6, 63.3, 62.5, 46.3. **ESI-MS**: calcd for  $\text{C}_{13}\text{H}_{15}\text{BClINO}_5 \text{Na}$  [ $\text{M} + \text{Na}$ ] $^+$ : 334.0626, found: 334.0621.

**2-(2-(4-(tert-butyl)phenyl)-1-chloro-2-hydroxyethyl)-6-methyl-1,3,6,2-dioxazaborocane-4,8-dione (2c)**

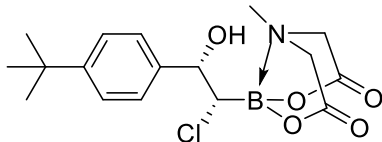

The compound **2c** was obtained in 66% yield as a white solid after column chromatography (eluent = Petroleum ether/ acetone 3:1 v/v).  $R_F$  = 0.63 (PE:acetone = 1:1).  $^1\text{H}$  NMR (400 MHz, DMSO- $d_6$ )  $\delta$  7.35 – 7.29 (m, 4H), 5.30 (d,  $J$  = 5.2 Hz, 1H), 5.02 (dd,  $J$  = 5.3, 2.1 Hz, 1H), 4.41 (d,  $J$  = 17.4 Hz, 1H), 4.19 (d,  $J$  = 16.8 Hz, 1H), 4.05 (d,  $J$  = 17.4 Hz, 1H), 3.98 (d,  $J$  = 16.8 Hz, 1H), 3.73 (d,  $J$  = 2.1 Hz, 1H), 3.06 (s, 3H), 1.28 (s, 9H);  $^{13}\text{C}$  NMR (101 MHz, DMSO- $d_6$ )  $\delta$  169.1, 168.5, 148.8, 141.3, 125.9, 124.2, 71.8, 62.6, 62.3, 46.2, 34.1, 31.2. **ESI-MS**: calcd for  $\text{C}_{17}\text{H}_{23}\text{BClINO}_5\text{Na}$  [ $\text{M} + \text{Na}$ ] $^+$ : 390.1253, found: 390.1253.

**2-(1-chloro-2-hydroxy-2-(p-tolyl)ethyl)-6-methyl-1,3,6,2-dioxazaborocane-4,8-dione (2d)**

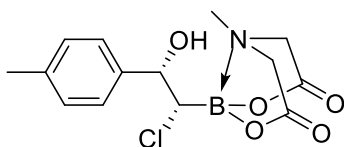

The compound **2d** was obtained in 70% yield as a white solid after column chromatography (eluent = Petroleum ether/ acetone 3:1 v/v).  $R_F$  = 0.43 (PE:acetone = 1:1).



$^1\text{H}$  NMR (400 MHz,  $\text{DMSO-}d_6$ )  $\delta$  7.26 (d,  $J = 7.6$  Hz, 2H), 7.11 (d,  $J = 7.7$  Hz, 2H), 5.28 (s, 1H), 5.01 (s, 1H), 4.40 (d,  $J = 17.4$  Hz, 1H), 4.19 (d,  $J = 16.8$  Hz, 1H), 4.05 (d,  $J = 17.5$  Hz, 1H), 3.98 (d,  $J = 16.8$  Hz, 1H), 3.74 (s, 1H), 3.07 (s, 3H), 2.28 (s, 3H);  $^{13}\text{C}$  NMR (101 MHz,  $\text{DMSO-}d_6$ )  $\delta$  168.9, 168.4, 141.2, 135.4, 128.0, 126.1, 71.8, 62.6, 62.3, 46.1, 20.7. **ESI-MS:** calcd for  $\text{C}_{14}\text{H}_{17}\text{BClNO}_5\text{Na}$   $[\text{M} + \text{Na}]^+$ : 348.0783, found: 348.0785.

**2-(2-([1,1'-biphenyl]-4-yl)-1-chloro-2-hydroxyethyl)-6-methyl-1,3,6,2-dioxazaborocane-4,8-dione (2e)**

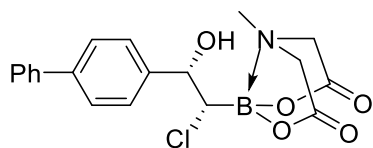

The compound **2e** was obtained in 64% yield as a white solid after recrystallization from EtOAc.  $R_F = 0.42$  (PE:acetone = 1:1).  $^1\text{H}$  NMR (400 MHz,  $\text{DMSO-}d_6$ )  $\delta$  7.68 – 7.61 (m, 4H), 7.50 – 7.44 (m, 4H), 7.35 (t,  $J = 7.4$  Hz, 1H), 5.45 (d,  $J = 5.5$  Hz, 1H), 5.11 (d,  $J = 5.1$  Hz, 1H), 4.43 (d,  $J = 17.3$  Hz, 1H), 4.22 (d,  $J = 16.7$  Hz, 1H), 4.07 (d,  $J = 17.3$  Hz, 1H), 4.00 (d,  $J = 16.8$  Hz, 1H), 3.84 (s, 1H), 3.09 (s, 3H);  $^{13}\text{C}$  NMR (101 MHz,  $\text{DMSO-}d_6$ )  $\delta$  169.6, 168.9, 144.0, 140.6, 138.9, 129.4, 127.7, 127.3, 127.0, 126.3, 72.3, 63.1, 62.8, 46.7. **ESI-MS:** calcd for  $\text{C}_{19}\text{H}_{19}\text{BClNO}_5\text{Na}$   $[\text{M} + \text{Na}]^+$ : 410.0941, found: 410.0945.

**2-(1-chloro-2-hydroxy-2-(4-methoxyphenyl)ethyl)-6-methyl-1,3,6,2-dioxazaborocane-4,8-dione (2f)**

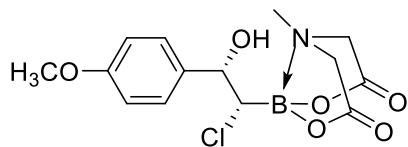

The compound **2f** was obtained in 45% yield as a white solid after column chromatography (eluent = Petroleum ether/ acetone 3:1 v/v).  $R_F = 0.33$  (PE:acetone = 1:1).  $^1\text{H}$  NMR (400 MHz,  $\text{DMSO-}d_6$ )  $\delta$  7.29 (d,  $J = 8.5$  Hz, 2H), 6.86 (d,  $J = 8.7$  Hz, 2H), 5.26 (d,  $J = 5.4$  Hz, 1H), 5.00 (dd,  $J = 5.4, 2.5$  Hz, 1H), 4.39 (d,  $J = 17.4$  Hz, 1H), 4.19 (d,  $J = 16.8$  Hz, 1H), 4.04 (d,  $J = 17.3$  Hz, 1H), 3.98 (d,  $J = 16.8$  Hz, 1H), 3.73 (s, 3H), 3.71 (d,  $J = 2.6$  Hz, 1H), 3.06 (s, 3H);  $^{13}\text{C}$  NMR (101 MHz,  $\text{DMSO-}$

$d_6$ )  $\delta$  169.1, 168.5, 158.0, 136.2, 127.3, 112.9, 71.7, 62.6, 62.3, 54.9, 46.1. **ESI-MS:** calcd for  $C_{14}H_{17}BClNO_6Na$   $[M + Na]^+$ : 364.0732, found: 364.0722.

**2-(1-chloro-2-(4-chlorophenyl)-2-hydroxyethyl)-6-methyl-1,3,6,2-dioxazaborocane-4,8-dione (2g)**

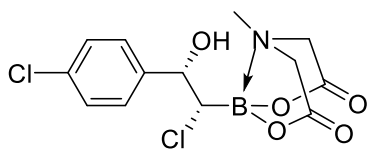

The compound **2g** was obtained in 68% yield as a white solid after recrystallization from EtOAc.  $R_F$  = 0.39 (PE:acetone = 1:1).  $^1H$  NMR (400 MHz, DMSO- $d_6$ )  $\delta$  7.41 (d,  $J$  = 8.6 Hz, 2H), 7.36 (d,  $J$  = 8.6 Hz, 2H), 5.48 (d,  $J$  = 5.5 Hz, 1H), 5.04 (dd,  $J$  = 5.7, 2.5 Hz, 1H), 4.40 (d,  $J$  = 17.4 Hz, 1H), 4.20 (d,  $J$  = 16.9 Hz, 1H), 4.05 (d,  $J$  = 17.4 Hz, 1H), 3.98 (d,  $J$  = 16.9 Hz, 1H), 3.78 (d,  $J$  = 2.6 Hz, 1H), 3.06 (s, 3H);  $^{13}C$  NMR (101 MHz, DMSO- $d_6$ )  $\delta$  168.8, 168.3, 143.2, 131.0, 128.1, 127.4, 71.5, 62.6, 62.3, 46.1. **ESI-MS:** calcd for  $C_{13}H_{14}BCl_2NO_5Na$   $[M + Na]^+$ : 368.0237, found: 368.0240.

**2-(2-(4-bromophenyl)-1-chloro-2-hydroxyethyl)-6-methyl-1,3,6,2-dioxazaborocane-4,8-dione (2h)**

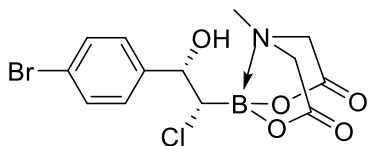

The compound **2h** was obtained in 63% yield as a white solid after recrystallization from EtOAc.  $R_F$  = 0.42 (PE:acetone = 1:1).  $^1H$  NMR (400 MHz, DMSO- $d_6$ )  $\delta$  7.50 (d,  $J$  = 8.0 Hz, 2H), 7.35 (d,  $J$  = 8.1 Hz, 2H), 5.52 (s, 1H), 5.03 (s, 1H), 4.41 (d,  $J$  = 17.3 Hz, 1H), 4.20 (d,  $J$  = 16.8 Hz, 1H), 4.06 (d,  $J$  = 17.4 Hz, 1H), 3.98 (d,  $J$  = 16.8 Hz, 1H), 3.79 (s, 1H), 3.06 (s, 3H);  $^{13}C$  NMR (101 MHz, DMSO- $d_6$ )  $\delta$  169.0, 168.5, 143.7, 130.4, 128.5, 119.6, 71.5, 62.6, 62.3, 46.2. **ESI-MS:** calcd for  $C_{13}H_{14}BClBrNO_5Na$   $[M + Na]^+$ : 411.9732, found: 411.9732.

**methyl 4-(2-chloro-1-hydroxy-2-(6-methyl-4,8-dioxo-1,3,6,2-dioxazaborocan-2-yl)ethyl) benzoate (2i)**

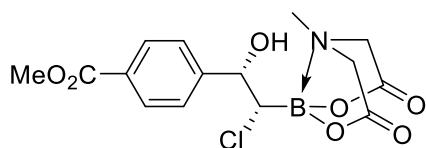

The compound **2i** was obtained in 51% yield as a white solid after recrystallization from EtOAc.  $R_F$  = 0.28 (PE:acetone = 1:1).  $^1\text{H}$  NMR (400 MHz, DMSO- $d_6$ )  $\delta$  7.92 (d,  $J$  = 7.9 Hz, 2H), 7.55 (d,  $J$  = 8.0 Hz, 2H), 5.61 (s, 1H), 5.12 (s, 1H), 4.42 (d,  $J$  = 17.3 Hz, 1H), 4.21 (d,  $J$  = 16.8 Hz, 1H), 4.07 (d,  $J$  = 17.4 Hz, 1H), 3.98 (d,  $J$  = 16.8 Hz, 1H), 3.85 (s, 4H), 3.06 (s, 3H);  $^{13}\text{C}$  NMR (101 MHz, DMSO- $d_6$ )  $\delta$  168.9, 168.5, 166.2, 149.9, 128.5, 127.9, 126.6, 71.9, 62.6, 62.3, 52.0, 46.2. **ESI-MS**: calcd for  $\text{C}_{15}\text{H}_{17}\text{BClINO}_7\text{Na}$   $[\text{M} + \text{Na}]^+$ : 392.0682, found: 392.0681.

**2-(1-chloro-2-hydroxy-2-(o-tolyl)ethyl)-6-methyl-1,3,6,2-dioxazaborocane-4,8-dione (2j)**

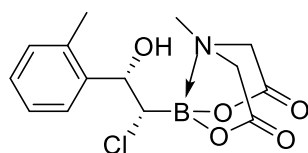

The compound **2j** was obtained in 74% yield as a white solid after column chromatography (eluent = Petroleum ether/ acetone 3:1 v/v).  $R_F$  = 0.42 (PE:acetone = 1:1).  $^1\text{H}$  NMR (400 MHz, DMSO- $d_6$ )  $\delta$  7.51 (d,  $J$  = 7.4 Hz, 1H), 7.18 – 7.09 (m, 3H), 5.28 (d,  $J$  = 5.0 Hz, 1H), 5.22 (dd,  $J$  = 5.1, 2.5 Hz, 1H), 4.41 (d,  $J$  = 17.3 Hz, 1H), 4.20 (d,  $J$  = 16.8 Hz, 1H), 4.05 (d,  $J$  = 17.3 Hz, 1H), 3.99 (d,  $J$  = 16.8 Hz, 1H), 3.58 (s, 1H), 3.07 (s, 3H), 2.26 (s, 3H);  $^{13}\text{C}$  NMR (101 MHz, DMSO- $d_6$ )  $\delta$  168.9, 168.5, 141.9, 133.2, 129.7, 127.6, 126.5, 124.9, 68.1, 62.6, 62.3, 46.1, 18.7. **ESI-MS**: calcd for  $\text{C}_{14}\text{H}_{17}\text{BClINO}_5\text{Na}$   $[\text{M} + \text{Na}]^+$ : 348.0783, found: 348.0766.

**2-(1-chloro-2-(2-chlorophenyl)-2-hydroxyethyl)-6-methyl-1,3,6,2-dioxazaborocane-4,8-dione (2k)**

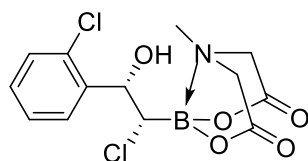

The compound **2k** was obtained in 58% yield as a white solid after column chromatography (eluent = Petroleum ether/ acetone 3:1 v/v).  $R_F$  = 0.42 (PE:acetone = 1:1).  $^1\text{H}$  NMR (400 MHz, Acetonitrile- $d_3$ )  $\delta$  7.64 (dd,  $J$  = 7.7, 1.7 Hz, 1H), 7.39 – 7.33 (m, 2H), 7.28 (td,  $J$  = 7.6, 1.8 Hz, 1H), 5.54 (dd,  $J$  = 5.4, 2.2 Hz, 1H), 4.07 (d,  $J$  = 17.3 Hz, 1H),

4.04 (d,  $J = 16.7$  Hz, 1H), 3.96 (d,  $J = 16.8$  Hz, 1H), 3.93 (d,  $J = 17.3$  Hz, 1H), 3.89 (d,  $J = 2.2$  Hz, 1H), 3.58 (d,  $J = 5.3$  Hz, 1H), 3.08 (s, 3H);  $^{13}\text{C}$  NMR (101 MHz, Acetonitrile- $d_3$ )  $\delta$  169.0, 168.5, 141.0, 131.6, 130.4, 129.9, 129.7, 127.3, 70.6, 63.8, 63.4, 46.9. **ESI-MS**: calcd for  $\text{C}_{13}\text{H}_{14}\text{BCl}_2\text{NO}_5\text{Na}$   $[\text{M} + \text{Na}]^+$ : 368.0237, found: 368.0241.

**2-(2-(3-bromophenyl)-1-chloro-2-hydroxyethyl)-6-methyl-1,3,6,2-dioxazaborocane-4,8-dione (2l)**

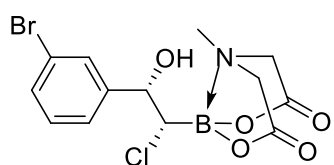

The compound **2l** was obtained in 70% yield as a white solid after column chromatography (eluent = Petroleum ether/ acetone 3:1 v/v).  $R_F = 0.41$  (PE:acetone = 1:1).  $^1\text{H}$  NMR (400 MHz, DMSO- $d_6$ )  $\delta$  7.59 (s, 1H), 7.41 (d,  $J = 8.0$  Hz, 2H), 7.28 (t,  $J = 7.9$  Hz, 1H), 5.53 (s, 1H), 5.05 (s, 1H), 4.40 (d,  $J = 17.4$  Hz, 1H), 4.21 (d,  $J = 16.7$  Hz, 1H), 4.06 (d,  $J = 17.3$  Hz, 1H), 3.98 (d,  $J = 16.8$  Hz, 1H), 3.82 (s, 1H), 3.06 (s, 3H);  $^{13}\text{C}$  NMR (101 MHz, DMSO- $d_6$ )  $\delta$  168.9, 168.4, 147.2, 129.7, 129.3, 129.0, 125.3, 121.0, 71.4, 62.6, 62.3, 46.2. **ESI-MS**: calcd for  $\text{C}_{13}\text{H}_{14}\text{BClBrNO}_5\text{Na}$   $[\text{M} + \text{Na}]^+$ : 411.9732, found: 411.9736.

**2-(1-chloro-2-hydroxy-2-(3-(trifluoromethyl)phenyl)ethyl)-6-methyl-1,3,6,2-dioxazaborocane -4,8-dione (2m, major)**

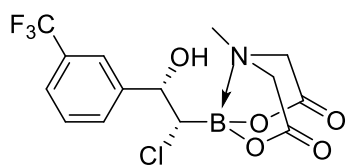

The compound **2m** was obtained in 48% yield as a white solid after column chromatography (eluent = Petroleum ether/ acetone 3:1 v/v).  $R_F = 0.46$  (PE:acetone = 1:1).  $^1\text{H}$  NMR (400 MHz, Acetone- $d_6$ )  $\delta$  7.84 (s, 1H), 7.76 (d,  $J = 7.2$  Hz, 1H), 7.61 – 7.55 (m, 2H), 5.38 (dd,  $J = 5.2, 2.3$  Hz, 1H), 4.42 (d,  $J = 5.1$  Hz, 1H), 4.41 (d,  $J = 16.9$  Hz, 1H), 4.30 (d,  $J = 16.6$  Hz, 1H), 4.17 (d,  $J = 16.6$  Hz, 1H), 4.16 (d,  $J = 17.2$  Hz, 1H), 3.98 (d,  $J = 2.3$  Hz, 1H), 3.35 (s, 3H);  $^{19}\text{F}$  NMR (376 MHz, Acetone- $d_6$ )  $\delta$  -62.88;  $^{13}\text{C}$  NMR (101 MHz, Acetone- $d_6$ )  $\delta$  168.8, 168.2, 146.1, 131.2, 120.3 (q,  $J = 31.6$  Hz), 129.4,

125.6 (q,  $J = 271.8$  Hz), 124.5 (q,  $J = 3.8$  Hz), 124.1 (q,  $J = 4.1$  Hz), 73.5, 64.0, 63.5, 46.9. **ESI-MS**: calcd for  $C_{14}H_{14}BF_3ClNO_5Na$   $[M + Na]^+$ : 402.0500, found: 402.0509.

**2-(1-chloro-2-hydroxy-2-(3-(trifluoromethyl)phenyl)ethyl)-6-methyl-1,3,6,2-dioxazaborocane -4,8-dione (minor)**

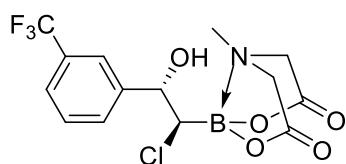

The diastereomer of compound **2m** was obtained in 40% yield as a white solid after column chromatography (eluent = Petroleum ether/ acetone 3:1 v/v).  $R_F = 0.41$

(PE:acetone = 1:1).  $^1H$  NMR (400 MHz, Acetone- $d_6$ )  $\delta$  7.81 (s, 1H), 7.74 (d,  $J = 7.7$  Hz, 1H), 7.60 (d,  $J = 7.8$  Hz, 1H), 7.54 (t,  $J = 7.7$  Hz, 1H), 5.05 (dd,  $J = 7.1, 3.7$  Hz, 1H), 4.94 (d,  $J = 3.7$  Hz, 1H), 4.30 (d,  $J = 17.0$  Hz, 2H), 4.20 (d,  $J = 16.9$  Hz, 1H), 4.09 (d,  $J = 16.9$  Hz, 1H), 3.92 (d,  $J = 7.0$  Hz, 1H), 3.38 (s, 3H);  $^{19}F$  NMR (376 MHz, Acetone- $d_6$ )  $\delta$  -62.88;  $^{13}C$  NMR (101 MHz, Acetone- $d_6$ )  $\delta$  168.7, 168.2, 145.2, 132.6, 130.2 (q,  $J = 31.7$  Hz), 129.2, 125.6 (q,  $J = 271.3$  Hz), 125.2 (q,  $J = 4.0$  Hz), 124.9 (q,  $J = 3.9$  Hz), 75.5, 64.3, 63.7, 46.9. **ESI-MS**: calcd for  $C_{14}H_{14}BF_3ClNO_5Na$   $[M + Na]^+$ : 402.0500, found: 402.0497.

**2-(1-chloro-2-(2,4-dimethylphenyl)-2-hydroxyethyl)-6-methyl-1,3,6,2-dioxazaborocane-4,8-dione (2n)**

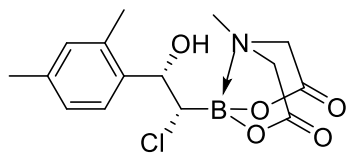

The compound **2n** was obtained in 53% yield as a white solid after column chromatography (eluent = Petroleum ether/ acetone 3:1 v/v).  $R_F = 0.48$  (PE:acetone = 1:1).  $^1H$

NMR (400 MHz, DMSO- $d_6$ )  $\delta$  7.38 (d,  $J = 7.9$  Hz, 1H), 6.96 (d,  $J = 8.2$  Hz, 1H), 6.91 (s, 1H), 5.22 – 5.17 (m, 2H), 4.41 (d,  $J = 17.4$  Hz, 1H), 4.20 (d,  $J = 16.8$  Hz, 1H), 4.04 (d,  $J = 17.4$  Hz, 1H), 3.99 (d,  $J = 16.7$  Hz, 1H), 3.55 (d,  $J = 2.4$  Hz, 1H), 3.06 (s, 3H), 2.24 (s, 3H), 2.22 (s, 3H);  $^{13}C$  NMR (101 MHz, DMSO- $d_6$ )  $\delta$  169.5, 168.9, 139.5, 135.8, 133.4, 130.8, 128.0, 126.0, 68.5, 63.0, 62.8, 46.5, 21.1, 19.1. **ESI-MS**: calcd for  $C_{15}H_{19}BClNO_5Na$   $[M + Na]^+$ : 362.0940, found: 362.0940.

**2-(1-chloro-2-hydroxy-2-(naphthalen-1-yl)ethyl)-6-methyl-1,3,6,2-dioxazaborocane-4,8-dione (2o)**

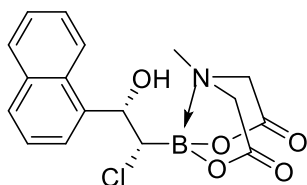

The compound **2o** was obtained in 61% yield as a white solid after recrystallization from EtOAc.  $R_F = 0.39$  (PE:acetone = 1:1).  $^1\text{H}$  NMR (400 MHz, DMSO- $d_6$ )  $\delta$  7.97 – 7.93 (m, 2H), 7.83 (d,  $J = 8.1$  Hz, 1H), 7.74 (d,  $J = 7.1$  Hz, 1H), 7.59 – 7.50 (m, 3H), 5.83 (d,  $J = 2.1$  Hz, 1H), 5.58 (s, 1H), 4.48 (d,  $J = 17.4$  Hz, 1H), 4.23 (d,  $J = 16.8$  Hz, 1H), 4.09 (d,  $J = 17.4$  Hz, 1H), 4.02 (d,  $J = 16.8$  Hz, 1H), 3.80 (d,  $J = 2.2$  Hz, 1H), 3.08 (s, 3H);  $^{13}\text{C}$  NMR (101 MHz, DMSO- $d_6$ )  $\delta$  169.0, 168.3, 138.9, 133.1, 129.3, 128.8, 127.2, 126.1, 125.1, 125.0, 124.9, 122.2, 67.9, 62.7, 62.3, 46.1. **ESI-MS**: calcd for  $\text{C}_{17}\text{H}_{17}\text{BClNO}_5\text{Na}$   $[\text{M} + \text{Na}]^+$ : 384.0784, found: 384.0780.

**2-(1-chloro-2-(9H-fluoren-2-yl)-2-hydroxyethyl)-6-methyl-1,3,6,2-dioxazaborocane-4,8-dione (2p)**

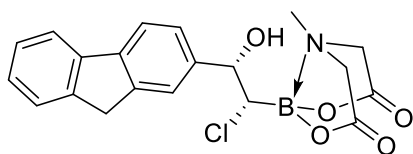

The compound **2p** was obtained in 50% yield as a white solid after recrystallization from EtOAc.  $R_F = 0.42$  (PE:acetone = 1:1).  $^1\text{H}$  NMR (400 MHz, DMSO- $d_6$ )  $\delta$  7.86 (d,  $J = 7.5$  Hz, 1H), 7.83 (d,  $J = 7.8$  Hz, 1H), 7.61 (s, 1H), 7.57 (d,  $J = 7.4$  Hz, 1H), 7.42 (d,  $J = 7.9$  Hz, 1H), 7.37 (t,  $J = 7.4$  Hz, 1H), 7.29 (t,  $J = 7.4$  Hz, 1H), 5.45 (d,  $J = 5.4$  Hz, 1H), 5.14 (dd,  $J = 5.4, 2.4$  Hz, 1H), 4.43 (d,  $J = 17.4$  Hz, 1H), 4.21 (d,  $J = 16.8$  Hz, 1H), 4.07 (d,  $J = 17.4$  Hz, 1H), 4.00 (d,  $J = 16.8$  Hz, 1H), 3.91 (s, 2H), 3.85 (d,  $J = 2.4$  Hz, 1H), 3.09 (s, 3H);  $^{13}\text{C}$  NMR (101 MHz, DMSO- $d_6$ )  $\delta$  169.1, 168.5, 143.3, 143.0, 142.3, 141.1, 139.7, 126.7, 126.4, 125.1, 124.9, 123.0, 119.8, 119.1, 72.2, 62.6, 62.3, 46.2, 36.4. **ESI-MS**: calcd for  $\text{C}_{20}\text{H}_{19}\text{BClNO}_5\text{Na}$   $[\text{M} + \text{Na}]^+$ : 422.0941, found: 422.0946.

**2-(1-chloro-2-hydroxy-2-(thiophen-2-yl)ethyl)-6-methyl-1,3,6,2-dioxazaborocane-4,8-dione (2q)**

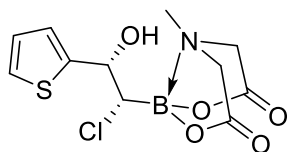

The compound **2q** was obtained in 28% yield as a yellow solid after column chromatography (eluent = Petroleum ether/ acetone 3:1 v/v).  $R_F$  = 0.38 (PE:acetone = 1:1).  $^1\text{H}$  NMR (400 MHz, Acetone- $d_6$ )  $\delta$  7.34 (d,  $J$  = 5.3 Hz, 1H), 7.09 (d,  $J$  = 3.5 Hz, 1H), 6.95 (dd,  $J$  = 5.1, 3.6 Hz, 1H), 5.15 (dd,  $J$  = 7.9, 2.7 Hz, 1H), 5.06 (d,  $J$  = 3.6 Hz, 1H), 4.32 (d,  $J$  = 17.0 Hz, 1H), 4.25 (d,  $J$  = 16.8 Hz, 1H), 4.18 (d,  $J$  = 16.9 Hz, 1H), 4.13 (d,  $J$  = 16.9 Hz, 1H), 3.79 (d,  $J$  = 7.8 Hz, 1H), 3.36 (s, 3H);  $^{13}\text{C}$  NMR (101 MHz, Acetone- $d_6$ )  $\delta$  168.7, 168.4, 147.9, 126.8, 126.3, 125.4, 72.5, 64.5, 63.7, 46.9. **ESI-MS**: calcd for  $\text{C}_{11}\text{H}_{13}\text{BClSNO}_5\text{Na}$   $[\text{M} + \text{Na}]^+$ : 340.0190, found: 340.0195.

**2-(1-bromo-2-hydroxy-2-phenylethyl)-6-methyl-1,3,6,2-dioxazaborocane-4,8-dione (3a)**

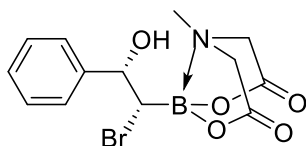

The compound **3a** was obtained in 75% yield as a white solid after column chromatography (eluent = Petroleum ether/ acetone 3:1 v/v).  $R_F$  = 0.40 (PE:acetone = 1:1).  $^1\text{H}$  NMR (400 MHz, DMSO- $d_6$ )  $\delta$  7.38 (d,  $J$  = 7.6 Hz, 2H), 7.30 (t,  $J$  = 7.5 Hz, 2H), 7.21 (t,  $J$  = 7.3 Hz, 1H), 5.40 (d,  $J$  = 5.3 Hz, 1H), 5.00 (d,  $J$  = 5.3 Hz, 1H), 4.42 (d,  $J$  = 17.3 Hz, 1H), 4.21 (d,  $J$  = 16.7 Hz, 1H), 4.07 (d,  $J$  = 17.4 Hz, 1H), 3.98 (d,  $J$  = 16.8 Hz, 1H), 3.80 (s, 1H), 3.09 (s, 3H);  $^{13}\text{C}$  NMR (101 MHz, DMSO- $d_6$ )  $\delta$  169.0, 168.5, 145.0, 127.6, 126.6, 126.1, 71.5, 62.8, 62.6, 46.2. **ESI-MS**: calcd for  $\text{C}_{13}\text{H}_{15}\text{BBrNO}_5\text{Na}$   $[\text{M} + \text{Na}]^+$ : 378.0121, found: 378.0123.

**2-(1-bromo-2-hydroxy-2-(*p*-tolyl)ethyl)-6-methyl-1,3,6,2-dioxazaborocane-4,8-dione(3b)**

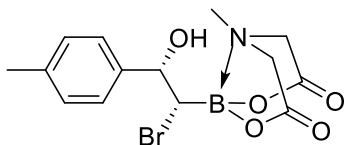

The compound **3b** was obtained in 64% yield as a white solid after column chromatography (eluent = Petroleum ether/ acetone 3:1 v/v).  $R_F$  = 0.44 (PE:acetone = 1:1).  $^1\text{H}$  NMR (500 MHz, DMSO- $d_6$ )  $\delta$  7.26 (d,  $J$  = 7.5 Hz, 2H), 7.11 (d,  $J$  = 7.3 Hz, 2H), 5.33 (s, 1H), 4.97 (s, 1H), 4.42 (d,  $J$  = 17.3 Hz, 1H), 4.21 (d,  $J$  = 16.8 Hz, 1H), 4.07 (d,

$J = 17.4$  Hz, 1H), 3.99 (d,  $J = 16.8$  Hz, 1H), 3.78 (s, 1H), 3.09 (s, 3H), 2.28 (s, 3H);  $^{13}\text{C}$  NMR (126 MHz, DMSO- $d_6$ )  $\delta$  168.9, 168.4, 142.0, 135.4, 128.1, 125.9, 71.3, 62.7, 62.5, 46.2, 20.7.

**2-(1-bromo-2-(4-(tert-butyl)phenyl)-2-hydroxyethyl)-6-methyl-1,3,6,2-dioxazaborocane-4,8-dione (3c)**

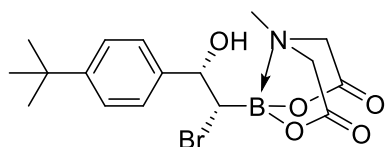

The compound **3c** was obtained in 57% yield as a white solid after column chromatography (eluent = Petroleum ether/ acetone 3:1 v/v).  $R_F = 0.51$  (PE:acetone = 1:1).  $^1\text{H}$  NMR (400 MHz, Acetonitrile- $d_3$ )  $\delta$  7.40 (d,  $J = 8.3$  Hz, 2H), 7.32 (d,  $J = 8.3$  Hz, 2H), 5.12 (dd,  $J = 5.6, 1.9$  Hz, 1H), 4.05 – 3.92 (m, 4H), 3.79 (d,  $J = 2.0$  Hz, 1H), 3.29 (d,  $J = 5.6$  Hz, 1H), 3.10 (s, 3H), 1.31 (s, 9H);  $^{13}\text{C}$  NMR (101 MHz, Acetonitrile- $d_3$ )  $\delta$  168.9, 168.5, 150.8, 142.1, 126.7, 125.6, 73.0, 63.9, 63.7, 46.9, 35.0, 31.6. **ESI-MS**: calcd for  $\text{C}_{17}\text{H}_{23}\text{BBrNO}_5\text{Na}$   $[\text{M} + \text{Na}]^+$ : 434.0748, found: 434.0744

**2-(1-bromo-2-(4-chlorophenyl)-2-hydroxyethyl)-6-methyl-1,3,6,2-dioxazaborocane-4,8-dione (3d)**

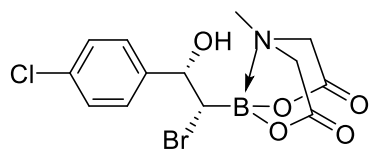

The compound **3d** was obtained in 69% yield as a white solid after column chromatography (eluent = Petroleum ether/ acetone 3:1 v/v).  $R_F = 0.46$  (PE:acetone = 1:1).  $^1\text{H}$  NMR (400 MHz, DMSO- $d_6$ )  $\delta$  7.40 (d,  $J = 8.4$  Hz, 2H), 7.36 (d,  $J = 8.5$  Hz, 2H), 5.53 (s, 1H), 5.00 (s, 1H), 4.42 (d,  $J = 17.4$  Hz, 1H), 4.21 (d,  $J = 16.9$  Hz, 1H), 4.07 (d,  $J = 17.4$  Hz, 1H), 3.98 (d,  $J = 16.9$  Hz, 1H), 3.81 (d,  $J = 2.1$  Hz, 1H), 3.08 (s, 3H);  $^{13}\text{C}$  NMR (101 MHz, DMSO- $d_6$ )  $\delta$  168.9, 168.4, 144.1, 131.0, 127.9, 127.4, 70.9, 62.7, 62.5, 46.2. **ESI-MS**: calcd for  $\text{C}_{13}\text{H}_{14}\text{BClBrNO}_5\text{Na}$   $[\text{M} + \text{Na}]^+$ : 411.9732, found: 411.9729.

**2-(1-bromo-2-(4-bromophenyl)-2-hydroxyethyl)-6-methyl-1,3,6,2-dioxazaborocane-4,8-dione (3e)**



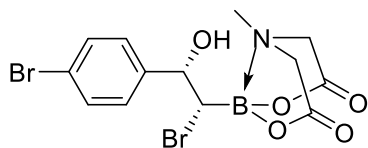

The compound **3e** was obtained in 54% yield as a white solid after column chromatography (eluent = Petroleum ether/ acetone 3:1 v/v).  $R_F$  = 0.46 (PE:acetone = 1:1).  $^1\text{H}$  NMR (400 MHz,  $\text{DMSO-}d_6$ )  $\delta$  7.50 (d,  $J$  = 8.1 Hz, 2H), 7.34 (d,  $J$  = 8.2 Hz, 2H), 5.53 (d,  $J$  = 5.4 Hz, 1H), 4.98 (d,  $J$  = 4.6 Hz, 1H), 4.41 (d,  $J$  = 17.4 Hz, 1H), 4.21 (d,  $J$  = 16.9 Hz, 1H), 4.07 (d,  $J$  = 17.3 Hz, 1H), 3.98 (d,  $J$  = 16.8 Hz, 1H), 3.80 (d,  $J$  = 2.1 Hz, 1H), 3.08 (s, 3H);  $^{13}\text{C}$  NMR (101 MHz,  $\text{DMSO-}d_6$ )  $\delta$  168.9, 168.4, 144.5, 130.3, 128.3, 119.6, 70.9, 62.7, 62.5, 46.2. **ESI-MS**: calcd for  $\text{C}_{13}\text{H}_{14}\text{BBBr}_2\text{NO}_5\text{Na}$   $[\text{M} + \text{Na}]^+$ : 455.9226, found: 455.9226.

**2-(2-([1,1'-biphenyl]-4-yl)-1-bromo-2-hydroxyethyl)-6-methyl-1,3,6,2-dioxazaborocane-4,8-dione (3f)**

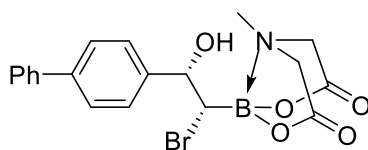

The compound **3f** was obtained in 59% yield as a white solid after recrystallization from EtOAc.  $R_F$  = 0.44 (PE:acetone = 1:1).  $^1\text{H}$  NMR (400 MHz,  $\text{DMSO-}d_6$ )  $\delta$  7.67 (d,  $J$  = 7.7 Hz, 2H), 7.61 (d,  $J$  = 8.0 Hz, 2H), 7.53 – 7.41 (m, 4H), 7.35 (t,  $J$  = 7.4 Hz, 1H), 5.06 (d,  $J$  = 1.9 Hz, 1H), 4.43 (d,  $J$  = 17.4 Hz, 1H), 4.22 (d,  $J$  = 16.9 Hz, 1H), 4.09 (d,  $J$  = 17.4 Hz, 1H), 4.00 (d,  $J$  = 16.8 Hz, 1H), 3.86 (d,  $J$  = 2.0 Hz, 1H), 3.11 (s, 3H);  $^{13}\text{C}$  NMR (101 MHz,  $\text{DMSO-}d_6$ )  $\delta$  168.9, 168.5, 144.4, 140.1, 138.4, 128.9, 127.2, 126.6, 126.6, 125.8, 71.3, 62.7, 62.6, 46.2. **ESI-MS**: calcd for  $\text{C}_{19}\text{H}_{19}\text{BBBrNO}_5\text{Na}$   $[\text{M} + \text{Na}]^+$ : 454.0435, found: 454.0437.

**2-(1-bromo-2-hydroxy-2-(o-tolyl)ethyl)-6-methyl-1,3,6,2-dioxazaborocane-4,8-dione (3g)**

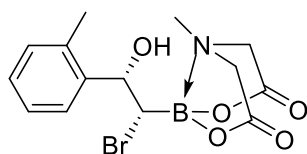

The compound **3g** was obtained in 56% yield as a white solid after column chromatography (eluent = Petroleum ether/ acetone 3:1 v/v).  $R_F$  = 0.45 (PE:acetone = 1:1).  $^1\text{H}$  NMR (400 MHz, Acetonitrile- $d_3$ )  $\delta$  7.53 (dd,  $J$  = 7.3, 1.8 Hz, 1H), 7.24 – 7.13 (m, 3H), 5.31 (dd,  $J$  = 4.9, 2.4 Hz, 1H), 4.05 (d,  $J$  = 17.3 Hz, 1H), 4.02 (s, 2H),

3.92 (d,  $J = 17.3$  Hz, 1H), 3.70 (d,  $J = 2.4$  Hz, 1H), 3.27 (d,  $J = 4.9$  Hz, 1H), 3.10 (s, 3H), 2.32 (s, 3H);  $^{13}\text{C}$  NMR (101 MHz, Acetonitrile- $d_3$ )  $\delta$  168.9, 168.5, 142.6, 134.7, 130.9, 128.1, 127.9, 125.9, 69.7, 63.9, 63.7, 46.9, 19.1. **ESI-MS**: calcd for  $\text{C}_{14}\text{H}_{17}\text{BBrNO}_5\text{Na}$   $[\text{M} + \text{Na}]^+$ : 392.0278, found: 392.0274.

**2-(1-bromo-2-(4-fluoro-3-methylphenyl)-2-hydroxyethyl)-6-methyl-1,3,6,2-dioxazaborocane-4,8-dione (3h)**

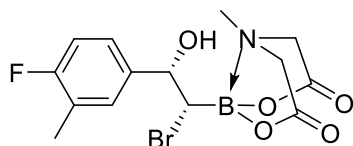

The compound **3h** was obtained in 77% yield as a white solid after column chromatography (eluent = Petroleum ether/ acetone 3:1 v/v).  $R_F = 0.44$  (PE:acetone = 1:1).  $^1\text{H}$  NMR (400 MHz,  $\text{DMSO}-d_6$ )  $\delta$  7.26 (d,  $J = 7.9$  Hz, 1H), 7.24 – 7.19 (m, 1H), 7.05 (t,  $J = 9.1$  Hz, 1H), 5.42 (d,  $J = 5.3$  Hz, 1H), 4.96 (d,  $J = 5.2$  Hz, 1H), 4.41 (d,  $J = 17.4$  Hz, 1H), 4.21 (d,  $J = 16.8$  Hz, 1H), 4.07 (d,  $J = 17.4$  Hz, 1H), 3.98 (d,  $J = 16.8$  Hz, 1H), 3.77 (d,  $J = 2.1$  Hz, 1H), 3.08 (s, 3H), 2.23 (s, 3H);  $^{19}\text{F}$  NMR (376 MHz,  $\text{DMSO}-d_6$ )  $\delta$  -121.22.  $^{13}\text{C}$  NMR (101 MHz,  $\text{DMSO}-d_6$ )  $\delta$  168.9, 168.4, 159.5 (d,  $J = 240.9$  Hz), 140.8 (d,  $J = 3.3$  Hz), 129.1 (d,  $J = 5.0$  Hz), 125.2 (d,  $J = 7.8$  Hz), 122.8 (d,  $J = 17.2$  Hz), 113.8 (d,  $J = 21.9$  Hz), 70.9, 62.7, 62.5, 46.2, 14.4 (d,  $J = 3.4$  Hz). **ESI-MS**: calcd for  $\text{C}_{14}\text{H}_{16}\text{BFBrNO}_5\text{Na}$   $[\text{M} + \text{Na}]^+$ : 410.0184, found: 410.0183.

**2-(1-bromo-2-hydroxy-2-(naphthalen-1-yl)ethyl)-6-methyl-1,3,6,2-dioxazaborocane-4,8-dione (3i)**

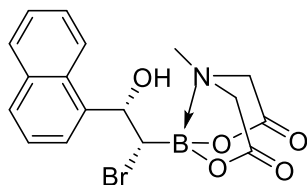

The compound **3i** was obtained in 50% yield as a white solid after recrystallization from EtOAc.  $R_F = 0.44$  (PE:acetone = 1:1).  $^1\text{H}$  NMR (400 MHz,  $\text{DMSO}-d_6$ )  $\delta$  7.95 (t,  $J = 9.5$  Hz, 2H), 7.84 (d,  $J = 8.1$  Hz, 1H), 7.73 (d,  $J = 7.2$  Hz, 1H), 7.61 – 7.48 (m, 3H), 5.74 (s, 1H), 5.62 (s, 1H), 4.49 (d,  $J = 17.4$  Hz, 1H), 4.25 (d,  $J = 16.8$  Hz, 1H), 4.11 (d,  $J = 17.5$  Hz, 1H), 4.03 (d,  $J = 16.8$  Hz, 1H), 3.83 (d,  $J = 2.0$  Hz, 1H), 3.11 (s, 3H);  $^{13}\text{C}$  NMR (101 MHz,  $\text{DMSO}-d_6$ )  $\delta$  169.1, 168.4, 139.6, 133.2, 129.2, 128.9,

127.3, 126.3, 125.3, 125.0, 124.9, 122.1, 67.4, 62.9, 62.6, 46.2. **ESI-MS:** calcd for  $C_{17}H_{17}BBrNO_5Na$   $[M + Na]^+$ : 428.0278, found: 428.0285.

**2-(2-hydroxy-1-iodo-2-phenylethyl)-6-methyl-1,3,6,2-dioxazaborocane-4,8-dione (4a)**

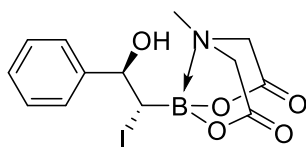

The compound **4a** was obtained in 69% yield as a white solid after column chromatography (eluent = Petroleum ether/ acetone 3:1 v/v).  $R_F$  = 0.37 (PE:acetone = 1:1).  $^1H$  NMR (400 MHz, Acetone- $d_6$ )  $\delta$  7.43 (d,  $J$  = 7.0 Hz, 2H), 7.31 (t,  $J$  = 7.4 Hz, 2H), 7.24 (t,  $J$  = 7.1 Hz, 1H), 4.97 (d,  $J$  = 2.8 Hz, 1H), 4.82 (dd,  $J$  = 9.9, 3.0 Hz, 1H), 4.40 (d,  $J$  = 17.3 Hz, 1H), 4.31 (d,  $J$  = 16.3 Hz, 1H), 4.21 (d,  $J$  = 17.3 Hz, 1H), 4.16 (d,  $J$  = 16.3 Hz, 1H), 3.86 (d,  $J$  = 9.9 Hz, 1H), 3.46 (s, 3H);  $^{13}C$  NMR (101 MHz, Acetone- $d_6$ )  $\delta$  168.6, 168.3, 145.6, 128.6, 128.4, 128.3, 78.0, 65.6, 63.8, 47.2. **ESI-MS:** calcd for  $C_{13}H_{15}BINO_5Na$   $[M + Na]^+$ : 425.9983, found: 425.9988.

**2-(2-(4-(tert-butyl)phenyl)-2-hydroxy-1-iodoethyl)-6-methyl-1,3,6,2-dioxazaborocane-4,8-dione (4b)**

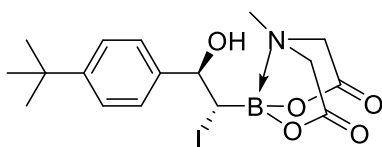

The compound **4b** was obtained in 86% yield as a white solid after column chromatography (eluent = Petroleum ether/ acetone 3:1 v/v).  $R_F$  = 0.57 (PE:acetone = 1:1).  $^1H$  NMR (400 MHz, Acetone- $d_6$ )  $\delta$  7.36 (s, 4H), 4.86 (d,  $J$  = 2.8 Hz, 1H), 4.81 (dd,  $J$  = 10.1, 2.8 Hz, 1H), 4.41 (d,  $J$  = 17.3 Hz, 1H), 4.32 (d,  $J$  = 16.2 Hz, 1H), 4.22 (d,  $J$  = 17.2 Hz, 1H), 4.15 (d,  $J$  = 16.3 Hz, 1H), 3.86 (d,  $J$  = 10.1 Hz, 1H), 3.46 (s, 3H), 1.31 (s, 9H);  $^{13}C$  NMR (101 MHz, Acetone- $d_6$ )  $\delta$  168.7, 168.4, 151.1, 142.7, 128.1, 125.5, 77.9, 65.7, 63.9, 47.2, 35.0, 31.7. **ESI-MS:** calcd for  $C_{17}H_{23}BINO_5Na$   $[M + Na]^+$ : 482.0609, found: 482.0607.

**2-(2-(4-chlorophenyl)-2-hydroxy-1-iodoethyl)-6-methyl-1,3,6,2-dioxazaborocane-4,8-dione (4c)**

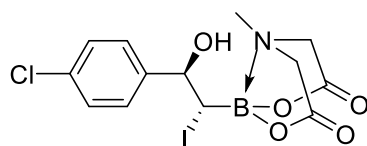

The compound **4c** was obtained in 54% yield as a white solid after column chromatography (eluent = Petroleum ether/ acetone 3:1 v/v).  $R_F = 0.46$  (PE:acetone = 1:1).  $^1\text{H}$  NMR (400 MHz, Acetone- $d_6$ )

$\delta$  7.47 (d,  $J = 8.5$  Hz, 2H), 7.34 (d,  $J = 8.5$  Hz, 2H), 5.08 (d,  $J = 3.0$  Hz, 1H), 4.81 (dd,  $J = 9.3, 3.0$  Hz, 1H), 4.39 (d,  $J = 17.2$  Hz, 1H), 4.29 (d,  $J = 16.5$  Hz, 1H), 4.20 (d,  $J = 17.2$  Hz, 1H), 4.18 (d,  $J = 16.5$  Hz, 1H), 3.85 (d,  $J = 9.4$  Hz, 1H), 3.45 (s, 3H);  $^{13}\text{C}$  NMR (101 MHz, Acetone- $d_6$ )  $\delta$  168.6, 168.3, 144.5, 133.5, 130.1, 128.6, 76.9, 65.5, 63.8, 47.2. **ESI-MS**: calcd for  $\text{C}_{13}\text{H}_{14}\text{BClINO}_5\text{Na}$   $[\text{M} + \text{Na}]^+$ : 459.9593, found: 459.9594.

**2-(2-(3-bromophenyl)-2-hydroxy-1-iodoethyl)-6-methyl-1,3,6,2-dioxazaborocane-4,8-dione (4d)**

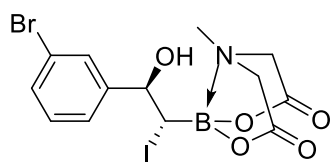

The compound **4d** was obtained in 56% yield as a white solid after column chromatography (eluent = Petroleum ether/ acetone 3:1 v/v).  $R_F = 0.46$  (PE:acetone = 1:1).  $^1\text{H}$

NMR (400 MHz, Acetone- $d_6$ )  $\delta$  7.64 (s, 1H), 7.47 – 7.40 (m, 2H), 7.28 (t,  $J = 7.8$  Hz, 1H), 5.15 (d,  $J = 3.0$  Hz, 1H), 4.80 (dd,  $J = 9.4, 3.1$  Hz, 1H), 4.40 (d,  $J = 17.2$  Hz, 1H), 4.29 (d,  $J = 16.5$  Hz, 1H), 4.21 (d,  $J = 17.3$  Hz, 1H), 4.19 (d,  $J = 16.5$  Hz, 1H), 3.87 (d,  $J = 9.4$  Hz, 1H), 3.45 (s, 3H);  $^{13}\text{C}$  NMR (101 MHz, Acetone- $d_6$ )  $\delta$  168.6, 168.2, 148.2, 131.4, 131.1, 130.5, 127.6, 122.2, 76.9, 65.5, 63.8, 47.2. **ESI-MS**: calcd for  $\text{C}_{13}\text{H}_{14}\text{BBrINO}_5\text{Na}$   $[\text{M} + \text{Na}]^+$ : 503.9088, found: 503.9085.

**2-(2-(4-fluoro-3-methylphenyl)-2-hydroxy-1-iodoethyl)-6-methyl-1,3,6,2-dioxazaborocane-4,8-dione (4e)**

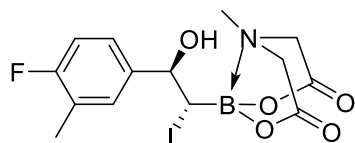

The compound **4e** was obtained in 57% yield as a white solid after column chromatography (eluent = Petroleum ether/ acetone 3:1 v/v).  $R_F = 0.46$

(PE:acetone = 1:1).  $^1\text{H}$  NMR (400 MHz, Acetonitrile- $d_3$ )  $\delta$  7.31 – 7.28 (m, 1H), 7.24 –

7.20 (m, 1H), 7.00 (t,  $J = 9.1$  Hz, 1H), 4.70 (dd,  $J = 9.6, 3.0$  Hz, 1H), 4.11 (d,  $J = 16.6$  Hz, 1H), 4.09 (d,  $J = 17.2$  Hz, 1H), 4.01 (d,  $J = 17.5$  Hz, 1H), 3.92 (d,  $J = 16.6$  Hz, 1H), 3.84 (d,  $J = 3.1$  Hz, 1H), 3.75 (d,  $J = 9.6$  Hz, 1H), 3.18 (s, 3H), 2.27 (s, 3H);  $^{19}\text{F}$  NMR (376 MHz, Acetonitrile- $d_3$ )  $\delta$  -120.75;  $^{13}\text{C}$  NMR (101 MHz, Acetonitrile- $d_3$ )  $\delta$  168.9, 168.6, 161.6 (d,  $J = 242.6$  Hz), 141.0 (d,  $J = 3.5$  Hz), 131.5 (d,  $J = 5.2$  Hz), 127.6 (d,  $J = 8.1$  Hz), 124.9 (d,  $J = 17.4$  Hz), 114.9 (d,  $J = 22.4$  Hz), 76.9, 65.6, 63.8, 47.4, 14.6 (d,  $J = 3.7$  Hz). **ESI-MS:** calcd for  $\text{C}_{14}\text{H}_{16}\text{BFINO}_5\text{Na}$   $[\text{M} + \text{Na}]^+$ : 458.0045, found: 458.0046.

**2-(2-hydroxy-1-iodo-2-(3-(trifluoromethyl)phenyl)ethyl)-6-methyl-1,3,6,2-dioxazaborocane-4,8-dione (4f)**

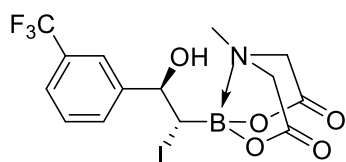

The compound **4f** was obtained in 87% yield as a white solid after column chromatography (eluent = Petroleum ether/ acetone 3:1 v/v).  $R_F = 0.46$  (PE:acetone = 1:1).  $^1\text{H}$  NMR (400 MHz, Acetonitrile- $d_3$ )  $\delta$  7.74 (s, 1H), 7.68 (d,  $J = 7.7$  Hz, 1H), 7.61 (d,  $J = 8.4$  Hz, 1H), 7.53 (t,  $J = 7.7$  Hz, 1H), 4.83 (dd,  $J = 8.9, 3.3$  Hz, 1H), 4.13 – 4.06 (m, 3H), 4.00 (d,  $J = 17.3$  Hz, 1H), 3.94 (d,  $J = 16.8$  Hz, 1H), 3.80 (d,  $J = 8.9$  Hz, 1H), 3.18 (s, 3H);  $^{19}\text{F}$  NMR (376 MHz, Acetonitrile- $d_3$ )  $\delta$  -62.94;  $^{13}\text{C}$  NMR (101 MHz, Acetonitrile- $d_3$ )  $\delta$  168.8, 168.5, 146.3, 132.4, 130.2 (q,  $J = 31.8$  Hz), 129.5, 125.5 (q,  $J = 271.4$  Hz), 125.4 (q,  $J = 3.8$  Hz), 125.1 (q,  $J = 3.9$  Hz), 76.3, 65.4, 63.8, 47.4. **ESI-MS:** calcd for  $\text{C}_{14}\text{H}_{14}\text{BF}_3\text{INO}_5\text{Na}$   $[\text{M} + \text{Na}]^+$ : 493.9857, found: 493.9852.

**2-(2-hydroxy-1-iodo-2-(naphthalen-1-yl)ethyl)-6-methyl-1,3,6,2-dioxazaborocane-4,8-dione (4g)**

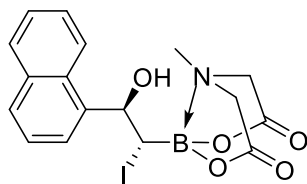

The compound **4g** was obtained in 66% yield as a white solid after column chromatography (eluent = Petroleum ether/ acetone 3:1 v/v).  $R_F = 0.43$  (PE:acetone = 1:1).  $^1\text{H}$  NMR (400 MHz, DMSO- $d_6$ )  $\delta$  8.25 (d,  $J = 8.5$  Hz, 1H), 7.93 (dd,  $J = 8.1, 1.5$  Hz, 1H), 7.85 (d,  $J = 8.1$  Hz, 1H), 7.66 (dd,  $J = 7.3, 1.2$  Hz, 1H), 7.59 – 7.49

(m, 3H), 6.17 (d,  $J = 3.7$  Hz, 1H), 5.46 (dd,  $J = 10.7, 3.4$  Hz, 1H), 4.54 (d,  $J = 17.6$  Hz, 1H), 4.21 – 4.07 (m, 4H), 3.31 (s, 3H);  $^{13}\text{C}$  NMR (101 MHz, DMSO- $d_6$ )  $\delta$  168.6, 168.5, 140.5, 133.3, 130.9, 128.5, 127.8, 125.7, 125.3, 125.2, 124.9, 123.7, 72.7, 64.5, 62.7, 46.8. **ESI-MS**: calcd for  $\text{C}_{17}\text{H}_{17}\text{BINO}_5\text{Na}$   $[\text{M} + \text{Na}]^+$ : 476.0140, found: 476.0134.

**2-(2-hydroxy-1-iodo-4-phenylbutyl)-6-methyl-1,3,6,2-dioxazaborocane-4,8-dione (4h)**

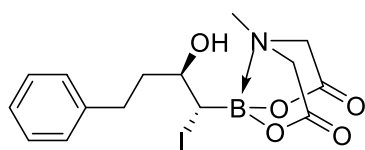

The compound **4h** was obtained in 64% yield as a white solid after column chromatography (eluent = Petroleum ether/ acetone 3:1 v/v).  $R_F = 0.30$  (PE:acetone = 1:1).  $^1\text{H}$

NMR (400 MHz, Acetone- $d_6$ )  $\delta$  7.27 – 7.22 (m, 4H), 7.17 – 7.13 (m, 1H), 4.30 – 4.24 (m, 2H), 4.19 – 4.11 (m, 2H), 4.04 (d,  $J = 5.2$  Hz, 1H), 3.79 (d,  $J = 4.6$  Hz, 1H), 3.42 – 3.39 (m, 1H), 3.29 (s, 3H), 2.94 – 2.86 (m, 1H), 2.74 – 2.65 (m, 1H), 2.14 – 2.05 (m, 1H), 1.90 – 1.80 (m, 1H);  $^{13}\text{C}$  NMR (101 MHz, Acetone- $d_6$ )  $\delta$  168.3, 168.1, 143.5, 129.3, 129.1, 126.5, 72.1, 64.6, 63.8, 46.5, 39.9, 32.6. **ESI-MS**: calcd for  $\text{C}_{15}\text{H}_{19}\text{BINO}_5\text{Na}$   $[\text{M} + \text{Na}]^+$ : 454.0296, found: 454.0300.

**2-(1-iodo-2-phenyl-2-propoxyethyl)-6-methyl-1,3,6,2-dioxazaborocane-4,8-dione (5)**

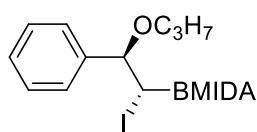

The compound **5** was obtained in 74% yield as a white solid after column chromatography (eluent = Petroleum ether/ acetone 3:1 v/v).  $R_F = 0.61$  (PE:acetone = 1:1).  $^1\text{H}$  NMR (400 MHz, Acetone-

$d_6$ )  $\delta$  7.43 (d,  $J = 7.1$  Hz, 2H), 7.35 (t,  $J = 7.2$  Hz, 2H), 7.29 (t,  $J = 7.1$  Hz, 1H), 4.47 – 4.40 (m, 2H), 4.26 (d,  $J = 16.7$  Hz, 1H), 4.23 (d,  $J = 17.3$  Hz, 1H), 4.15 (d,  $J = 16.7$  Hz, 1H), 3.84 (d,  $J = 9.7$  Hz, 1H), 3.46 (s, 3H), 3.26 (dt,  $J = 9.3, 6.5$  Hz, 1H), 3.04 (dt,  $J = 9.3, 7.5$  Hz, 1H), 1.46 (h,  $J = 7.3$  Hz, 2H), 0.75 (t,  $J = 7.4$  Hz, 3H);  $^{13}\text{C}$  NMR (101 MHz, Acetone- $d_6$ )  $\delta$  168.6, 168.3, 142.5, 129.2, 128.8, 128.7, 85.5, 71.5, 65.9, 64.3, 47.8, 23.5, 10.8. **ESI-MS**: calcd for  $\text{C}_{16}\text{H}_{21}\text{BINO}_5\text{Na}$   $[\text{M} + \text{Na}]^+$ : 468.0453, found: 468.0447.

**2-iodo-2-(6-methyl-4,8-dioxo-1,3,6,2-dioxazaborocan-2-yl)-1-phenylethyl acetate  
(6)**

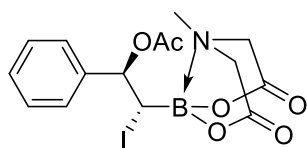

The compound **6** was obtained in 69% yield as a white solid after column chromatography (eluent = Petroleum ether/ acetone 3:1 v/v).  $R_F$  = 0.43 (PE:acetone = 1:1).  $^1\text{H}$  NMR (400 MHz, Acetone- $d_6$ )  $\delta$  7.47 (dd,  $J$  = 8.0, 1.7 Hz, 2H), 7.34 – 7.26 (m, 3H), 5.89 (d,  $J$  = 5.8 Hz, 1H), 4.35 (d,  $J$  = 17.3 Hz, 1H), 4.27 (d,  $J$  = 16.9 Hz, 1H), 4.18 (d,  $J$  = 17.3 Hz, 1H), 4.12 (d,  $J$  = 16.9 Hz, 1H), 4.09 (d,  $J$  = 5.9 Hz, 1H), 3.37 (s, 3H), 2.06 (s, 3H);  $^{13}\text{C}$  NMR (101 MHz, Acetone- $d_6$ )  $\delta$  169.7, 168.1, 167.9, 140.7, 128.8, 128.6, 128.4, 76.1, 64.5, 64.0, 46.6, 21.3. **ESI-MS**: calcd for  $\text{C}_{15}\text{H}_{17}\text{BINO}_6\text{Na}$   $[\text{M} + \text{Na}]^+$ : 468.0089, found: 468.0095.

**2-(1-bromo-2-hydroxy-2-phenylethyl)-6-methyl-1,3,6,2-dioxazaborocane-4,8-dione (3aa)**

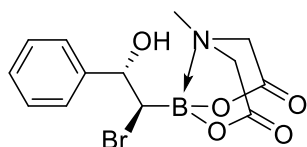

The compound **3aa** was obtained in 36% yield as a white solid after column chromatography (eluent = Petroleum ether/ acetone 3:1 v/v).  $^1\text{H}$  NMR (400 MHz, DMSO- $d_6$ )  $\delta$  7.38 (d,  $J$  = 7.5 Hz, 2H), 7.31 (t,  $J$  = 7.3 Hz, 2H), 7.25 (t,  $J$  = 7.1 Hz, 1H), 5.92 (d,  $J$  = 3.5 Hz, 1H), 4.67 (dd,  $J$  = 8.4, 3.5 Hz, 1H), 4.39 (d,  $J$  = 17.4 Hz, 1H), 4.18 (d,  $J$  = 16.6 Hz, 1H), 4.04 (d,  $J$  = 17.3 Hz, 1H), 4.02 (d,  $J$  = 16.6 Hz, 1H), 3.79 (d,  $J$  = 8.3 Hz, 1H), 3.16 (s, 3H);  $^{13}\text{C}$  NMR (101 MHz, DMSO- $d_6$ )  $\delta$  168.6, 143.9, 127.5, 127.4, 127.2, 74.7, 63.7, 62.6, 46.4.

**2-(2-hydroxy-1-iodo-2-phenylethyl)-6-methyl-1,3,6,2-dioxazaborocane-4,8-dione (4aa)**

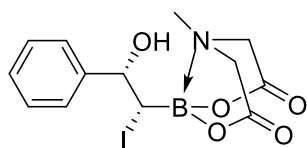

The compound **4aa** was obtained in 51% yield as a yellow solid after recrystallized from EtOAc.  $^1\text{H}$  NMR (500 MHz, DMSO- $d_6$ )  $\delta$  7.34 (d,  $J$  = 7.7 Hz, 2H), 7.30 (t,  $J$  = 7.5 Hz, 2H), 7.21 (t,  $J$  = 7.2 Hz, 1H), 5.45 (s, 1H), 4.48 (s, 1H), 4.40 (d,  $J$  = 17.3 Hz, 1H), 4.24

(d,  $J = 16.9$  Hz, 1H), 4.09 (d,  $J = 17.3$  Hz, 1H), 4.00 (d,  $J = 16.9$  Hz, 1H), 3.69 (s, 1H), 3.12 (s, 3H);  $^{13}\text{C}$  NMR (126 MHz, DMSO- $d_6$ )  $\delta$  168.7, 168.4, 146.6, 127.5, 126.5, 125.7, 70.8, 62.9, 62.8, 46.3.

**2-chloro-2-(6-methyl-4,8-dioxo-1,3,6,2-dioxazaborocan-2-yl)-1-phenylethyl 3-nitrobenzoate (8)**

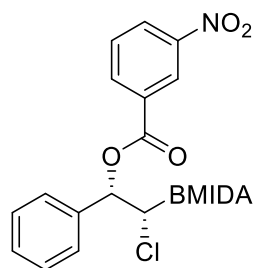

The compound **8** was obtained in 87% yield as a white solid after column chromatography (eluent = Petroleum ether/ acetone 3:1 v/v).  $R_F = 0.57$  (PE:acetone = 1:1).  $^1\text{H}$  NMR (400 MHz, Acetone- $d_6$ )  $\delta$  8.94 (t,  $J = 2.0$  Hz, 1H), 8.64 (dt,  $J = 7.8, 1.3$  Hz, 1H), 8.53 (ddd,  $J = 8.3, 2.4, 1.1$  Hz, 1H), 7.89 (t,  $J = 8.0$  Hz, 1H), 7.48 – 7.46 (m, 2H), 7.37 (t,  $J = 7.3$  Hz, 2H), 7.33 – 7.29 (m, 1H), 6.62 (d,  $J = 3.0$  Hz, 1H), 4.37 (d,  $J = 17.3$  Hz, 1H), 4.29 (d,  $J = 16.7$  Hz, 1H), 4.20 (d,  $J = 3.0$  Hz, 1H), 4.17 (d,  $J = 17.2$  Hz, 1H), 4.16 (d,  $J = 16.6$  Hz, 1H), 3.35 (s, 3H);  $^{13}\text{C}$  NMR (101 MHz, Acetone- $d_6$ )  $\delta$  168.6, 168.0, 164.1, 149.5, 139.9, 136.7, 132.9, 131.2, 129.1, 128.8, 128.6, 127.3, 125.4, 77.5, 63.9, 63.6, 46.6. **ESI-MS**: calcd for  $\text{C}_{20}\text{H}_{18}\text{BClN}_2\text{O}_8\text{Na}$   $[\text{M} + \text{Na}]^+$ : 483.0741, found: 483.0740.

## 9. X-ray crystal structure data of compounds **3b** and **4e**

### X-ray crystallographic data of compound **3b** (CCDC: 1956104)

Crystal data for **3b**: chemical formula weight<sub>370.02</sub>,  $M = 370.02$ , colourless needle,  $0.4 \times 0.05 \times 0.05$  mm<sup>3</sup>, space group  $C 1 2/c 1$  (No. 15),  $V = 3041.05(13)$  Å<sup>3</sup>,  $Z = 8$ ,  $D_c = 1.6162$  g/cm<sup>3</sup>,  $F_{000} = 1503.0215$ , Xcalibur, Onyx, Nova, Cu K $\alpha$  radiation,  $\lambda = 1.54184$  Å,  $T = 100\text{K}$ ,  $2\theta_{\text{max}} = 134.1^\circ$ , 6092 reflections collected, 2719 unique ( $R_{\text{int}} = 0.0243$ ). The structure was solved and refined using the programs XS (Sheldrick, 2008) and olex2.refine (Bourhis et al., 2015) respectively. The program X-Seed (Barbour, 1999) was used as an interface to the SHELX programs, and to prepare the figures. Final  $GooF = 1.0609$ ,  $RI = 0.0276$ ,  $wR2 = 0.0740$ ,  $R$  indices based on 2563 reflections with



I  $I > 2\sigma(I)$  (refinement on  $F^2$ ), 202 parameters, 0 restraints. Lp and absorption corrections applied,  $\mu = 3.894 \text{ mm}^{-1}$ .

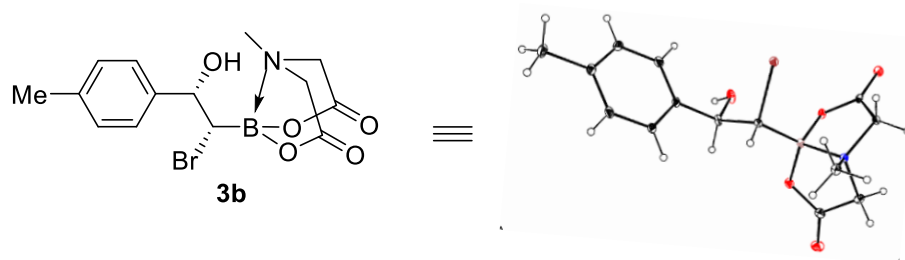

**Table 1 Crystal data and structure refinement for compound 3b.**

|                                                |                                                                                                                |
|------------------------------------------------|----------------------------------------------------------------------------------------------------------------|
| Identification code                            | compound <b>3b</b>                                                                                             |
| Empirical formula                              | C <sub>17.88</sub> H <sub>16.25</sub> N <sub>1.63</sub> O <sub>1.63</sub> Br <sub>1.63</sub> B <sub>1.63</sub> |
| Formula weight                                 | 370.02                                                                                                         |
| Temperature/K                                  | 100                                                                                                            |
| Crystal system                                 | monoclinic                                                                                                     |
| Space group                                    | C2/c                                                                                                           |
| a/Å                                            | 21.4754(5)                                                                                                     |
| b/Å                                            | 6.47129(11)                                                                                                    |
| c/Å                                            | 24.0236(6)                                                                                                     |
| $\alpha/^\circ$                                | 90                                                                                                             |
| $\beta/^\circ$                                 | 114.374(3)                                                                                                     |
| $\gamma/^\circ$                                | 90                                                                                                             |
| Volume/Å <sup>3</sup>                          | 3041.05(13)                                                                                                    |
| Z                                              | 8                                                                                                              |
| $\rho_{\text{calc}}/\text{g}/\text{cm}^3$      | 1.6162                                                                                                         |
| $\mu/\text{mm}^{-1}$                           | 3.894                                                                                                          |
| F(000)                                         | 1503.0                                                                                                         |
| Crystal size/mm <sup>3</sup>                   | 0.4 × 0.05 × 0.05                                                                                              |
| Radiation                                      | Cu K $\alpha$ ( $\lambda$ = 1.54184)                                                                           |
| 2 $\theta$ range for data collection/ $^\circ$ | 8.08 to 134.14                                                                                                 |
| Index ranges                                   | -25 ≤ h ≤ 24, -7 ≤ k ≤ 7, -18 ≤ l ≤ 28                                                                         |
| Reflections collected                          | 6092                                                                                                           |
| Independent reflections                        | 2719 [ $R_{\text{int}}$ = 0.0243, $R_{\text{sigma}}$ = 0.0255]                                                 |
| Data/restraints/parameters                     | 2719/0/202                                                                                                     |
| Goodness-of-fit on F <sup>2</sup>              | 1.061                                                                                                          |
| Final R indexes [ $I \geq 2\sigma(I)$ ]        | $R_1$ = 0.0276, $wR_2$ = 0.0740                                                                                |
| Final R indexes [all data]                     | $R_1$ = 0.0292, $wR_2$ = 0.0753                                                                                |
| Largest diff. peak/hole / e Å <sup>-3</sup>    | 0.45/-0.57                                                                                                     |

**Table 2 Fractional Atomic Coordinates ( $\times 10^4$ ) and Equivalent Isotropic Displacement Parameters ( $\text{\AA}^2 \times 10^3$ ) for compound 3b. Ueq is defined as 1/3 of of the trace of the orthogonalised  $U_{ij}$  tensor.**

| <b>Atom</b> | <b><i>x</i></b> | <b><i>y</i></b> | <b><i>z</i></b> | <b>U(eq)</b> |
|-------------|-----------------|-----------------|-----------------|--------------|
| Br1         | 528.97 (10)     | 7350.8 (3)      | 381.88 (9)      | 16.41 (10)   |
| O1          | 2135.6 (8)      | 7175 (2)        | 1210.0 (6)      | 17.2 (3)     |
| O2          | 2427.1 (7)      | 4623 (2)        | 611.0 (6)       | 20.6 (3)     |
| O3          | 2086.3 (8)      | 8248 (3)        | 2076.3 (7)      | 24.7 (3)     |
| O5          | 1683.4 (8)      | 9163 (3)        | -2.8 (7)        | 27.9 (4)     |
| O6          | 3244.2 (9)      | 2210 (3)        | 939.6 (9)       | 34.5 (4)     |
| N7          | 1785.6 (8)      | 3648 (3)        | 1199.9 (7)      | 14.3 (3)     |
| C8          | 2762.5 (11)     | 3055 (4)        | 971.1 (10)      | 21.6 (4)     |
| C9          | 1215.5 (10)     | 5983 (3)        | 151.7 (9)       | 16.4 (4)     |
| C10         | 1993.7 (10)     | 6926 (3)        | 1691.0 (9)      | 17.0 (4)     |
| C11         | 439.7 (12)      | 9676 (4)        | -1049.2 (10)    | 24.1 (5)     |
| C12         | 1219.9 (11)     | 2142 (3)        | 900.6 (10)      | 19.0 (4)     |
| C13         | 1360.8 (12)     | 7315 (3)        | -308 (1)        | 20.0 (5)     |
| C14         | -430.1 (11)     | 8384 (4)        | -2003.2 (9)     | 23.9 (5)     |
| C15         | -130.2 (12)     | 9988 (4)        | -1596.3 (10)    | 26.7 (5)     |
| C16         | 434.6 (10)      | 6100 (3)        | -1300.5 (9)     | 18.8 (4)     |
| C17         | -134.4 (11)     | 6426 (4)        | -1842.4 (9)     | 21.4 (5)     |
| C18         | 1698.3 (10)     | 4818 (3)        | 1697.3 (9)      | 17.1 (4)     |
| C19         | 727.6 (12)      | 7722 (3)        | -896.2 (10)     | 18.8 (5)     |
| C20         | -1046.8 (12)    | 8738 (5)        | -2596.6 (10)    | 33.6 (6)     |
| C21         | 2462.6 (12)     | 2538 (3)        | 1421.4 (11)     | 20.4 (5)     |
| B22         | 1879.7 (11)     | 5461 (4)        | 761.4 (10)      | 15.6 (4)     |

**Table 3 Anisotropic Displacement Parameters ( $\text{\AA}^2 \times 10^3$ ) for 3b. The Anisotropic displacement factor exponent takes the form:  $-2\pi^2[h^2a^{*2}U_{11}+2hka^*b^*U_{12}+\dots]$ .**

| Atom | $U_{11}$   | $U_{22}$   | $U_{33}$   | $U_{12}$  | $U_{13}$  | $U_{23}$  |
|------|------------|------------|------------|-----------|-----------|-----------|
| Br1  | 15.71 (15) | 18.59 (15) | 14.37 (15) | -0.64 (7) | 5.64 (11) | -0.59 (7) |
| O1   | 18.9 (8)   | 18.4 (7)   | 12.4 (7)   | -3.5 (6)  | 4.7 (6)   | -0.8 (5)  |
| O2   | 18.3 (7)   | 28.4 (8)   | 17.7 (7)   | 0.9 (6)   | 10.0 (6)  | 0.7 (6)   |
| O3   | 31.1 (8)   | 22.1 (8)   | 16.4 (7)   | 0.3 (7)   | 5.3 (7)   | -5.5 (6)  |
| O5   | 35.6 (9)   | 31.5 (9)   | 17.7 (7)   | -16.3 (7) | 11.9 (7)  | -0.5 (6)  |
| O6   | 24.1 (9)   | 43.5 (11)  | 39.7 (11)  | 8.9 (8)   | 17.0 (9)  | -1.6 (8)  |
| N7   | 14.0 (8)   | 14.3 (8)   | 13.8 (8)   | -0.9 (7)  | 4.9 (7)   | -0.6 (6)  |
| C8   | 16.2 (10)  | 25.1 (11)  | 21.0 (11)  | -0.9 (9)  | 5.2 (9)   | -4.5 (9)  |
| C9   | 18 (1)     | 18 (1)     | 14.3 (9)   | 0.6 (8)   | 7.6 (8)   | -0.7 (8)  |
| C10  | 15.1 (10)  | 20.2 (10)  | 11.5 (10)  | 3.3 (8)   | 1.3 (8)   | 2.5 (8)   |
| C11  | 32.9 (12)  | 23.6 (11)  | 19.7 (11)  | 1.8 (10)  | 14.7 (10) | 1.9 (9)   |
| C12  | 16.7 (11)  | 19.1 (10)  | 17.5 (11)  | -5.9 (9)  | 3.5 (9)   | -1.0 (8)  |
| C13  | 21.0 (11)  | 26.3 (12)  | 12.8 (10)  | -3.7 (8)  | 7.0 (9)   | -0.7 (8)  |
| C14  | 19.4 (11)  | 39.4 (14)  | 17.1 (10)  | 6.7 (10)  | 11.7 (9)  | 7.3 (10)  |
| C15  | 33.4 (12)  | 28.2 (12)  | 23.4 (11)  | 11.7 (10) | 16.7 (10) | 10.3 (9)  |
| C16  | 20.4 (10)  | 23.1 (11)  | 14.9 (10)  | 2.4 (9)   | 9.4 (8)   | 2.4 (8)   |
| C17  | 20.5 (10)  | 32.1 (13)  | 13.9 (10)  | 0.4 (9)   | 9.5 (9)   | 0.9 (9)   |
| C18  | 18.8 (10)  | 20.5 (10)  | 12.1 (9)   | 1.0 (8)   | 6.5 (8)   | -0.2 (8)  |
| C19  | 21.1 (11)  | 25.1 (11)  | 13.3 (10)  | 1.9 (8)   | 10.2 (9)  | 4.5 (8)   |
| C20  | 25.4 (12)  | 57.1 (17)  | 19.1 (11)  | 14.5 (12) | 9.9 (10)  | 13.7 (11) |
| C21  | 17.2 (11)  | 19.8 (11)  | 21.7 (12)  | 2.3 (8)   | 5.6 (10)  | 1.9 (8)   |
| B22  | 15 (1)     | 18.5 (11)  | 14 (1)     | -2.1 (9)  | 6.8 (9)   | -0.3 (9)  |

**Table 4 Bond Lengths for 3b.**

| Atom | Atom | Length/ $\text{\AA}$ | Atom | Atom | Length/ $\text{\AA}$ |
|------|------|----------------------|------|------|----------------------|
| Br1  | C9   | 1.9841 (19)          | C8   | C21  | 1.507 (3)            |
| O1   | C10  | 1.321 (3)            | C9   | C13  | 1.531 (3)            |
| O1   | B22  | 1.485 (3)            | C9   | B22  | 1.603 (3)            |
| O2   | C8   | 1.335 (3)            | C10  | C18  | 1.508 (3)            |
| O2   | B22  | 1.469 (2)            | C11  | C15  | 1.392 (3)            |
| O3   | C10  | 1.215 (3)            | C11  | C19  | 1.389 (3)            |
| O5   | C13  | 1.424 (3)            | C13  | C19  | 1.526 (3)            |
| O6   | C8   | 1.200 (3)            | C14  | C15  | 1.389 (4)            |
| N7   | C12  | 1.490 (3)            | C14  | C17  | 1.398 (4)            |
| N7   | C18  | 1.490 (2)            | C14  | C20  | 1.510 (3)            |
| N7   | C21  | 1.508 (3)            | C16  | C17  | 1.385 (3)            |
| N7   | B22  | 1.644 (3)            | C16  | C19  | 1.391 (3)            |

**Table 5 Bond Angles for 3b.**

| Atom | Atom | Atom | Angle/°     | Atom | Atom | Atom | Angle/°     |
|------|------|------|-------------|------|------|------|-------------|
| B22  | O1   | C10  | 113.21 (16) | C19  | C13  | O5   | 112.96 (18) |
| B22  | O2   | C8   | 113.19 (16) | C19  | C13  | C9   | 113.33 (18) |
| C18  | N7   | C12  | 111.81 (15) | C17  | C14  | C15  | 117.2 (2)   |
| C21  | N7   | C12  | 109.52 (16) | C20  | C14  | C15  | 121.5 (2)   |
| C21  | N7   | C18  | 112.39 (15) | C20  | C14  | C17  | 121.3 (2)   |
| B22  | N7   | C12  | 116.66 (15) | C14  | C15  | C11  | 121.9 (2)   |
| B22  | N7   | C18  | 103.93 (14) | C19  | C16  | C17  | 120.7 (2)   |
| B22  | N7   | C21  | 102.15 (14) | C16  | C17  | C14  | 121.4 (2)   |
| O6   | C8   | O2   | 123.7 (2)   | C10  | C18  | N7   | 105.01 (15) |
| C21  | C8   | O2   | 110.95 (17) | C13  | C19  | C11  | 122.1 (2)   |
| C21  | C8   | O6   | 125.4 (2)   | C16  | C19  | C11  | 118.6 (2)   |
| C13  | C9   | Br1  | 110.23 (14) | C16  | C19  | C13  | 119.31 (19) |
| B22  | C9   | Br1  | 108.82 (12) | C8   | C21  | N7   | 106.05 (17) |
| B22  | C9   | C13  | 114.09 (17) | O2   | B22  | O1   | 111.11 (16) |
| O3   | C10  | O1   | 123.8 (2)   | N7   | B22  | O1   | 100.05 (14) |
| C18  | C10  | O1   | 111.65 (17) | N7   | B22  | O2   | 102.51 (16) |
| C18  | C10  | O3   | 124.54 (19) | C9   | B22  | O1   | 115.42 (17) |
| C19  | C11  | C15  | 120.2 (2)   | C9   | B22  | O2   | 110.71 (15) |
| C9   | C13  | O5   | 107.57 (16) | C9   | B22  | N7   | 115.94 (16) |

**Table 6 Hydrogen Atom Coordinates ( $\text{\AA} \times 10^4$ ) and Isotropic Displacement Parameters ( $\text{\AA}^2 \times 10^3$ ) for 3b.**

| Atom | <i>x</i>    | <i>y</i>  | <i>z</i>     | U(eq)    |
|------|-------------|-----------|--------------|----------|
| H16  | 626.9 (10)  | 4755 (3)  | -1203.9 (9)  | 22.5 (5) |
| H17  | -328.0 (11) | 5294 (4)  | -2110.4 (9)  | 25.7 (6) |
| H15  | -319.2 (12) | 11336 (4) | -1693.9 (10) | 32.0 (6) |
| H11  | 632.4 (12)  | 10804 (4) | -779.6 (10)  | 29.0 (6) |
| H5   | 1882 (13)   | 9730 (20) | -198 (7)     | 41.9 (6) |
| H9   | 1016 (1)    | 4646 (3)  | -52.9 (9)    | 19.7 (5) |
| H12a | 1221 (5)    | 1116 (14) | 1201.2 (19)  | 28.4 (7) |
| H12b | 781.6 (13)  | 2876 (5)  | 737 (6)      | 28.4 (7) |
| H12c | 1285 (4)    | 1444 (17) | 566 (5)      | 28.4 (7) |
| H13  | 1697.2 (12) | 6552 (3)  | -420.6 (10)  | 24.1 (6) |
| H18a | 1208.8 (10) | 4921 (3)  | 1617.5 (9)   | 20.5 (5) |
| H18b | 1946.9 (10) | 4133 (3)  | 2096.9 (9)   | 20.5 (5) |
| H20c | -1416 (4)   | 9350 (30) | -2511.1 (12) | 50.5 (9) |
| H20b | -925 (3)    | 9680 (20) | -2856 (4)    | 50.5 (9) |
| H20a | -1200 (6)   | 7416 (6)  | -2808 (4)    | 50.5 (9) |
| H21a | 2769.0 (12) | 3014 (3)  | 1836.4 (11)  | 24.4 (6) |
| H21b | 2396.1 (12) | 1028 (3)  | 1433.9 (11)  | 24.4 (6) |

### X-ray crystallographic data of compound **4e** (CCDC: 1526446)

Crystal data for **4e**: chemical formula  $\text{C}_{14}\text{H}_{15}\text{FNO}_4$ ,  $M = 0.4 \times 0.3 \times 0.2 \text{ mm}^3$ , space group  $P 1 2_1/c 1$  (No. 14),  $V = 1992.86(7) \text{ \AA}^3$ ,  $Z = 4$ ,  $D_c = 1.6433 \text{ g/cm}^3$ ,  $F_{000} = 986.6074$ , Xcalibur, Onyx, Nova, Cu  $K\alpha$  radiation,  $\lambda = 1.54184 \text{ \AA}$ ,  $T = 103 \text{ K}$ ,  $2\theta_{\text{max}} = 134.2^\circ$ , 7761 reflections collected, 3447 unique ( $R_{\text{int}} = 0.0629$ ). The structure was solved and refined using the programs SIR2008 (Burla et al., 2007) and olex2.refine (Bourhis et al., 2015) respectively. The program X-Seed (Barbour, 1999) was used as an interface to the SHELX programs, and to prepare the figures. Final  $GooF = 1.0517$ ,  $R1 = 0.0806$ ,  $wR2 = 0.2272$ ,  $R$  indices based on 3147 reflections with  $I \geq 2\sigma(I)$  (refinement on  $F^2$ ), 248 parameters, 0 restraints. Lp and absorption corrections applied,  $\mu = 13.004 \text{ mm}^{-1}$ .

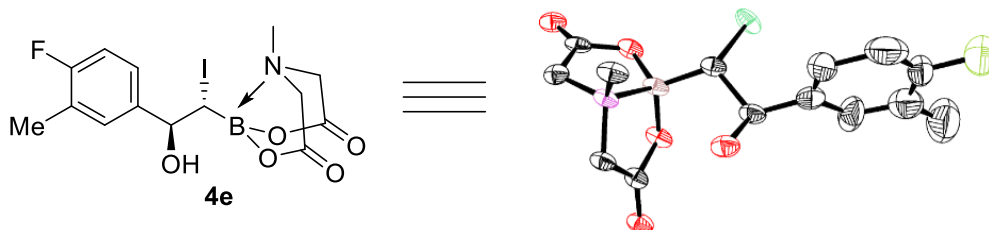

**Table 1 Crystal data and structure refinement for compound 4e.**

|                                             |                                                               |
|---------------------------------------------|---------------------------------------------------------------|
| Identification code                         | Compound <b>4e</b>                                            |
| Empirical formula                           | C <sub>17</sub> H <sub>22</sub> NO <sub>6</sub> IFB           |
| Formula weight                              | 493.09                                                        |
| Temperature/K                               | N/A                                                           |
| Crystal system                              | monoclinic                                                    |
| Space group                                 | P21/c                                                         |
| a/Å                                         | 17.3516(3)                                                    |
| b/Å                                         | 11.2310(2)                                                    |
| c/Å                                         | 10.6444(2)                                                    |
| α/°                                         | 90                                                            |
| β/°                                         | 106.1114(19)                                                  |
| γ/°                                         | 90                                                            |
| Volume/Å <sup>3</sup>                       | 1992.86(7)                                                    |
| Z                                           | 4                                                             |
| ρ <sub>calc</sub> /cm <sup>3</sup>          | 1.6433                                                        |
| μ/mm <sup>-1</sup>                          | 13.004                                                        |
| F(000)                                      | 986.6                                                         |
| Crystal size/mm <sup>3</sup>                | 0.4 × 0.3 × 0.2                                               |
| Radiation                                   | Cu Kα (λ = 1.54184)                                           |
| 2θ range for data collection/°              | 5.3 to 134.16                                                 |
| Index ranges                                | -18 ≤ h ≤ 20, -10 ≤ k ≤ 13, -12 ≤ l ≤ 11                      |
| Reflections collected                       | 7761                                                          |
| Independent reflections                     | 3447 [R <sub>int</sub> = 0.0629, R <sub>sigma</sub> = 0.0540] |
| Data/restraints/parameters                  | 3447/0/248                                                    |
| Goodness-of-fit on F <sup>2</sup>           | 1.052                                                         |
| Final R indexes [I ≥ 2σ (I)]                | R <sub>1</sub> = 0.0806, wR <sub>2</sub> = 0.2272             |
| Final R indexes [all data]                  | R <sub>1</sub> = 0.0844, wR <sub>2</sub> = 0.2355             |
| Largest diff. peak/hole / e Å <sup>-3</sup> | 3.60/-1.75                                                    |

**Table 2 Fractional Atomic Coordinates ( $\times 10^4$ ) and Equivalent Isotropic Displacement Parameters ( $\text{\AA}^2 \times 10^3$ ) for compound 4e. Ueq is defined as 1/3 of of the trace of the orthogonalised  $U_{ij}$  tensor.**

| <b>Atom</b> | <b><i>x</i></b> | <b><i>y</i></b> | <b><i>z</i></b> | <b>U(eq)</b> |
|-------------|-----------------|-----------------|-----------------|--------------|
| I1          | 6798.7 (3)      | 7161.2 (4)      | 10111.0 (5)     | 46.3 (3)     |
| O1          | 3938 (3)        | 5537 (5)        | 8394 (5)        | 41.0 (12)    |
| O2          | 5238 (3)        | 5806 (4)        | 8555 (4)        | 35.5 (10)    |
| O3          | 5885 (3)        | 5642 (4)        | 6832 (4)        | 35.6 (11)    |
| O4          | 7384 (3)        | 4182 (5)        | 8005 (5)        | 42.4 (12)    |
| C5          | 5692 (5)        | 3573 (6)        | 6570 (6)        | 32.6 (14)    |
| O6          | 5915 (3)        | 4863 (4)        | 4901 (4)        | 39.4 (11)    |
| N7          | 5576 (3)        | 3856 (4)        | 7884 (5)        | 28.7 (11)    |
| C8          | 9460 (9)        | 6853 (15)       | 9945 (13)       | 83 (3)       |
| C9          | 6762 (4)        | 5427 (6)        | 9195 (6)        | 32.6 (14)    |
| C10         | 4561 (4)        | 5165 (6)        | 8286 (6)        | 32.9 (15)    |
| C11         | 5991 (5)        | 2945 (6)        | 8890 (7)        | 36.8 (16)    |
| O12         | 7822 (5)        | 11458 (8)       | 10812 (7)       | 80 (2)       |
| C13         | 5842 (4)        | 4744 (6)        | 5993 (6)        | 32.3 (14)    |
| C14         | 4709 (4)        | 3929 (6)        | 7836 (7)        | 34.0 (14)    |
| F15         | 10501 (5)       | 6349 (10)       | 11830 (8)       | 113 (3)      |
| C16         | 7457 (5)        | 5343 (7)        | 8576 (7)        | 39.7 (16)    |
| C17         | 8270 (6)        | 5537 (10)       | 9474 (10)       | 60 (2)       |
| C18         | 7891 (7)        | 11170 (20)      | 8643 (11)       | 107 (6)      |
| C19         | 8709 (7)        | 6550 (12)       | 9227 (15)       | 84 (4)       |
| C20         | 8009 (5)        | 10845 (10)      | 10002 (8)       | 54 (2)       |
| C21         | 8551 (6)        | 4795 (14)       | 10480 (10)      | 75 (4)       |
| C22         | 9714 (5)        | 6128 (10)       | 10994 (10)      | 60 (2)       |
| C23         | 9365 (9)        | 5106 (15)       | 11335 (12)      | 92 (4)       |
| B24         | 5902 (5)        | 5243 (6)        | 8161 (7)        | 31.7 (16)    |
| C25         | 8419 (18)       | 9722 (13)       | 10440 (20)      | 148 (10)     |
| C2          | 9914 (12)       | 7851 (19)       | 9680 (20)       | 128 (8)      |



**Table 3 Anisotropic Displacement Parameters ( $\text{\AA}^2 \times 10^3$ ) for 4e. The Anisotropic displacement factor exponent takes the form:  $-2\pi^2[h^2a^*2U_{11}+2hka^*b^*U_{12}+\dots]$ .**

| Atom | U <sub>11</sub> | U <sub>22</sub> | U <sub>33</sub> | U <sub>12</sub> | U <sub>13</sub> | U <sub>23</sub> |
|------|-----------------|-----------------|-----------------|-----------------|-----------------|-----------------|
| I1   | 50.7 (5)        | 38.1 (4)        | 41.4 (4)        | 7.89 (17)       | -1.5 (3)        | -17.31 (17)     |
| O1   | 56 (3)          | 35 (3)          | 37 (3)          | 9 (2)           | 20 (2)          | -1 (2)          |
| O2   | 51 (3)          | 24 (2)          | 30 (2)          | 8.4 (19)        | 8 (2)           | -3.5 (18)       |
| O3   | 60 (3)          | 17 (2)          | 26 (2)          | 4.5 (19)        | 6 (2)           | 2.1 (17)        |
| O4   | 54 (3)          | 38 (3)          | 40 (3)          | 4 (2)           | 21 (2)          | -6 (2)          |
| C5   | 50 (4)          | 24 (3)          | 25 (3)          | 2 (3)           | 12 (3)          | -3 (2)          |
| O6   | 65 (3)          | 31 (2)          | 22 (2)          | -5 (2)          | 12 (2)          | 2.8 (19)        |
| N7   | 46 (3)          | 19 (2)          | 19 (2)          | 5 (2)           | 5 (2)           | 0.9 (19)        |
| C8   | 82 (8)          | 100 (9)         | 69 (7)          | 8 (7)           | 25 (6)          | -6 (7)          |
| C9   | 49 (4)          | 21 (3)          | 28 (3)          | 4 (3)           | 12 (3)          | -2 (2)          |
| C10  | 57 (4)          | 25 (3)          | 18 (3)          | 7 (3)           | 12 (3)          | 3 (2)           |
| C11  | 64 (5)          | 22 (3)          | 24 (3)          | 8 (3)           | 12 (3)          | 6 (2)           |
| O12  | 100 (6)         | 94 (6)          | 63 (4)          | 40 (5)          | 48 (4)          | 31 (4)          |
| C13  | 45 (4)          | 22 (3)          | 28 (3)          | 1 (3)           | 7 (3)           | 1 (2)           |
| C14  | 51 (4)          | 23 (3)          | 32 (3)          | 0 (3)           | 19 (3)          | 3 (3)           |
| F15  | 72 (5)          | 158 (9)         | 108 (6)         | -11 (5)         | 23 (4)          | -36 (6)         |
| C16  | 55 (4)          | 34 (4)          | 32 (3)          | -2 (3)          | 17 (3)          | -10 (3)         |
| C17  | 57 (5)          | 76 (6)          | 56 (5)          | -3 (4)          | 30 (4)          | -30 (5)         |
| C18  | 62 (7)          | 210 (19)        | 48 (6)          | 52 (9)          | 15 (5)          | 31 (8)          |
| C19  | 59 (6)          | 82 (8)          | 120 (10)        | -28 (6)         | 39 (7)          | -50 (8)         |
| C20  | 36 (4)          | 76 (6)          | 49 (5)          | -15 (4)         | 12 (3)          | -1 (4)          |
| C21  | 43 (5)          | 129 (11)        | 52 (5)          | 9 (6)           | 11 (4)          | -14 (6)         |
| C22  | 44 (5)          | 71 (6)          | 64 (6)          | -10 (4)         | 13 (4)          | -14 (5)         |
| C23  | 101 (9)         | 124 (12)        | 55 (6)          | 23 (9)          | 30 (6)          | -6 (7)          |
| B24  | 56 (5)          | 16 (3)          | 23 (3)          | 4 (3)           | 11 (3)          | -1 (3)          |
| C25  | 300 (30)        | 46 (7)          | 156 (16)        | 1 (11)          | 150 (20)        | 4 (9)           |
| C2   | 87 (12)         | 160 (20)        | 132 (17)        | -28 (11)        | 22 (11)         | 22 (12)         |

**Table 4 Bond Lengths for 4e.**

| Atom | Atom | Length/ $\text{\AA}$ | Atom | Atom | Length/ $\text{\AA}$ |
|------|------|----------------------|------|------|----------------------|
| I1   | C9   | 2.171 (6)            | C8   | C22  | 1.353 (19)           |
| O1   | C10  | 1.193 (9)            | C8   | C2   | 1.44 (2)             |
| O2   | C10  | 1.339 (9)            | C9   | C16  | 1.530 (10)           |
| O2   | B24  | 1.475 (9)            | C9   | B24  | 1.602 (11)           |
| O3   | C13  | 1.335 (8)            | C10  | C14  | 1.514 (9)            |
| O3   | B24  | 1.476 (8)            | O12  | C20  | 1.215 (12)           |
| O4   | C16  | 1.429 (9)            | F15  | C22  | 1.430 (12)           |
| C5   | N7   | 1.501 (8)            | C16  | C17  | 1.485 (13)           |
| C5   | C13  | 1.505 (9)            | C17  | C19  | 1.433 (16)           |
| O6   | C13  | 1.211 (8)            | C17  | C21  | 1.338 (17)           |
| N7   | C11  | 1.510 (8)            | C18  | C20  | 1.450 (14)           |
| N7   | C14  | 1.494 (9)            | C20  | C25  | 1.46 (2)             |
| N7   | B24  | 1.656 (9)            | C21  | C23  | 1.494 (18)           |
| C8   | C19  | 1.358 (19)           | C22  | C23  | 1.391 (19)           |

**Table 5 Bond Angles for 4e.**

| <b>Atom</b> | <b>Atom</b> | <b>Atom</b> | <b>Angle/°</b> | <b>Atom</b> | <b>Atom</b> | <b>Atom</b> | <b>Angle/°</b> |
|-------------|-------------|-------------|----------------|-------------|-------------|-------------|----------------|
| B24         | O2          | C10         | 114.7 (5)      | C9          | C16         | O4          | 104.5 (6)      |
| B24         | O3          | C13         | 113.2 (5)      | C17         | C16         | O4          | 111.4 (7)      |
| C13         | C5          | N7          | 106.2 (5)      | C17         | C16         | C9          | 115.9 (6)      |
| C11         | N7          | C5          | 110.9 (5)      | C19         | C17         | C16         | 117.2 (11)     |
| C14         | N7          | C5          | 111.9 (5)      | C21         | C17         | C16         | 119.6 (10)     |
| C14         | N7          | C11         | 109.9 (5)      | C21         | C17         | C19         | 123.2 (11)     |
| B24         | N7          | C5          | 103.7 (5)      | C17         | C19         | C8          | 124.8 (15)     |
| B24         | N7          | C11         | 116.0 (5)      | C18         | C20         | O12         | 124.9 (11)     |
| B24         | N7          | C14         | 104.2 (5)      | C25         | C20         | O12         | 117.8 (11)     |
| C22         | C8          | C19         | 110.8 (14)     | C25         | C20         | C18         | 117.2 (12)     |
| C2          | C8          | C19         | 125.1 (16)     | C23         | C21         | C17         | 114.5 (13)     |
| C2          | C8          | C22         | 124.0 (15)     | F15         | C22         | C8          | 116.4 (11)     |
| C16         | C9          | I1          | 108.7 (5)      | C23         | C22         | C8          | 130.2 (11)     |
| B24         | C9          | I1          | 109.3 (4)      | C23         | C22         | F15         | 113.0 (11)     |
| B24         | C9          | C16         | 113.0 (5)      | C22         | C23         | C21         | 116.1 (12)     |
| O2          | C10         | O1          | 123.8 (6)      | O3          | B24         | O2          | 109.5 (5)      |
| C14         | C10         | O1          | 126.1 (7)      | N7          | B24         | O2          | 101.5 (5)      |
| C14         | C10         | O2          | 110.2 (6)      | N7          | B24         | O3          | 101.5 (5)      |
| C5          | C13         | O3          | 111.8 (5)      | C9          | B24         | O2          | 113.7 (5)      |
| O6          | C13         | O3          | 123.8 (6)      | C9          | B24         | O3          | 112.7 (6)      |
| O6          | C13         | C5          | 124.4 (6)      | C9          | B24         | N7          | 116.8 (5)      |
| C10         | C14         | N7          | 107.3 (6)      |             |             |             |                |

**Table 6 Hydrogen Atom Coordinates ( $\text{\AA}\times 10^4$ ) and Isotropic Displacement Parameters ( $\text{\AA}^2\times 10^3$ ) for 4e.**

| <b>Atom</b> | <b><i>x</i></b> | <b><i>y</i></b> | <b><i>z</i></b> | <b>U(eq)</b> |
|-------------|-----------------|-----------------|-----------------|--------------|
| H21         | 8264 (6)        | 4139 (14)       | 10636 (10)      | 90 (4)       |
| H23         | 9624 (9)        | 4644 (15)       | 12052 (12)      | 110 (5)      |
| H19         | 8461 (7)        | 7036 (12)       | 8523 (15)       | 101 (5)      |
| H4          | 7410 (60)       | 4230 (12)       | 7250 (30)       | 63.7 (18)    |
| H5a         | 6146 (5)        | 3042 (6)        | 6663 (6)        | 39.2 (17)    |
| H5b         | 5217 (5)        | 3192 (6)        | 6015 (6)        | 39.2 (17)    |
| H9          | 6834 (4)        | 4813 (6)        | 9872 (6)        | 39.1 (17)    |
| H11b        | 5760 (30)       | 2175 (11)       | 8640 (30)       | 55 (2)       |
| H11a        | 6552 (8)        | 2920 (40)       | 8940 (40)       | 55 (2)       |
| H11c        | 5930 (30)       | 3160 (30)       | 9728 (14)       | 55 (2)       |
| H14a        | 4377 (4)        | 3792 (6)        | 6951 (7)        | 40.8 (17)    |
| H14b        | 4579 (4)        | 3333 (6)        | 8404 (7)        | 40.8 (17)    |
| H16         | 7369 (5)        | 5931 (7)        | 7871 (7)        | 47.7 (19)    |
| H18a        | 7460 (60)       | 10710 (90)      | 8100 (16)       | 160 (9)      |
| H18b        | 7760 (90)       | 12000 (30)      | 8530 (30)       | 160 (9)      |
| H18c        | 8380 (30)       | 11030 (130)     | 8400 (40)       | 160 (9)      |
| H25a        | 8830 (90)       | 9600 (100)      | 10000 (170)     | 222 (15)     |
| H25b        | 8660 (120)      | 9750 (80)       | 11360 (40)      | 222 (15)     |
| H25c        | 8040 (30)       | 9080 (30)       | 10200 (200)     | 222 (15)     |
| H2a         | 10420 (40)      | 7580 (30)       | 9610 (170)      | 193 (11)     |
| H2b         | 9620 (50)       | 8220 (100)      | 8870 (90)       | 193 (11)     |
| H2c         | 10000 (90)      | 8420 (80)       | 10380 (90)      | 193 (11)     |

## 10. NMR spectrum of products

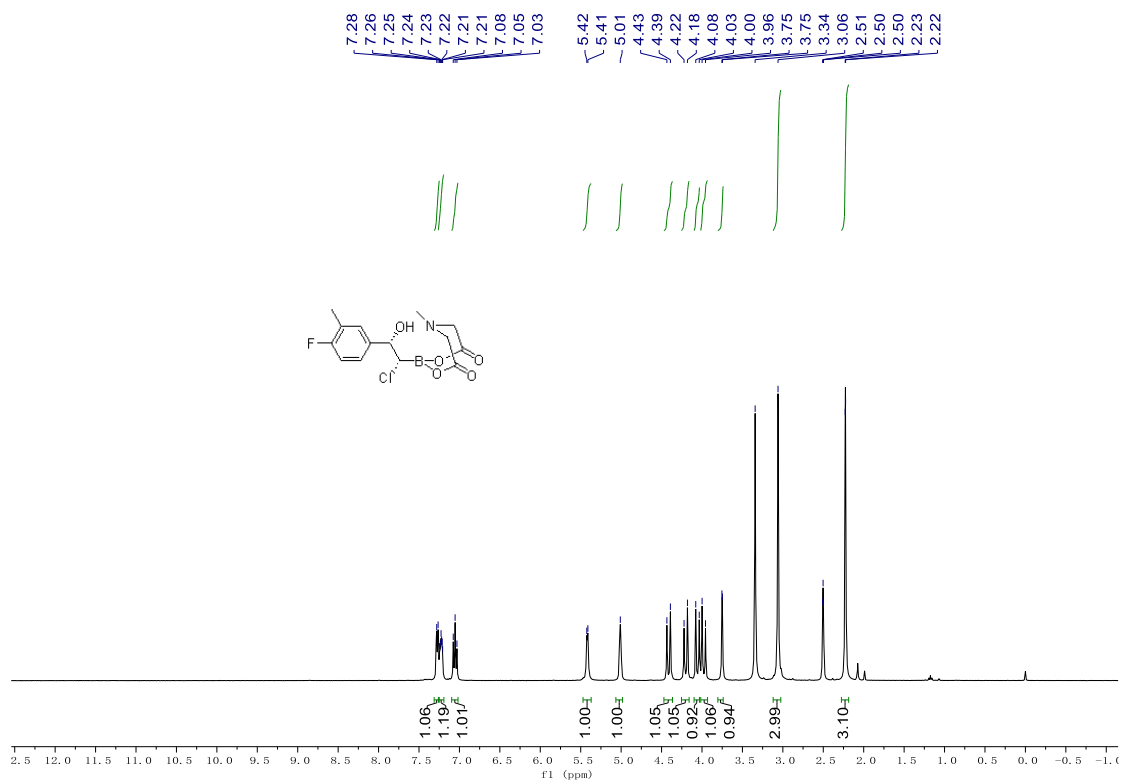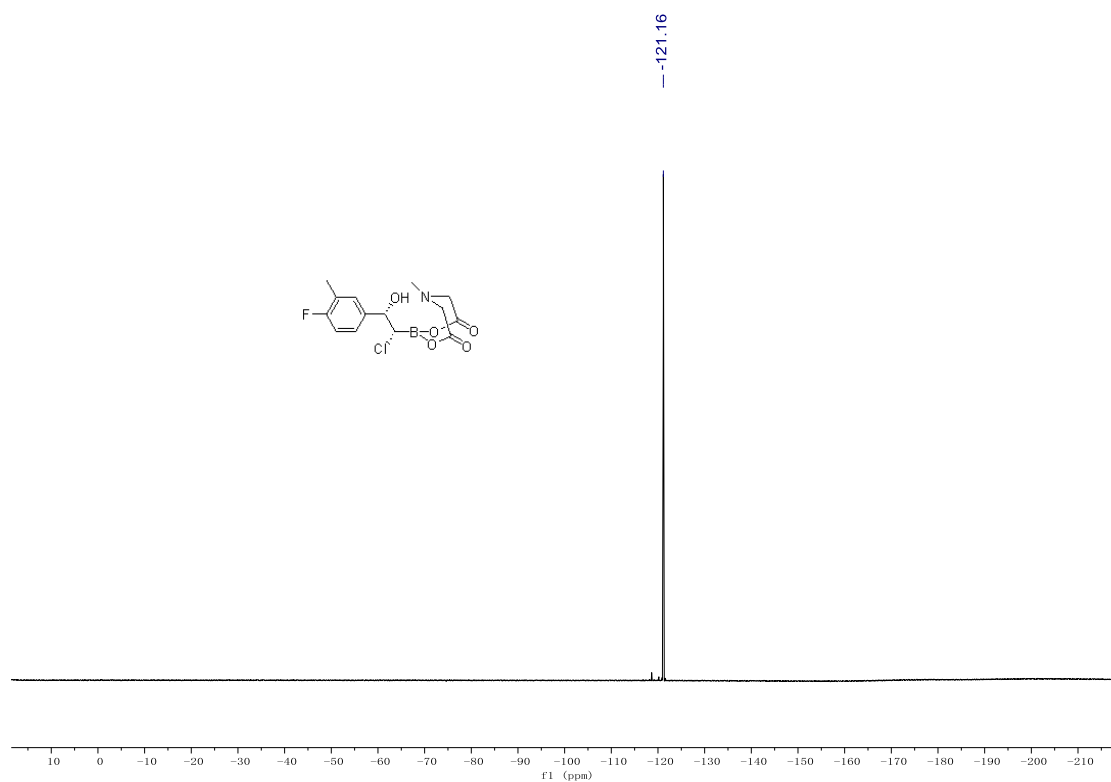

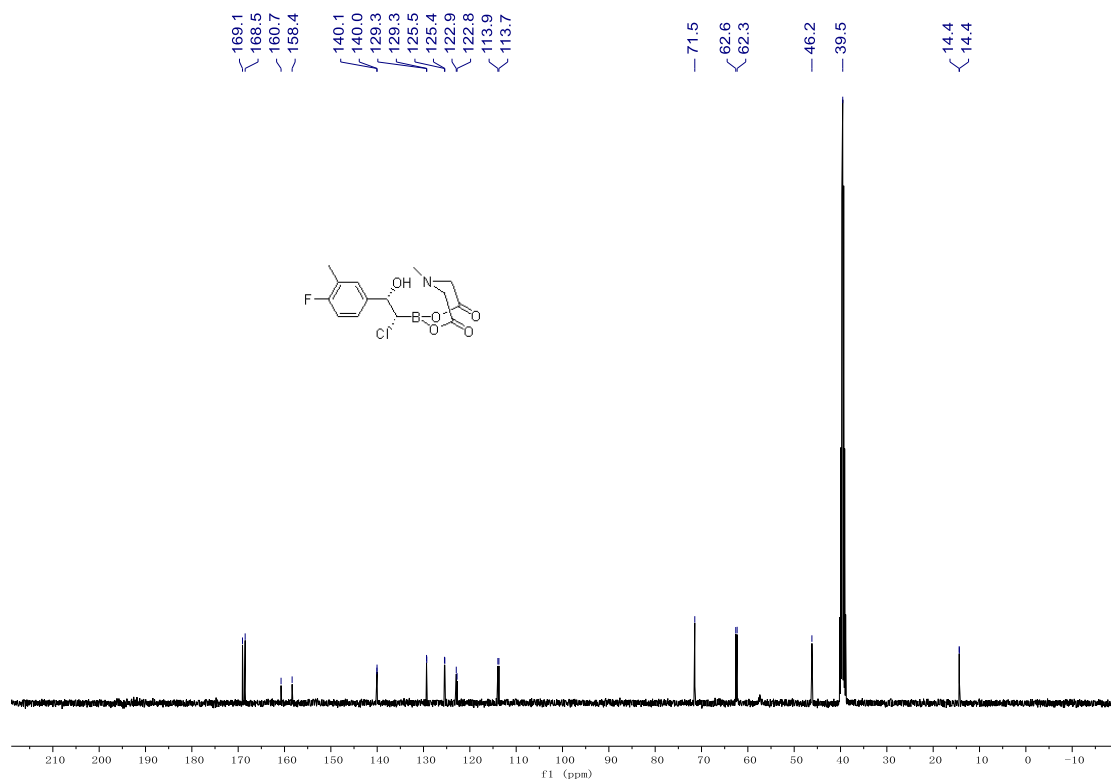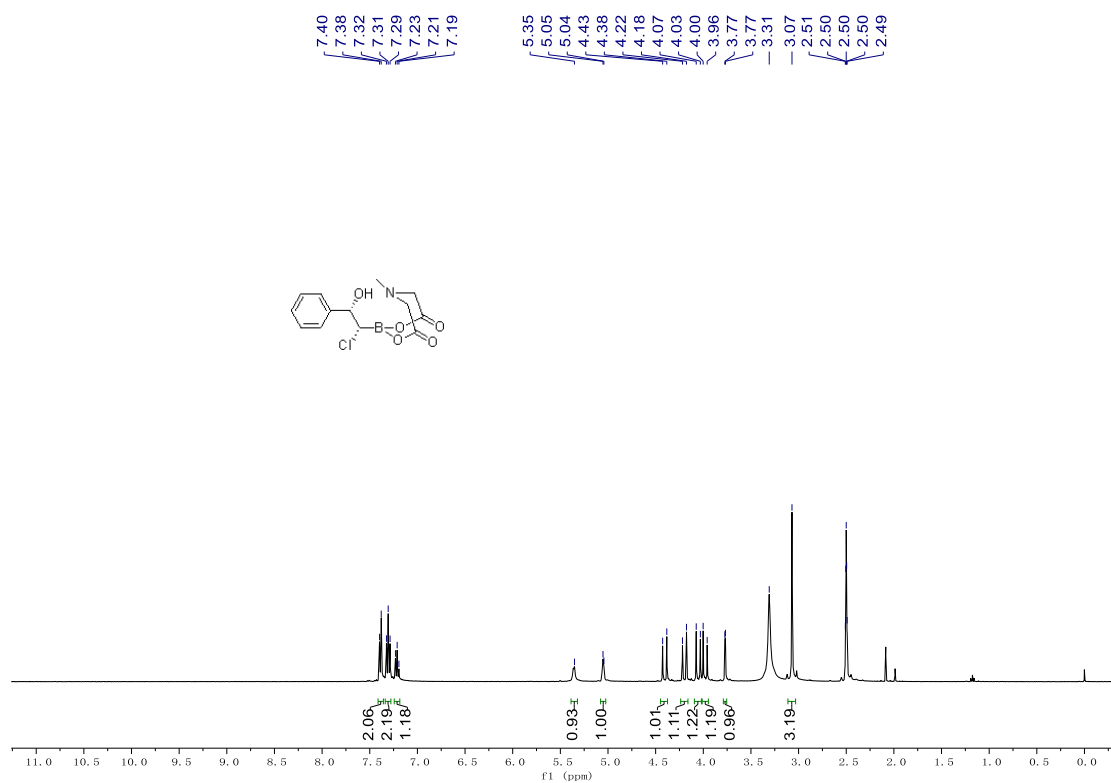

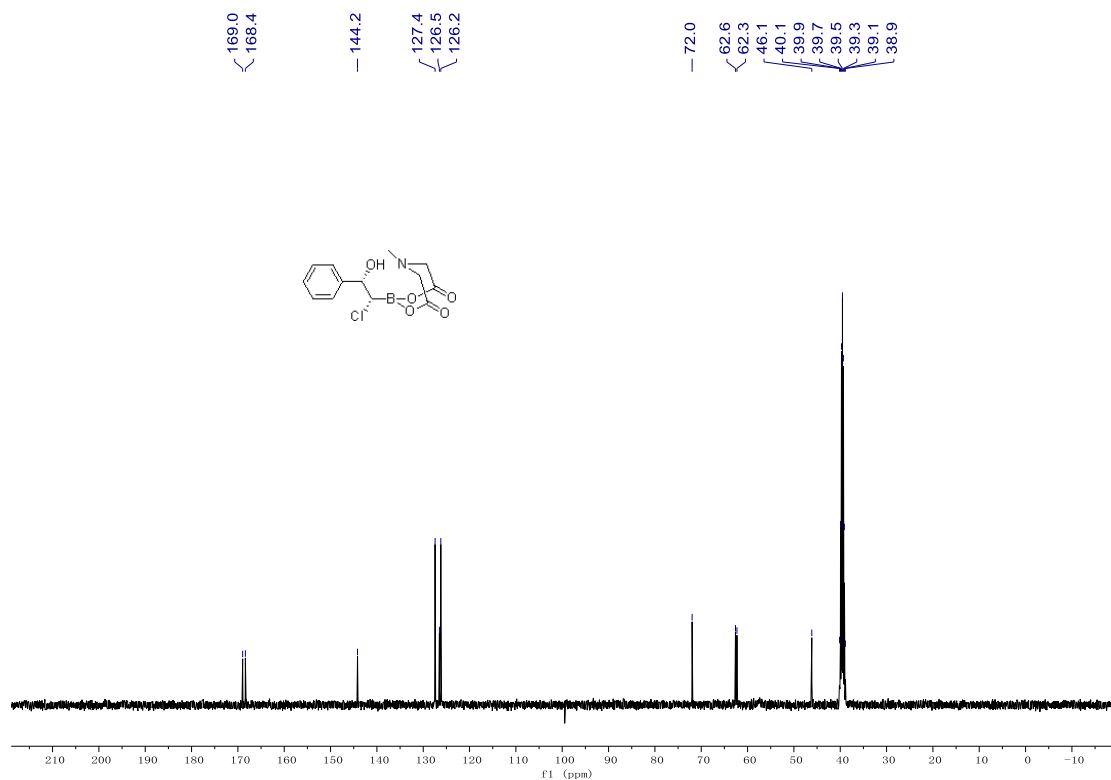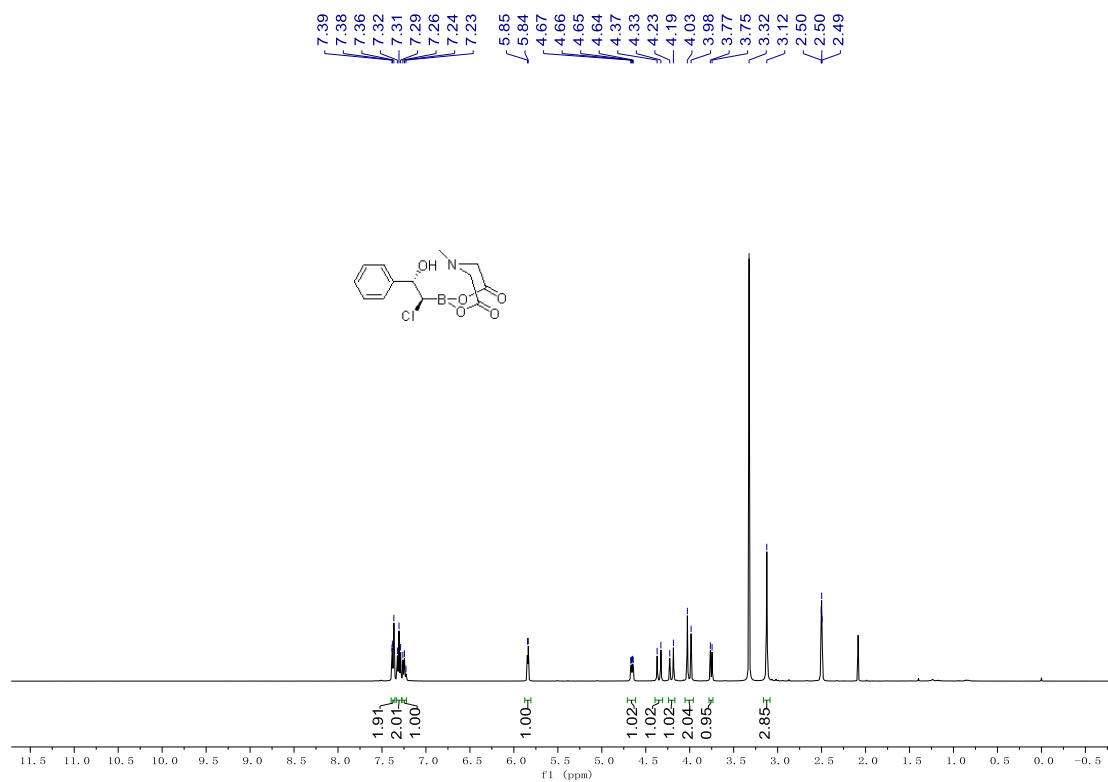

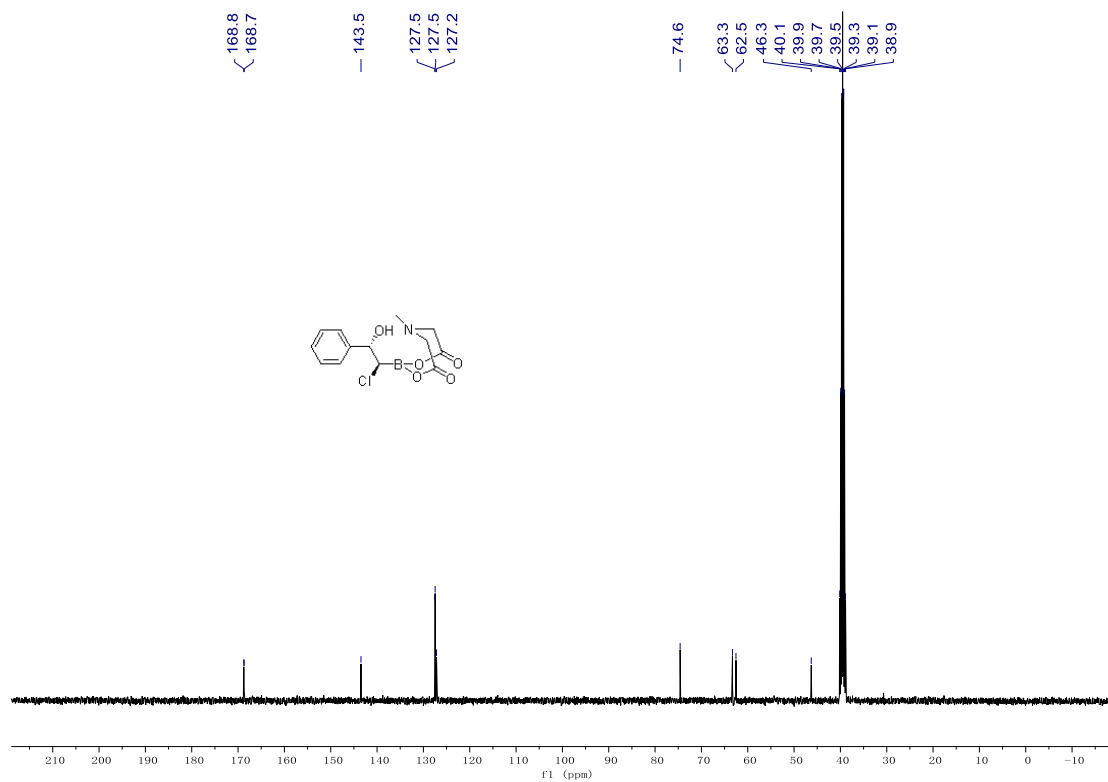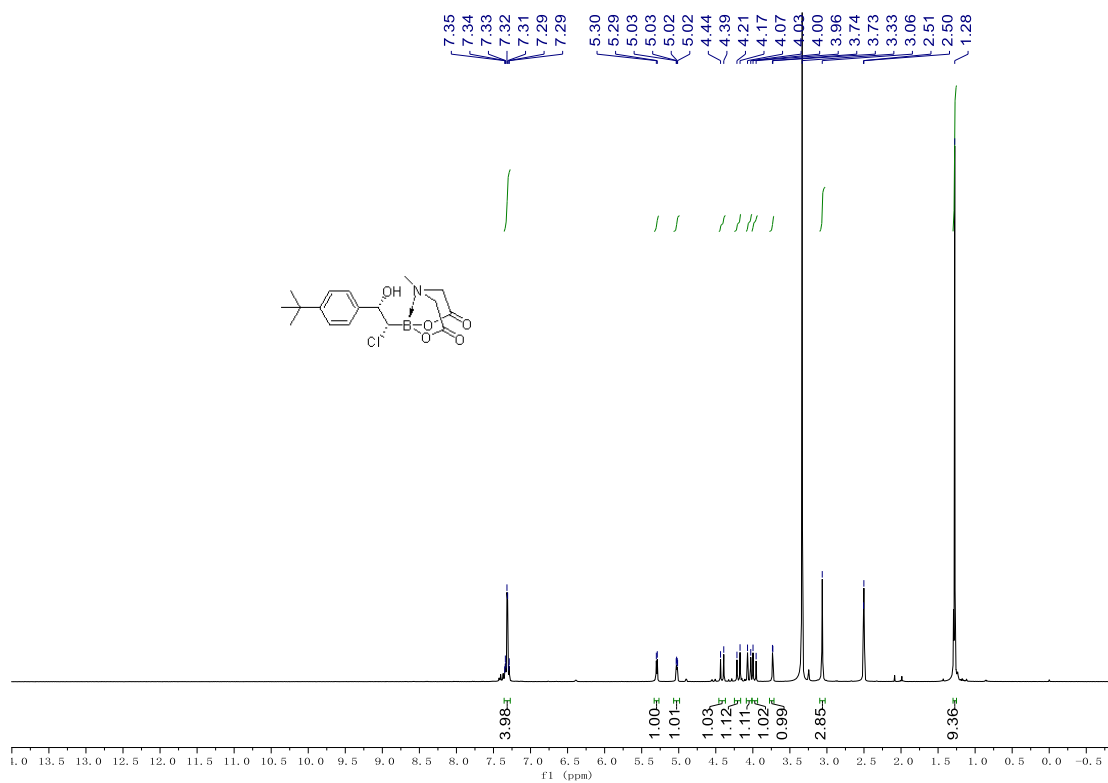

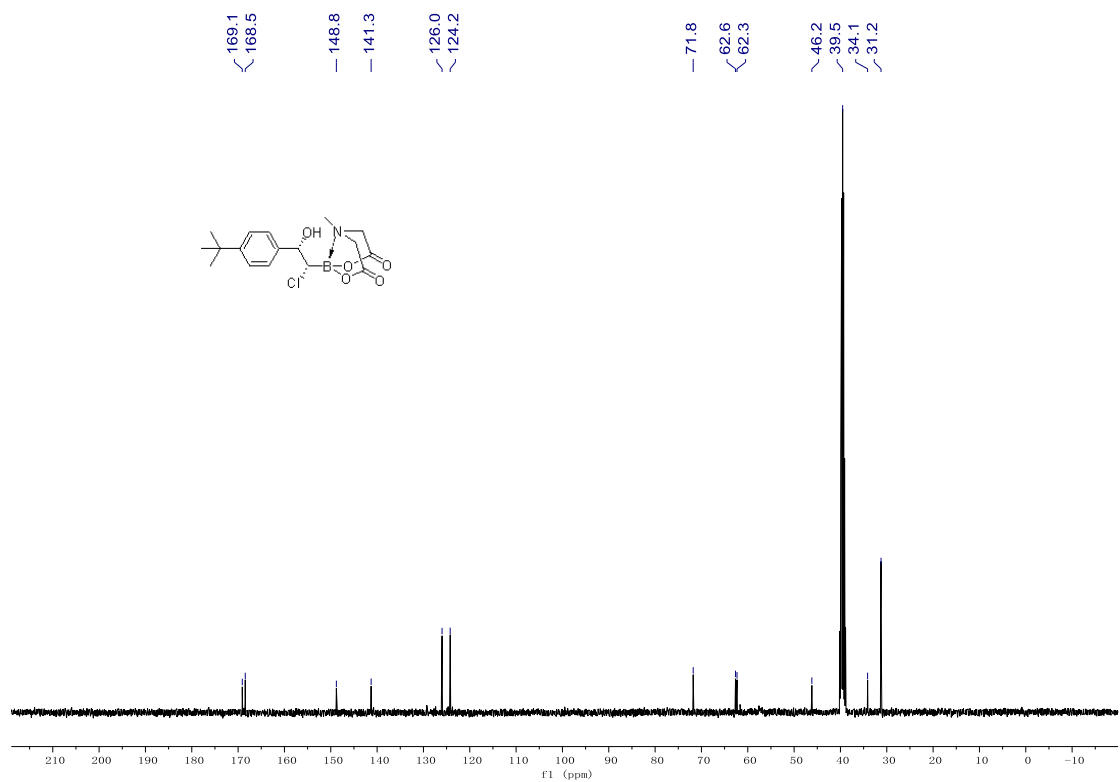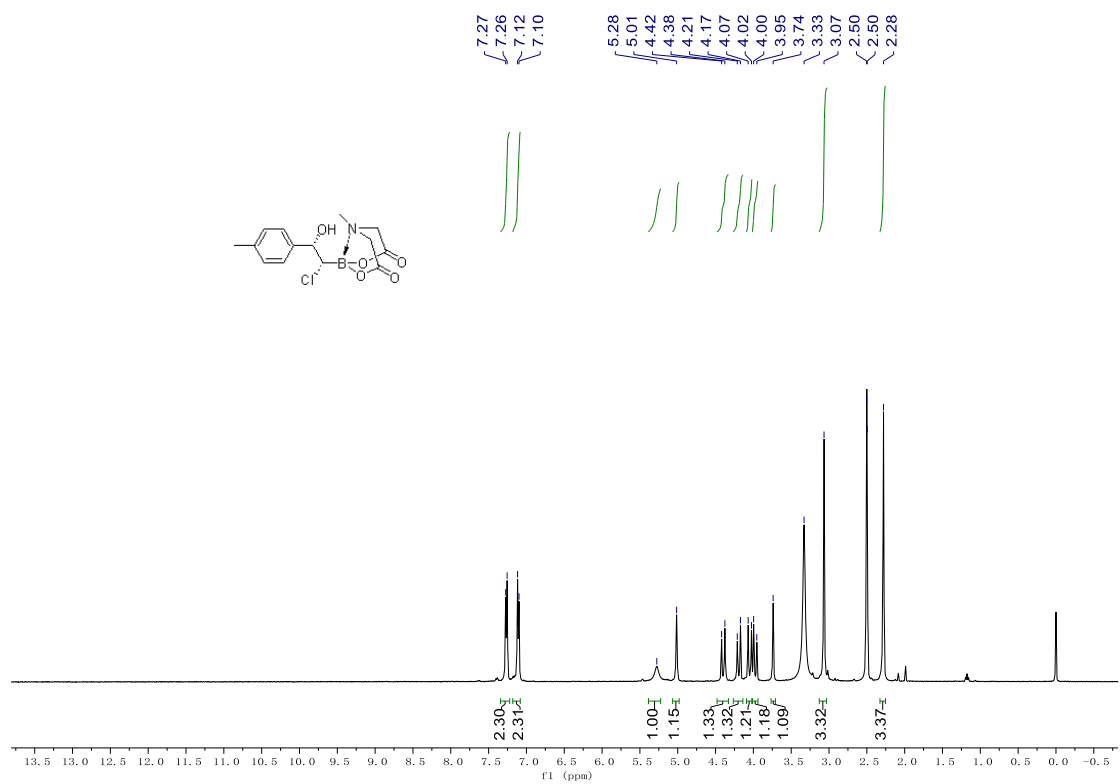



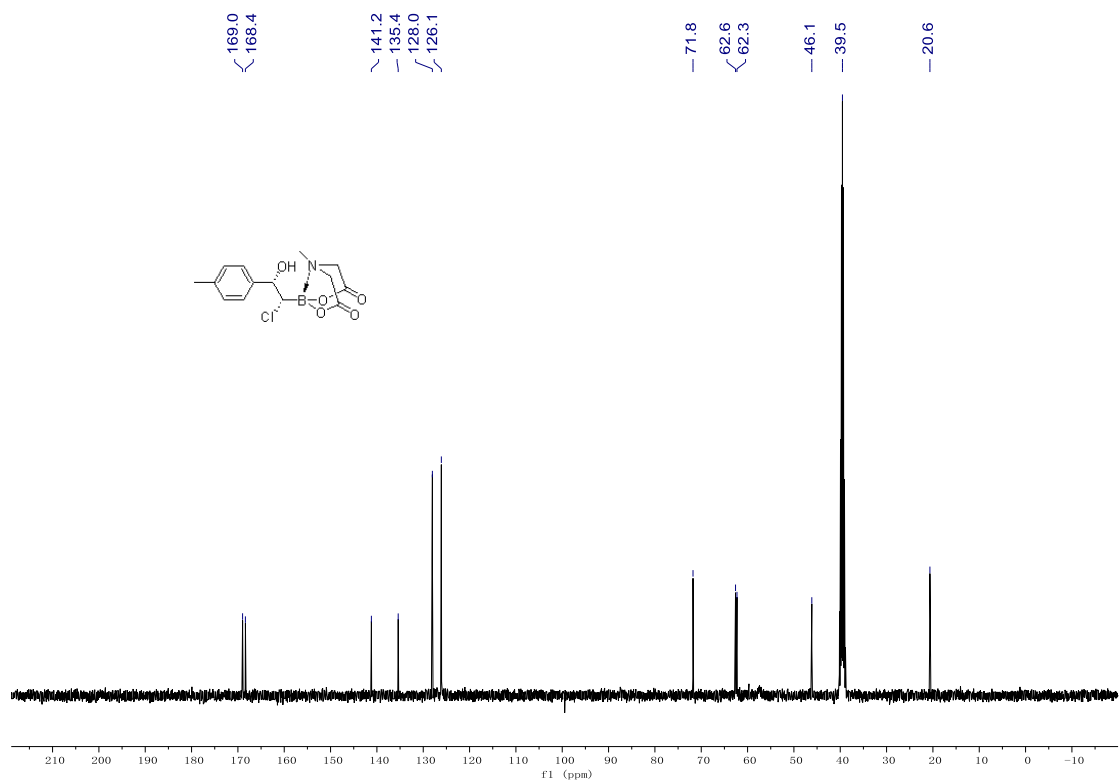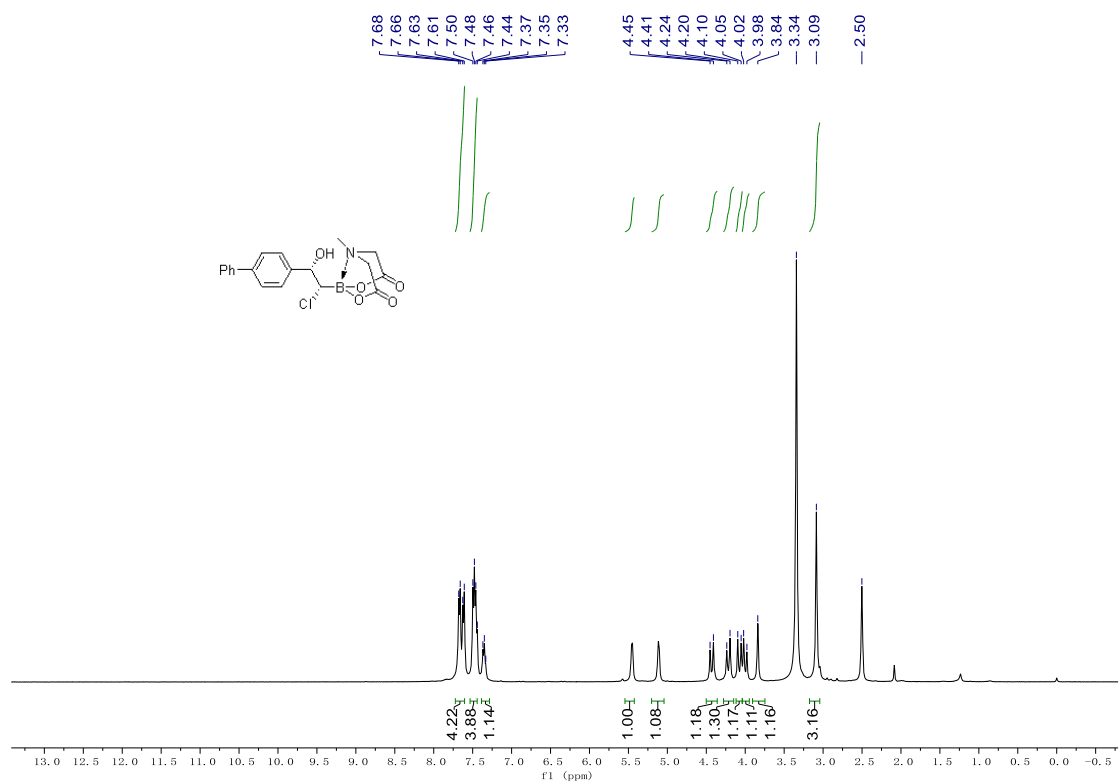

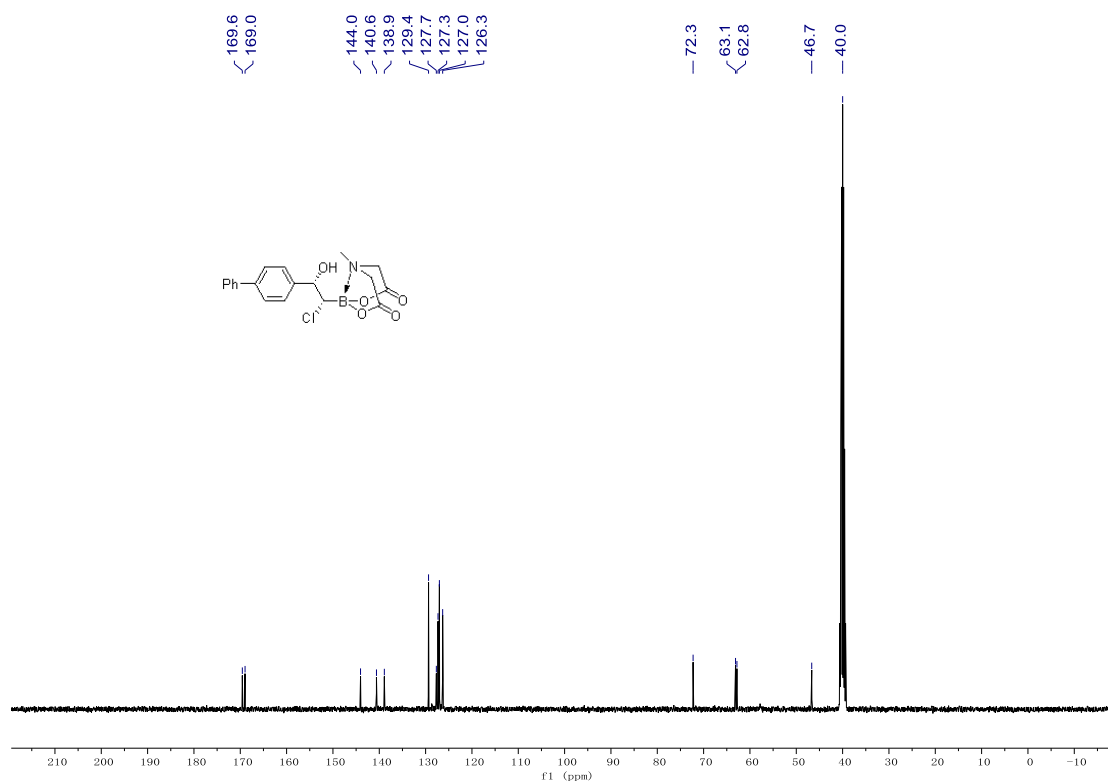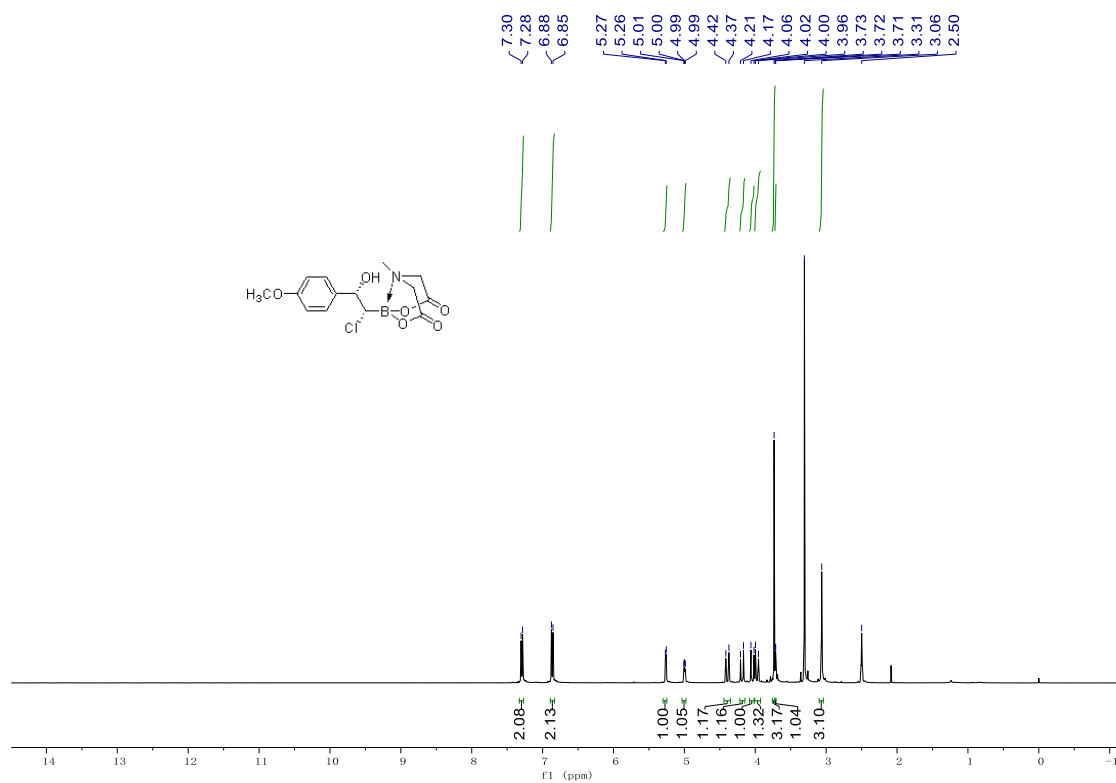

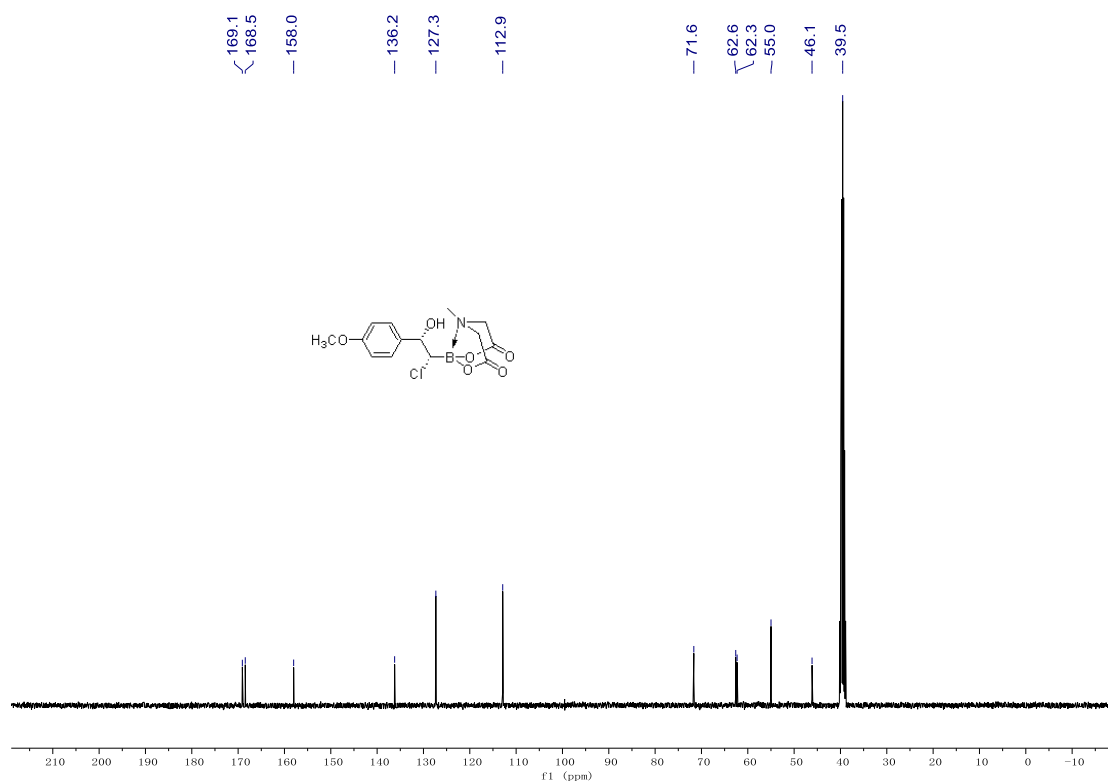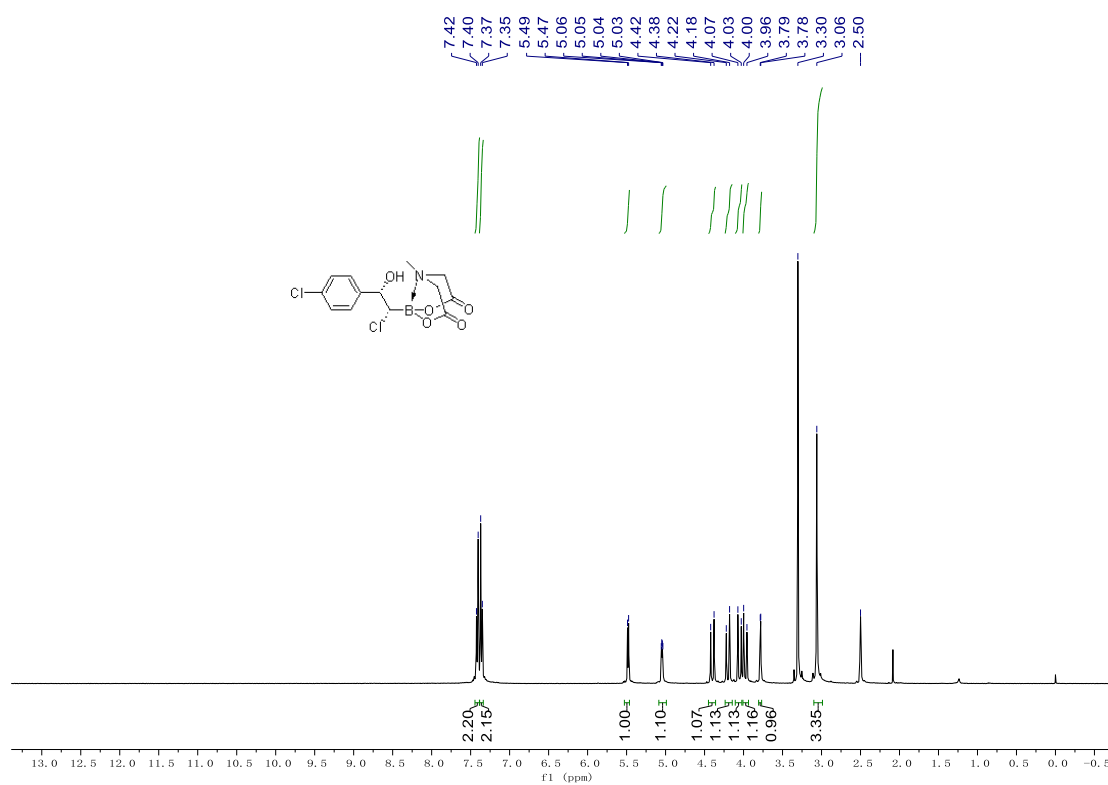

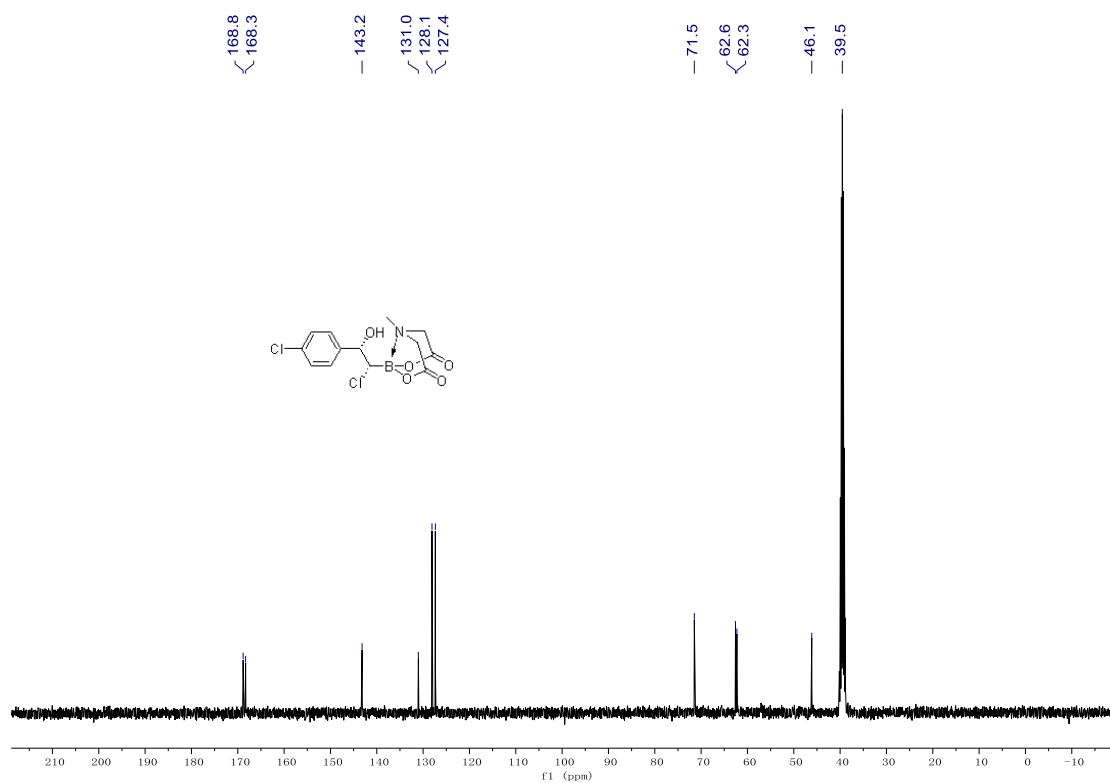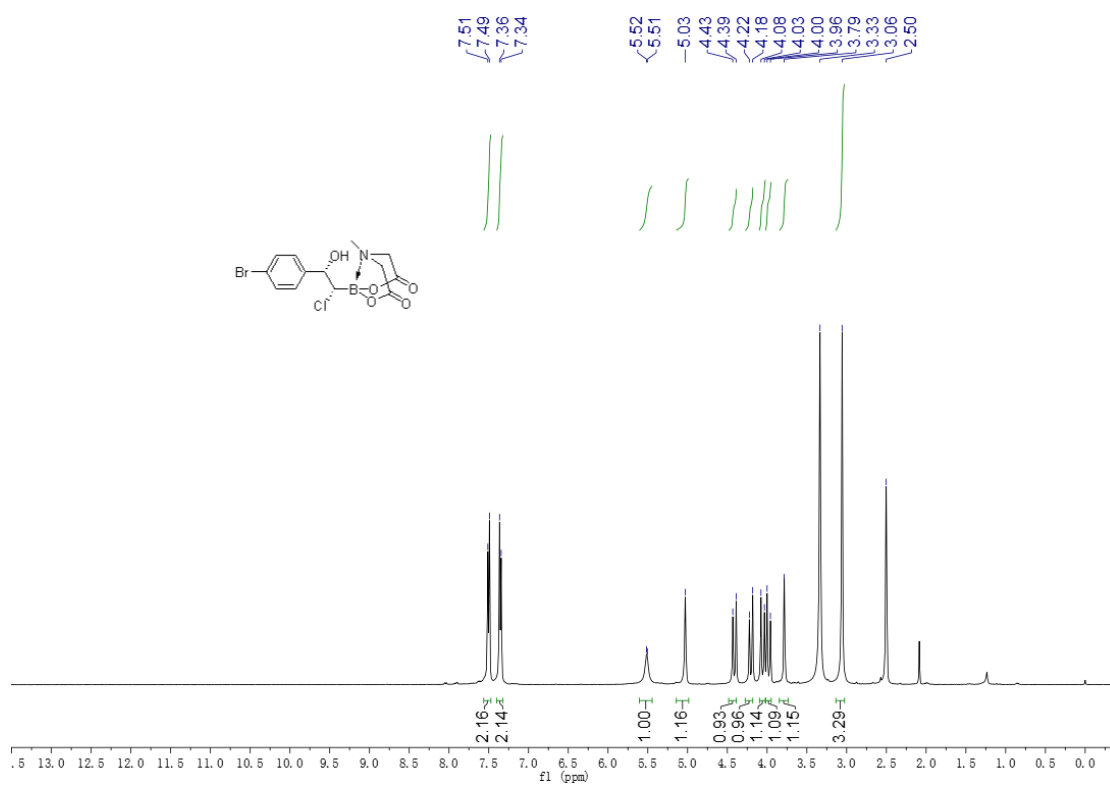

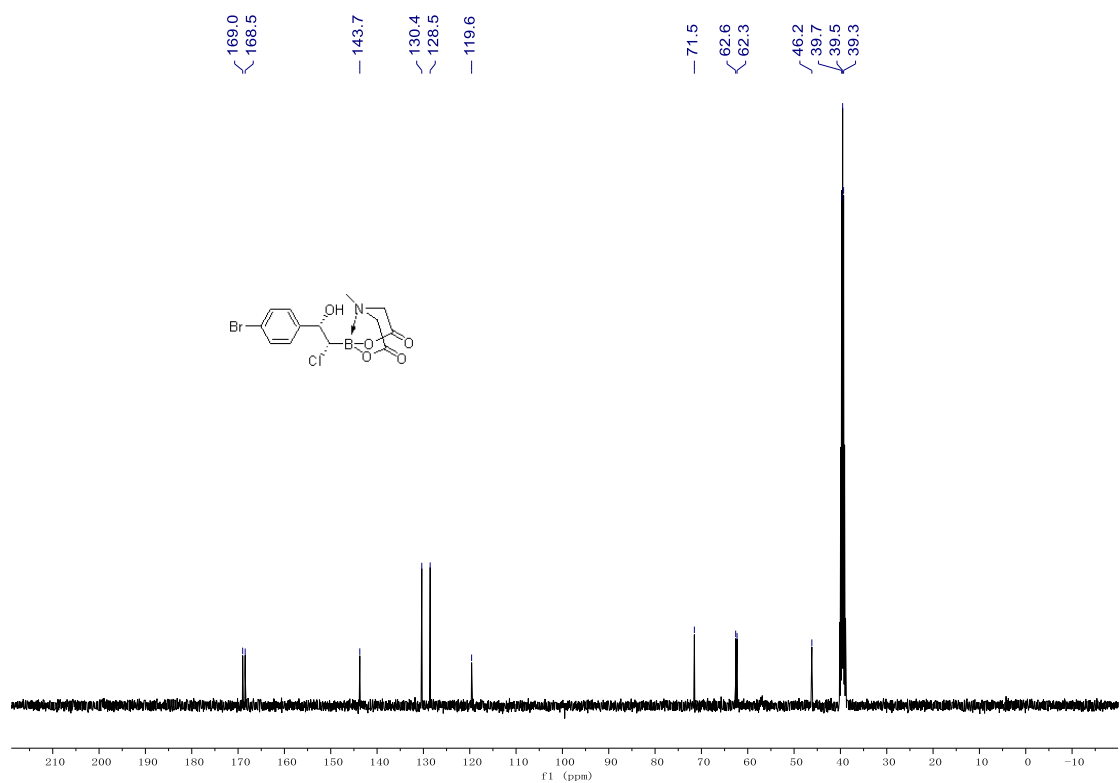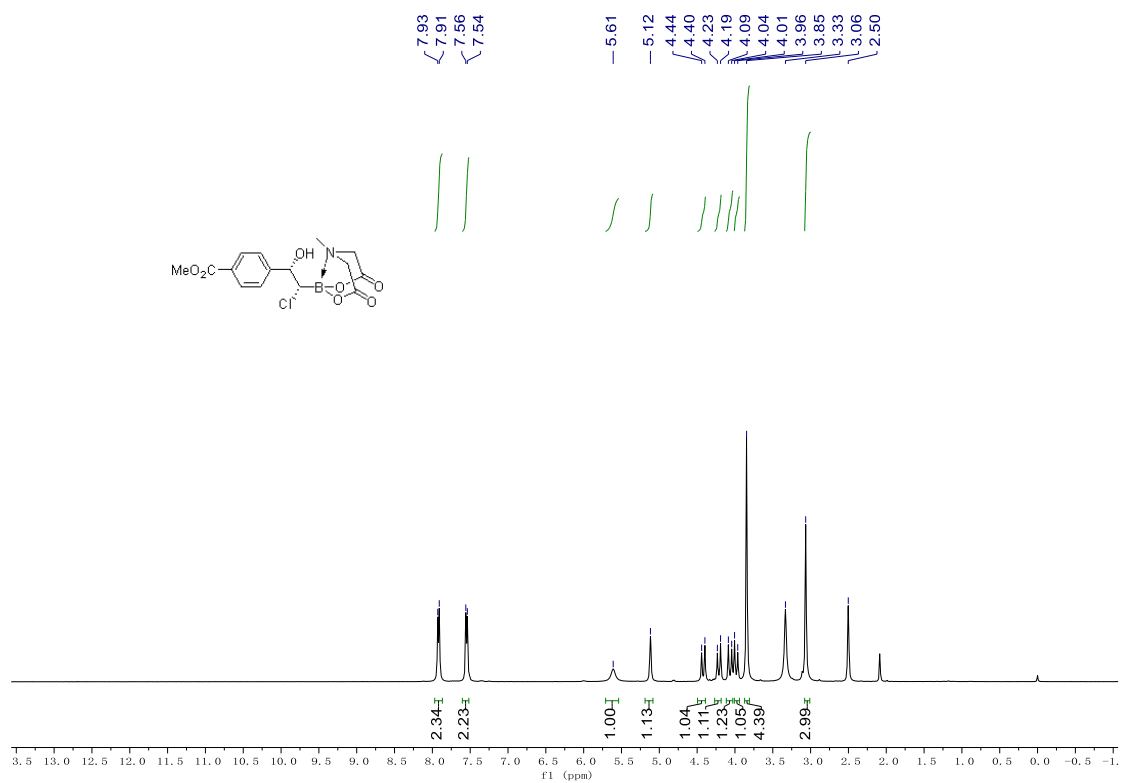

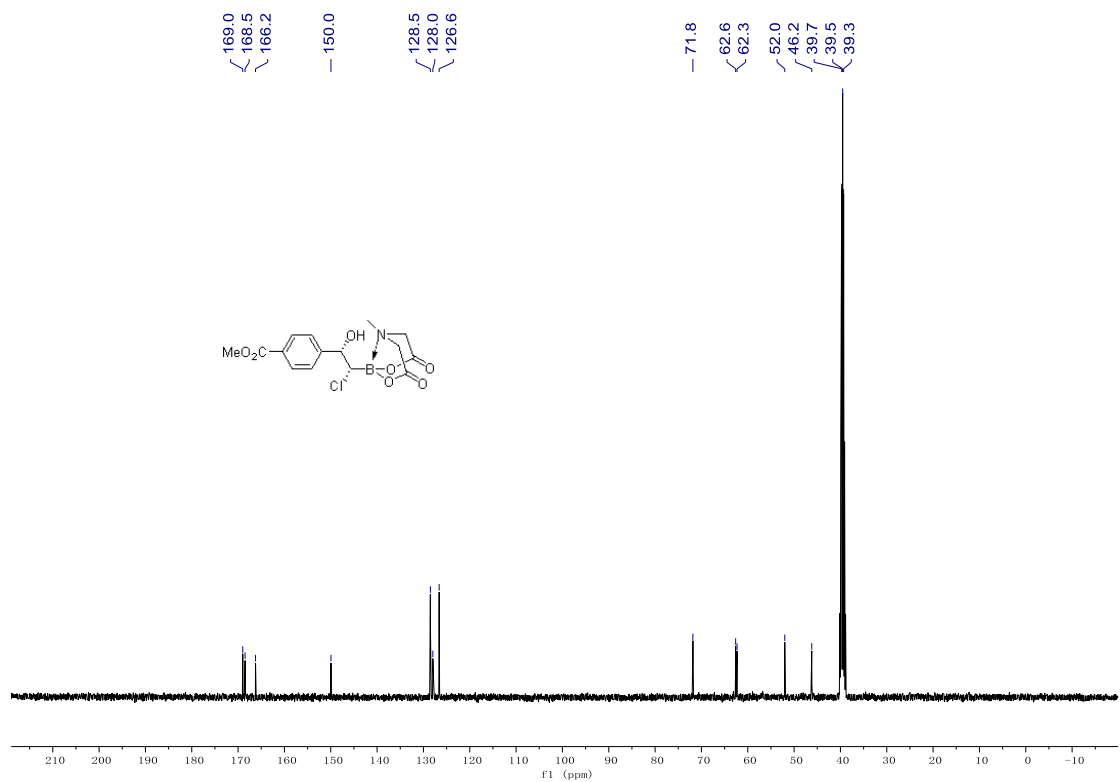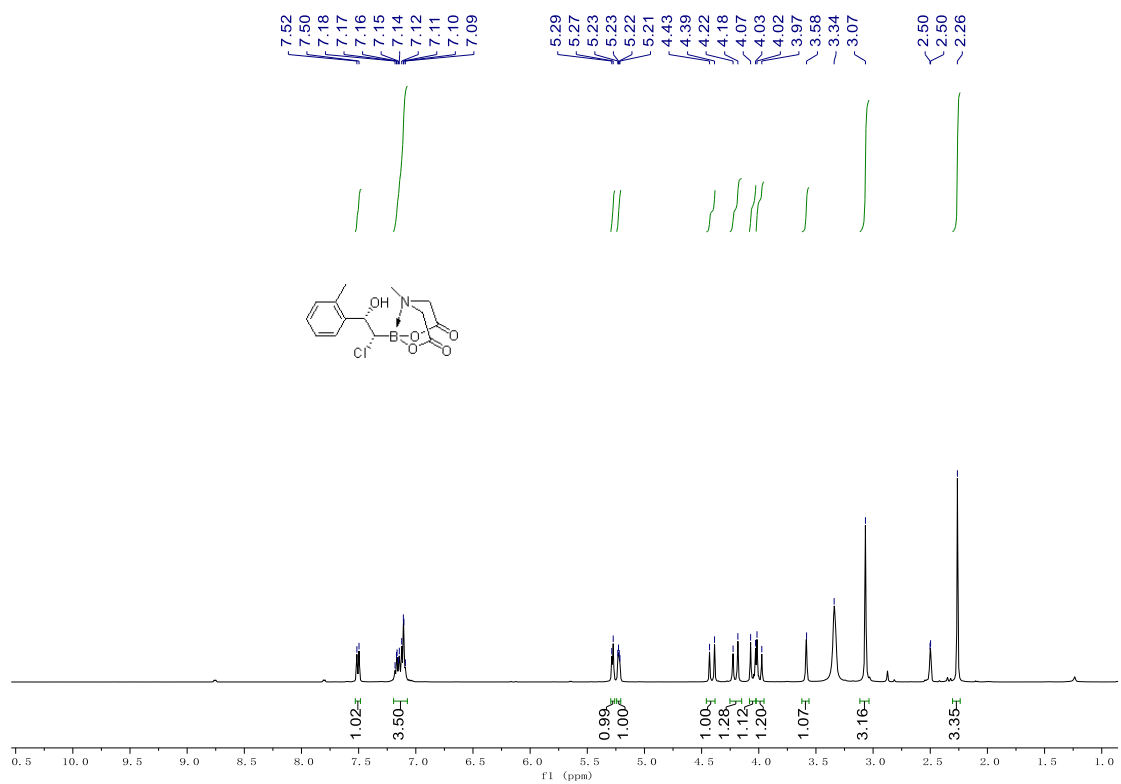

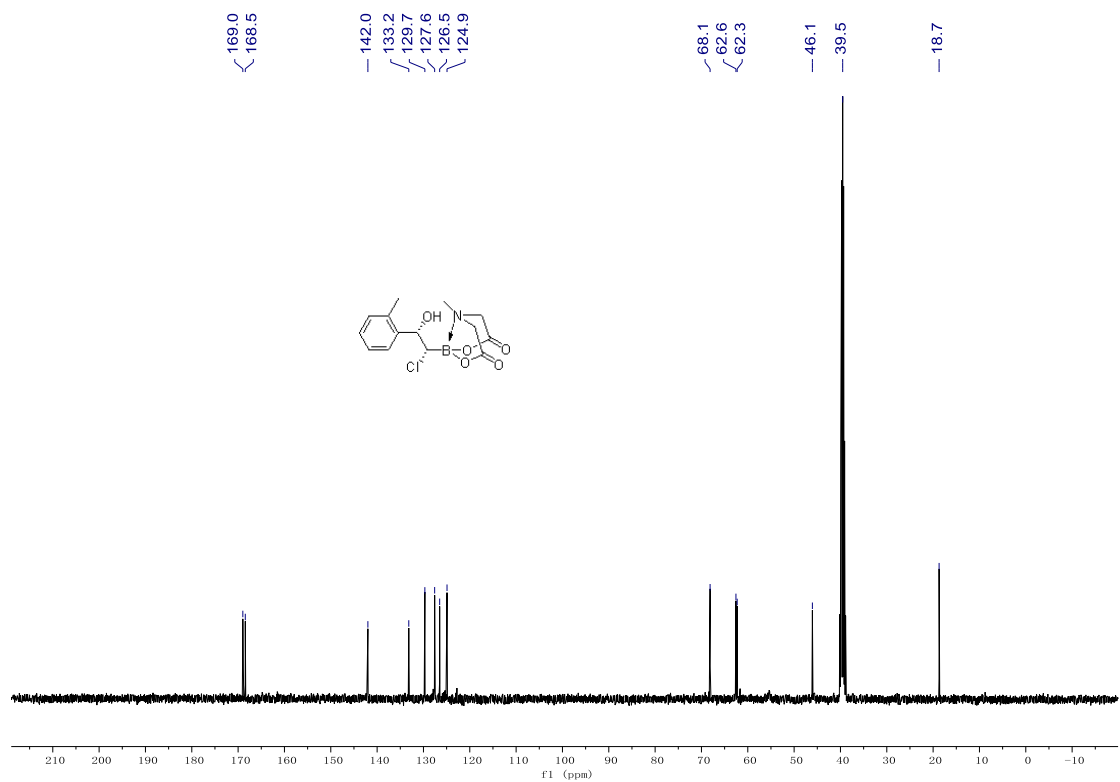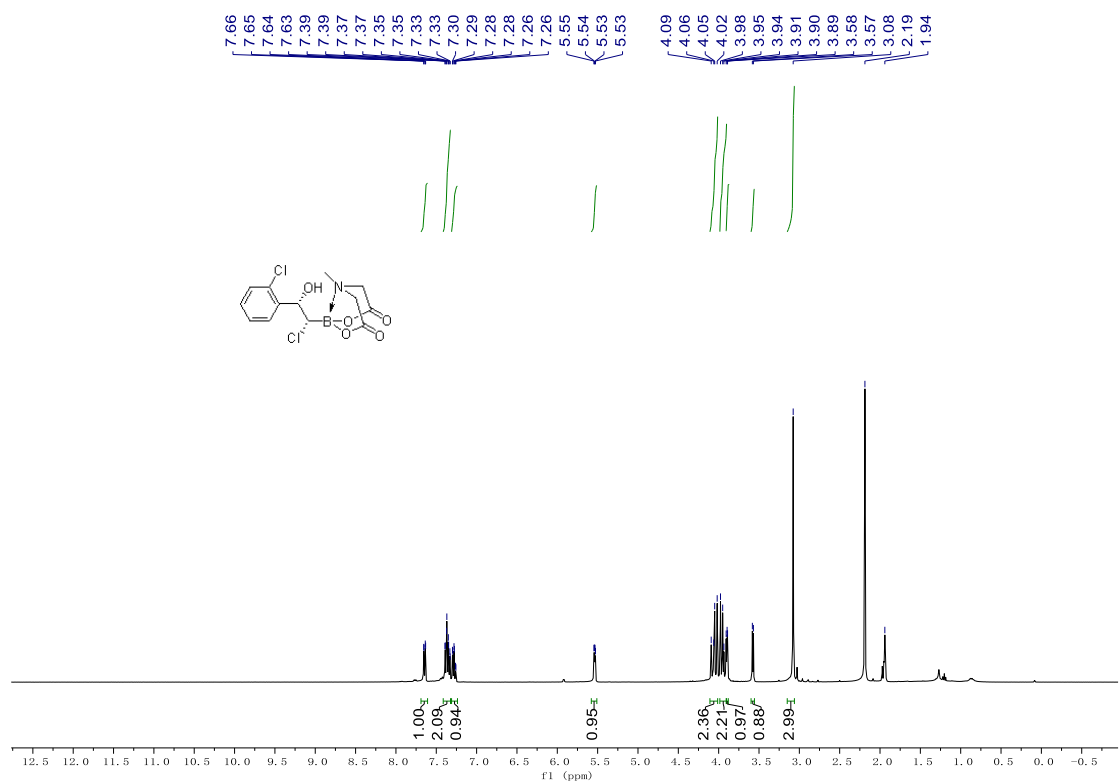

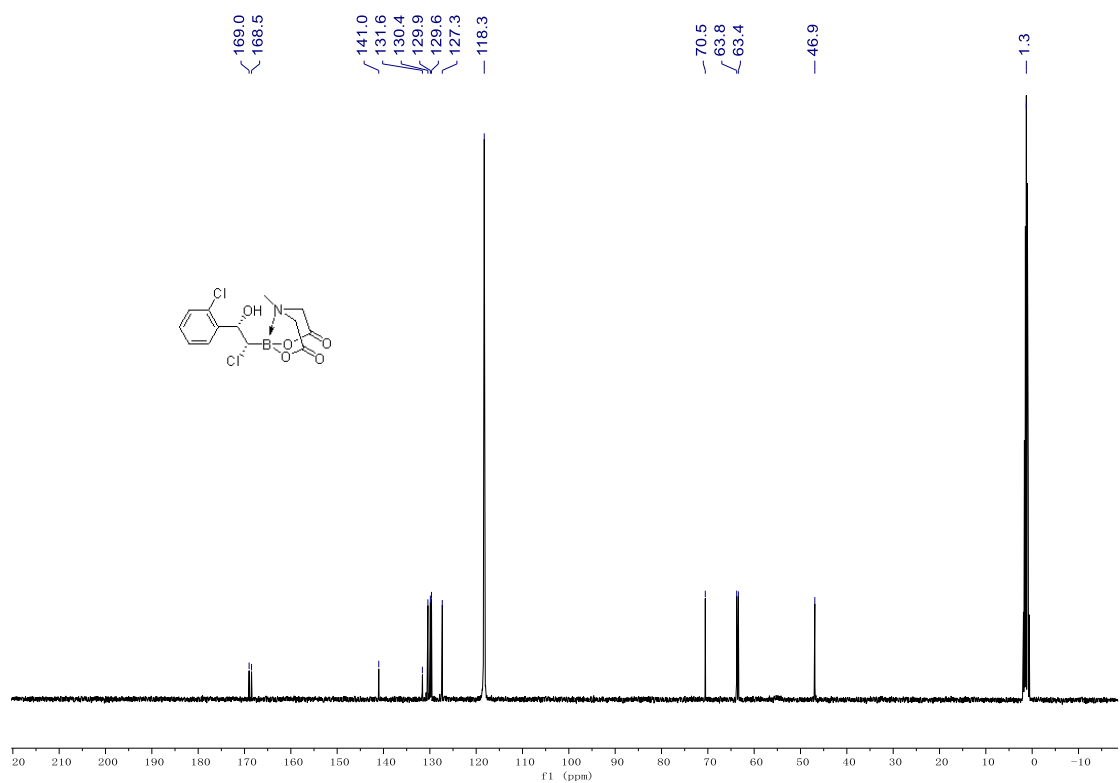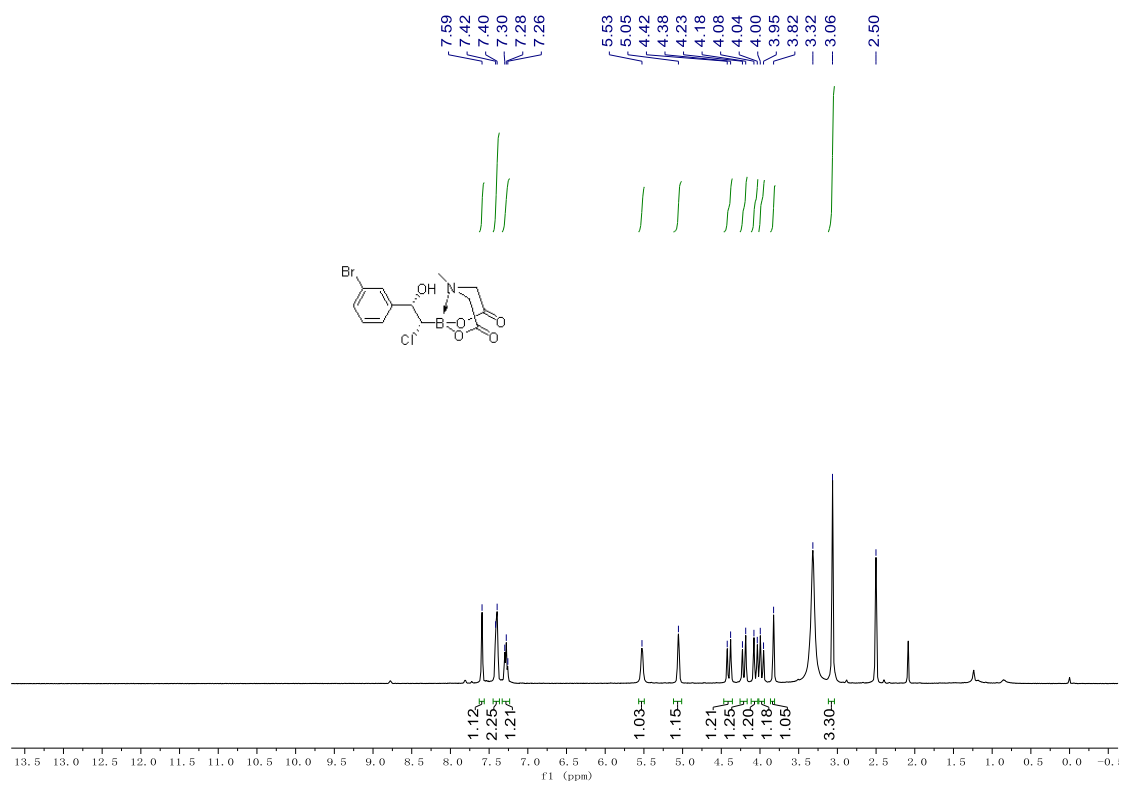



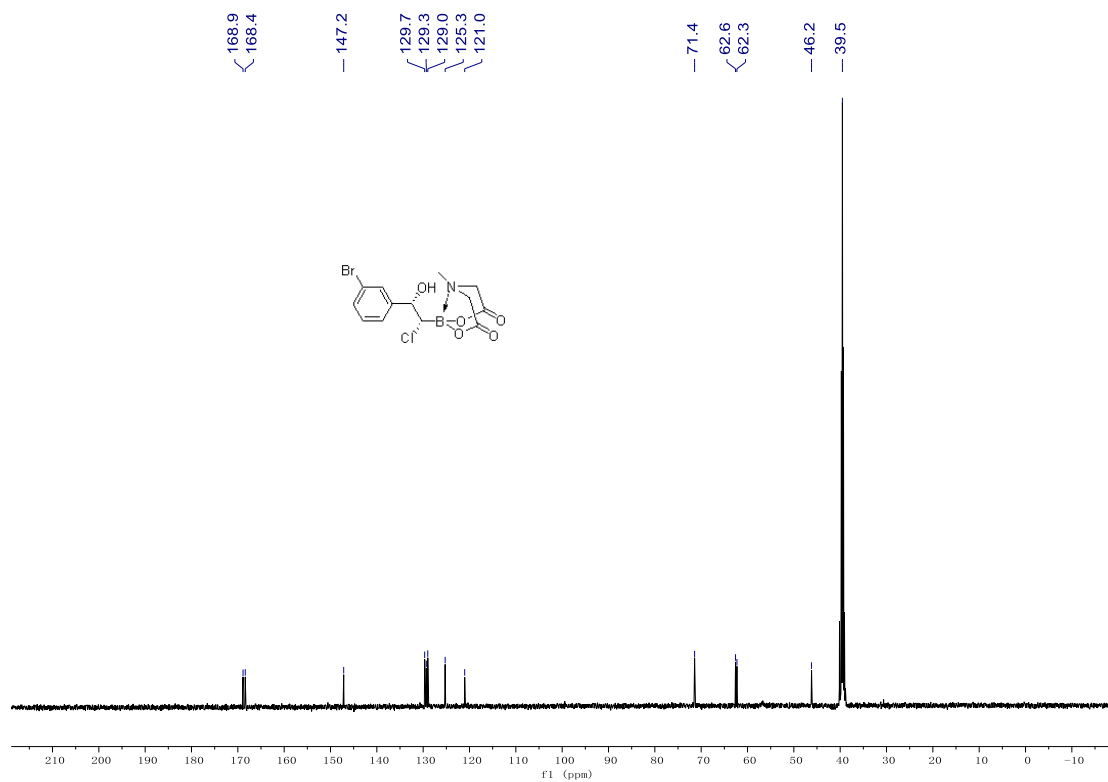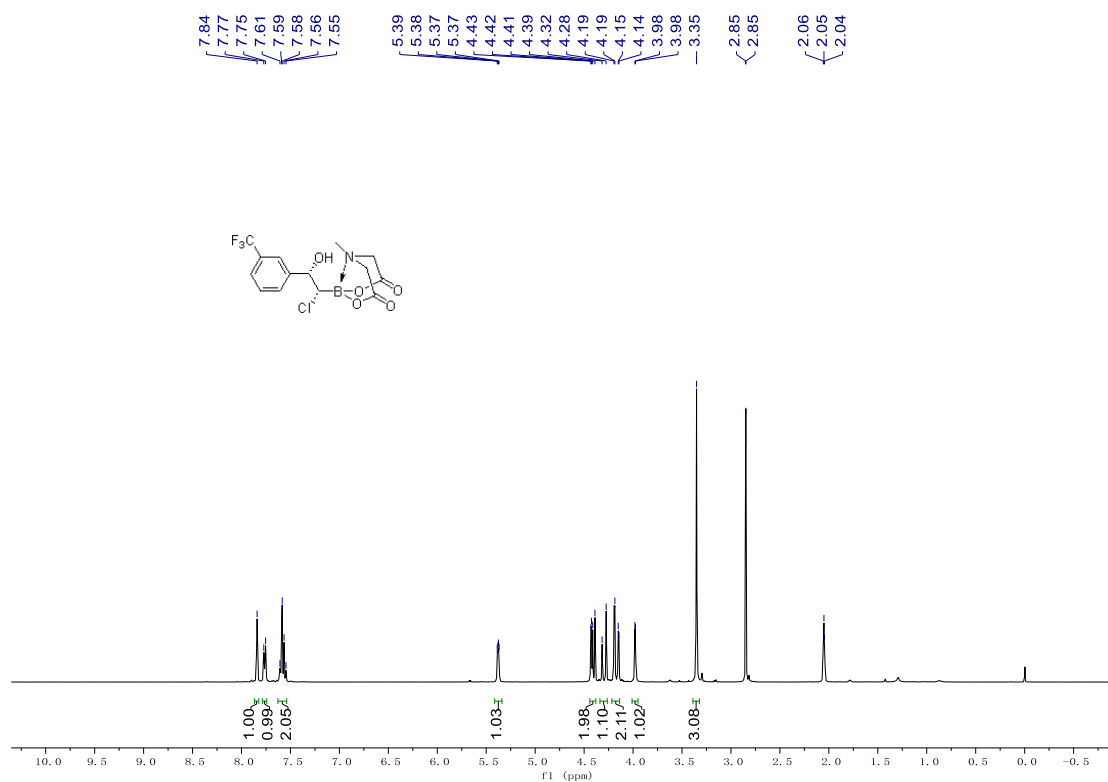

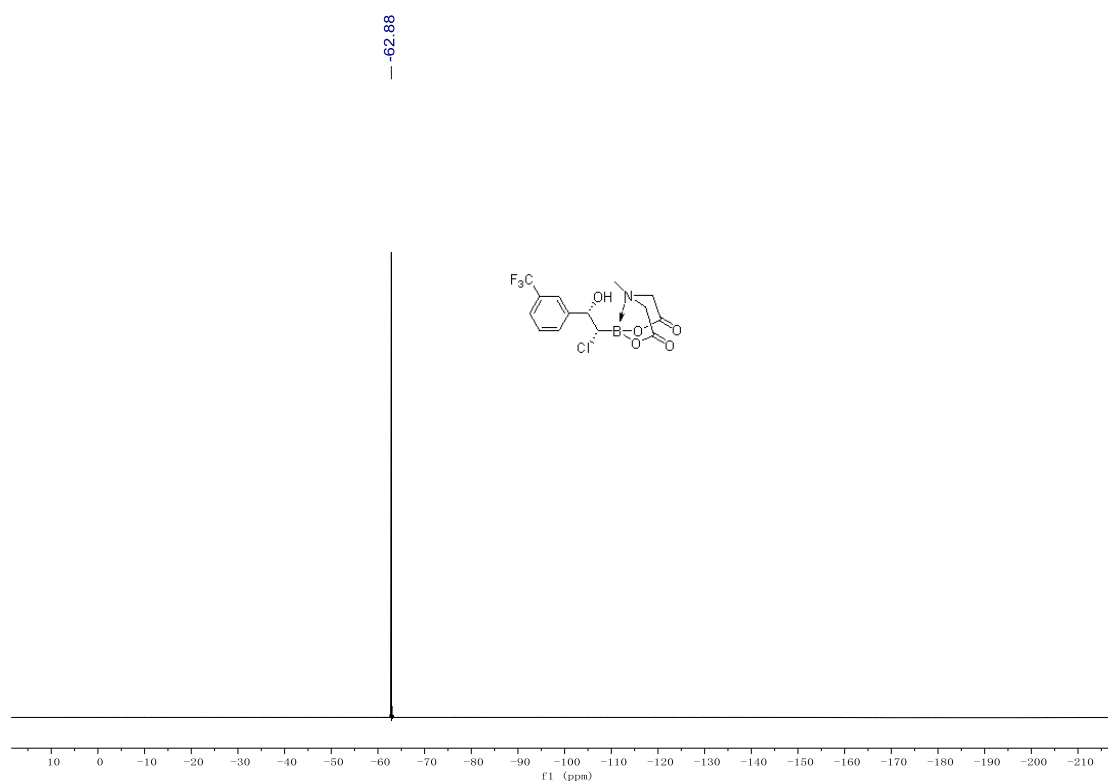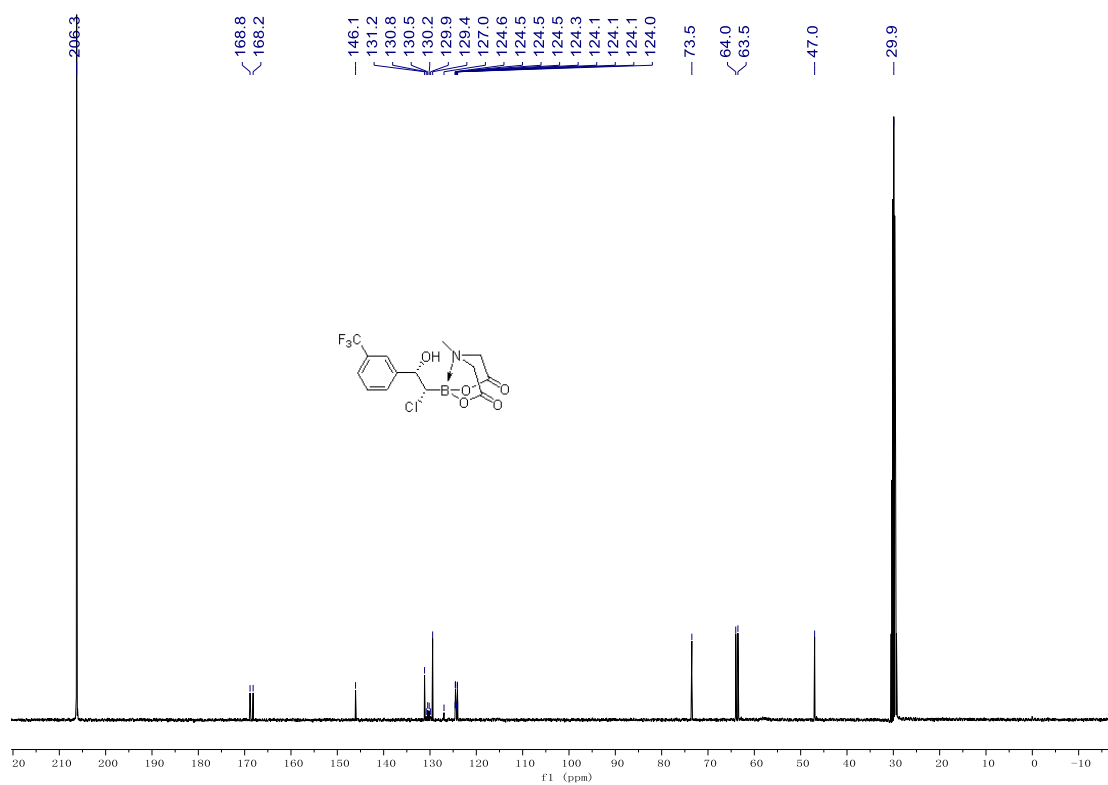

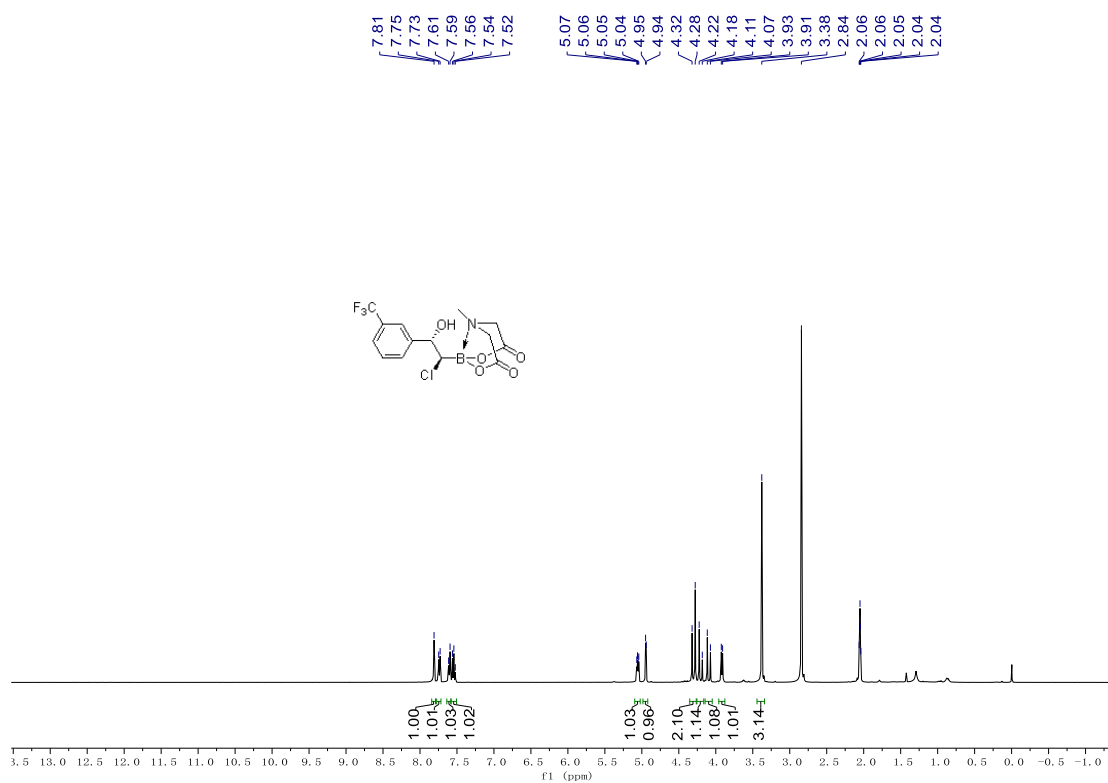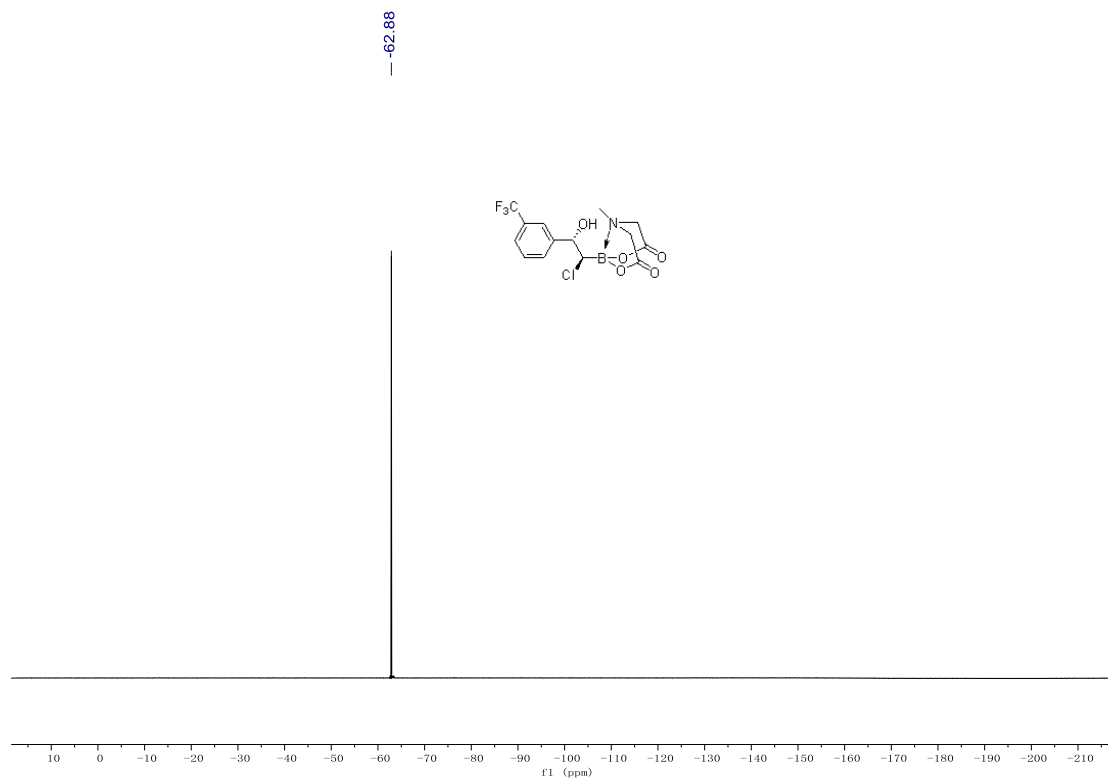

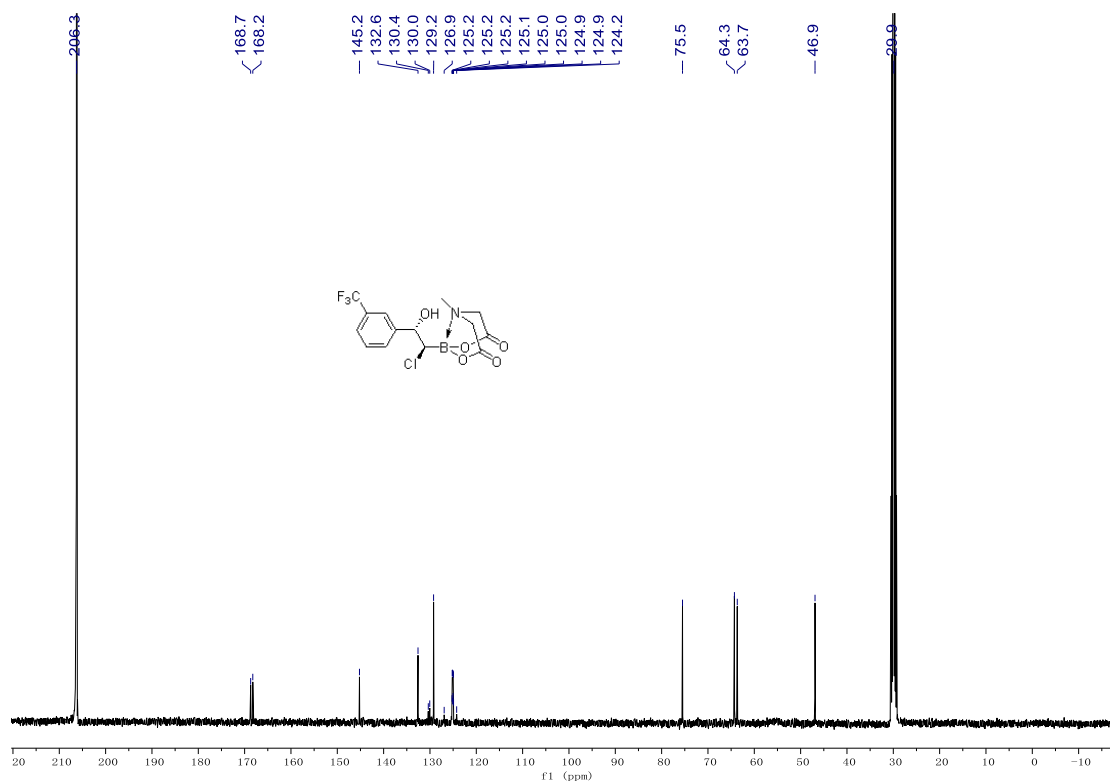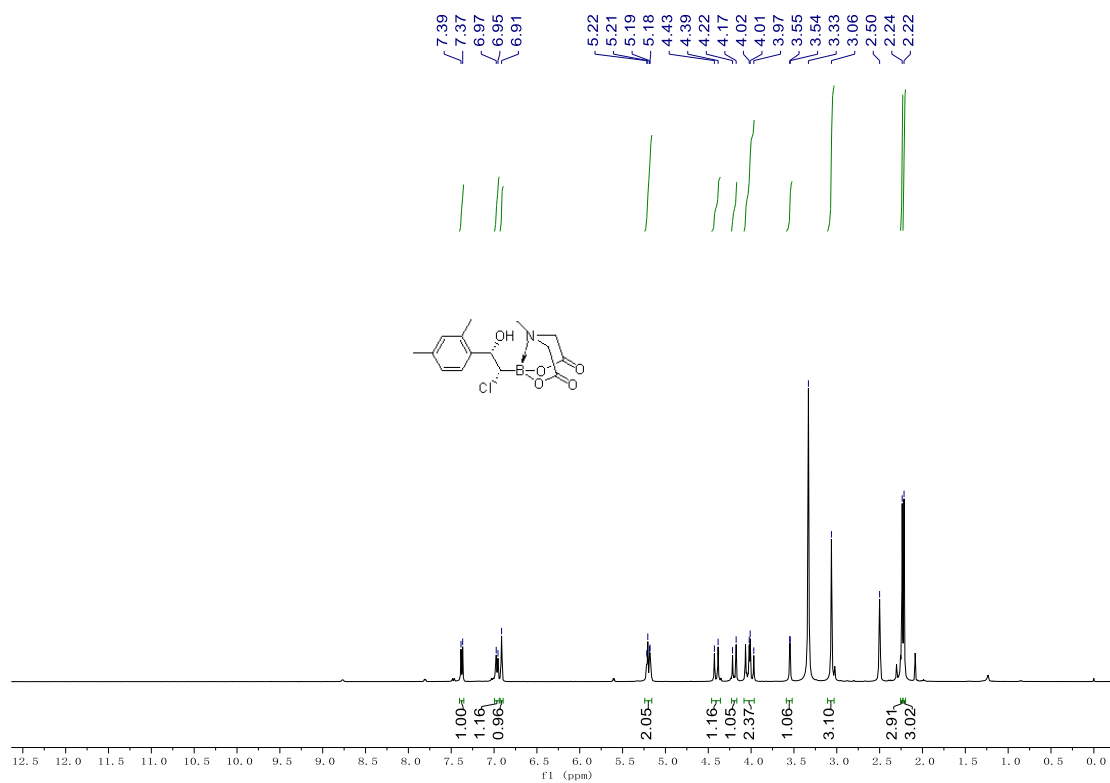

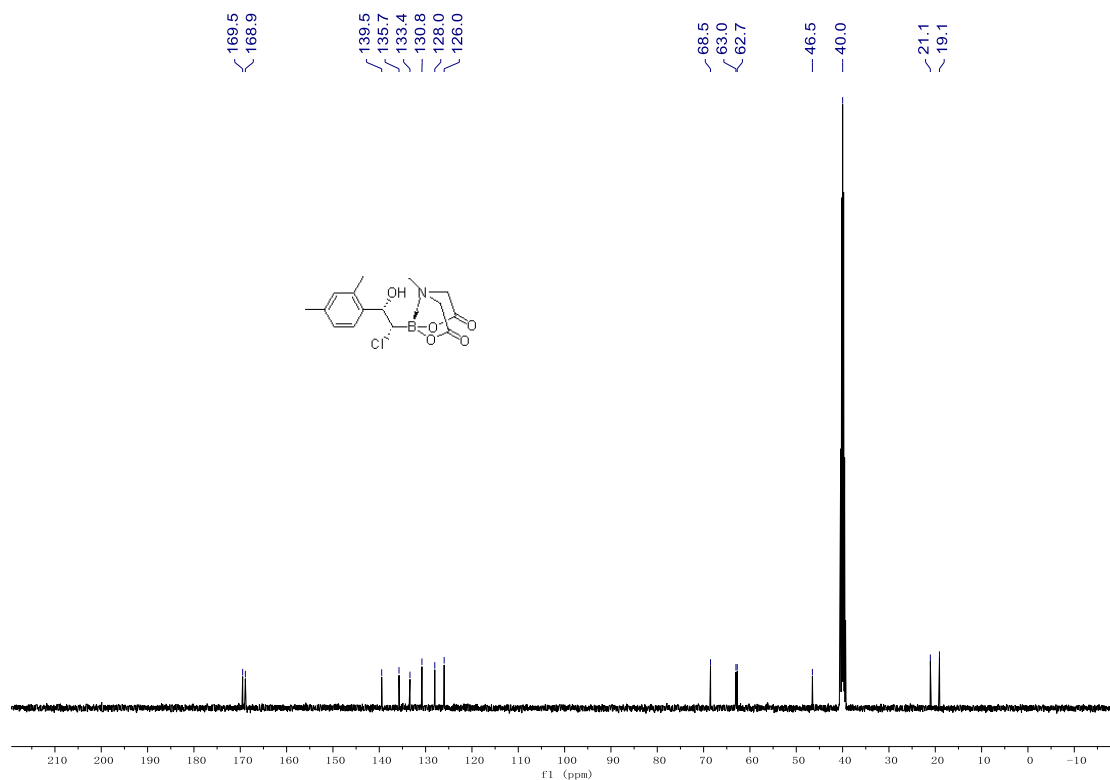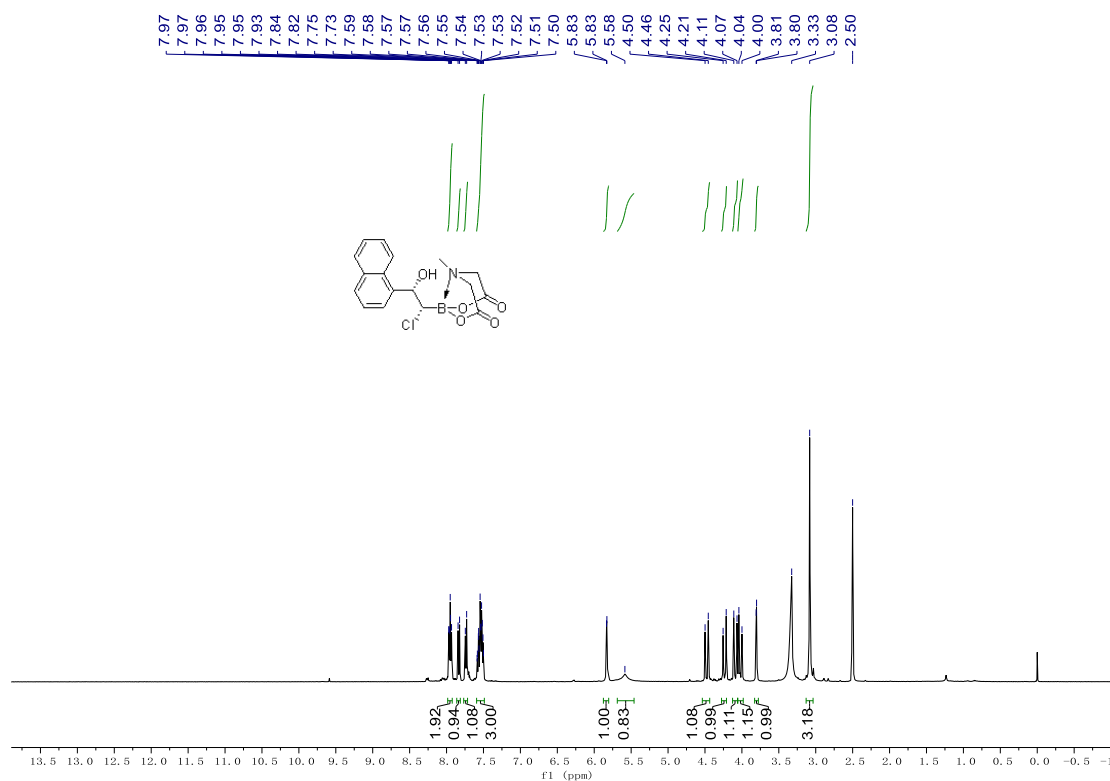

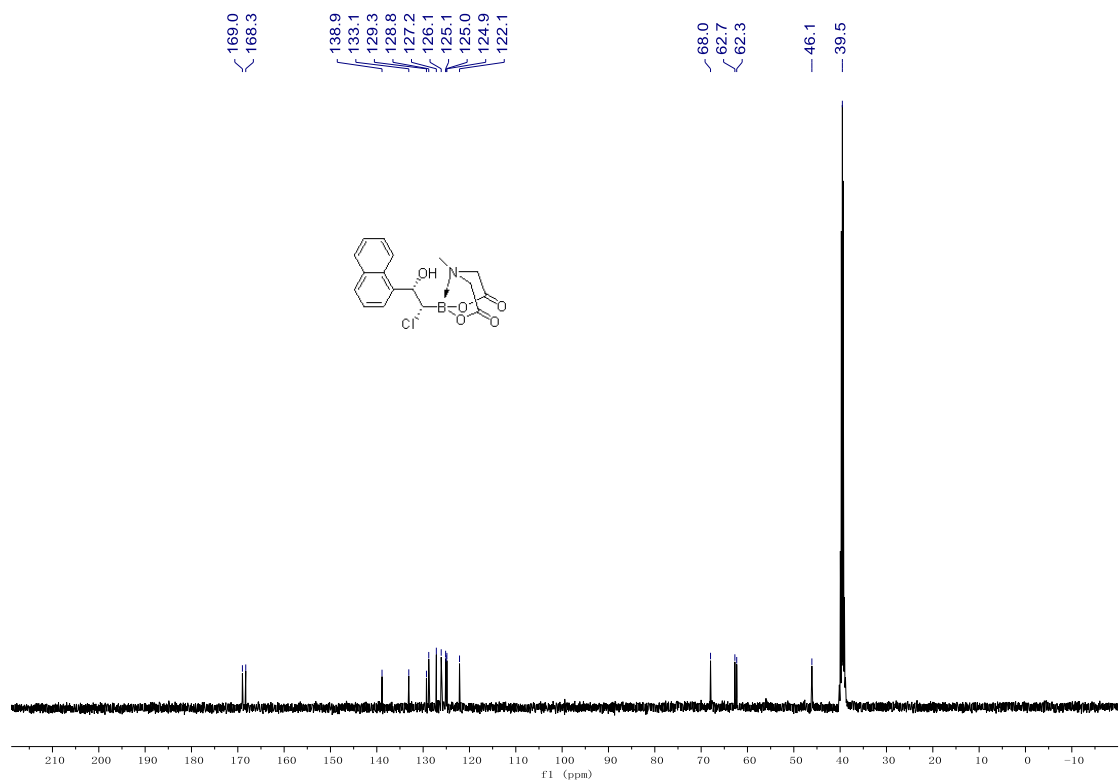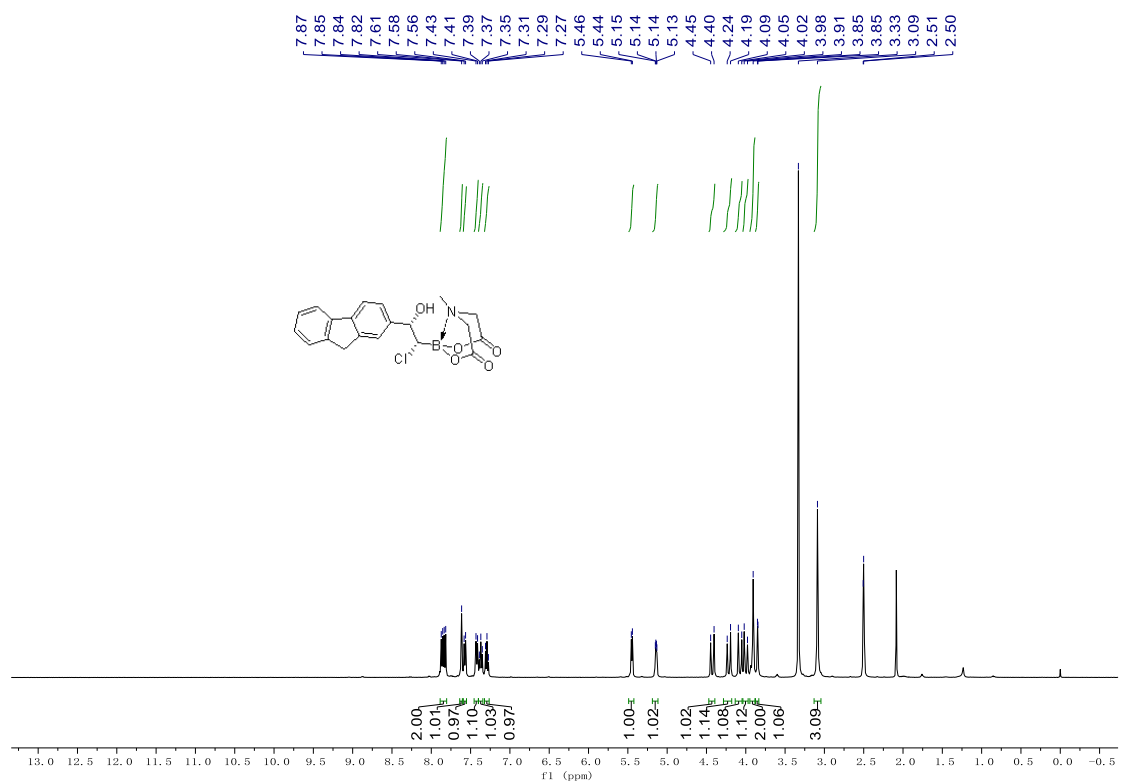

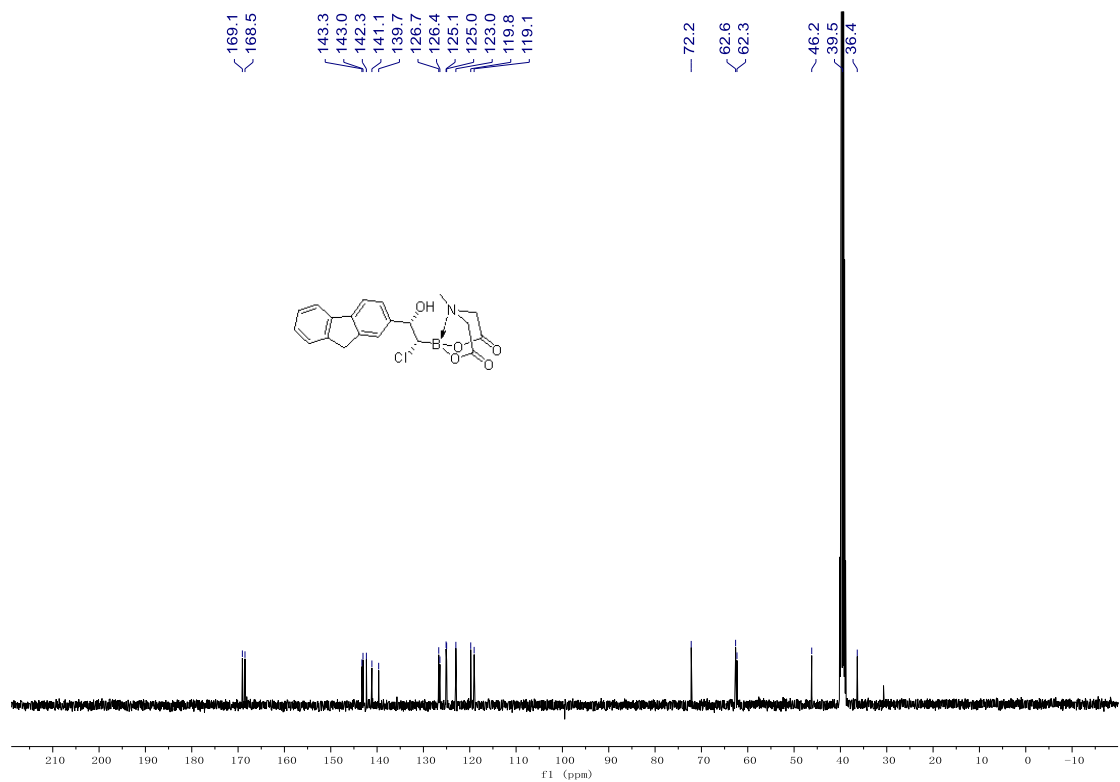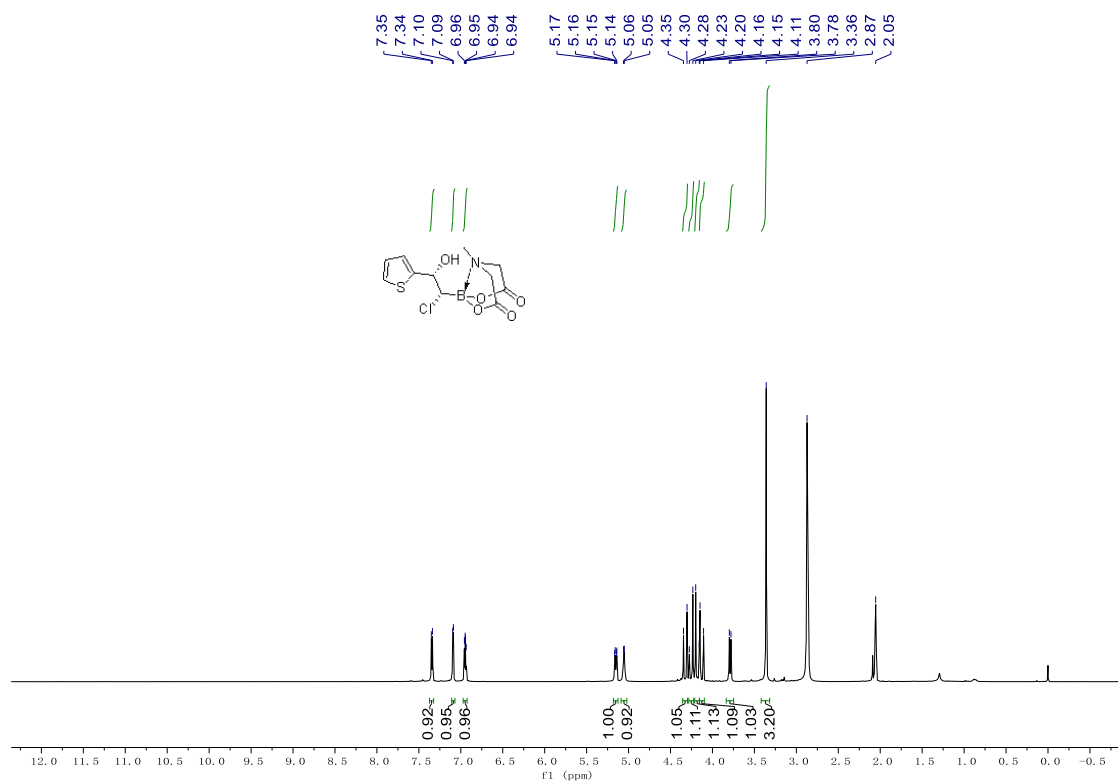

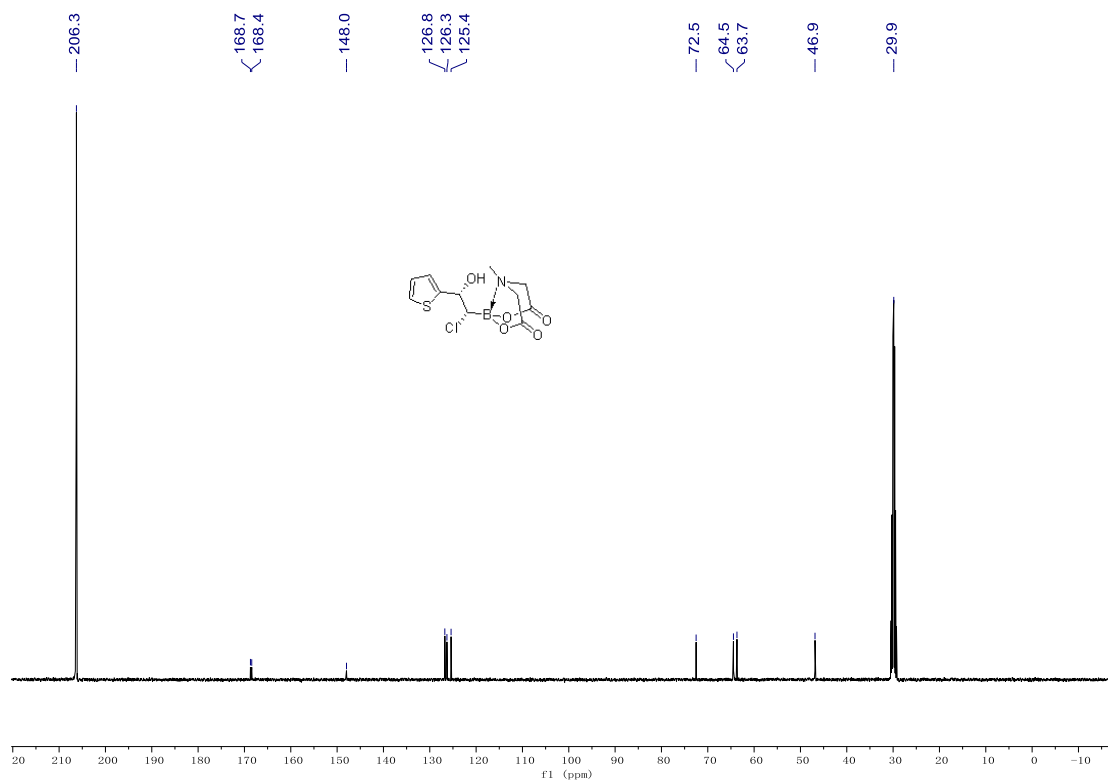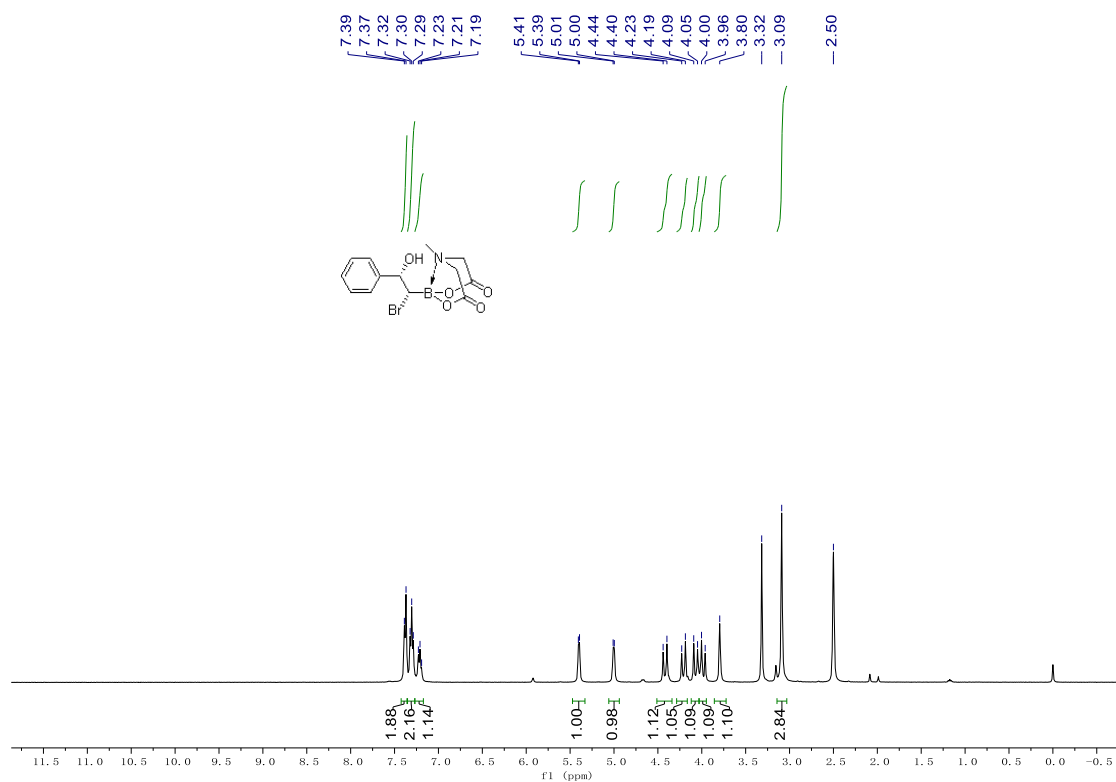



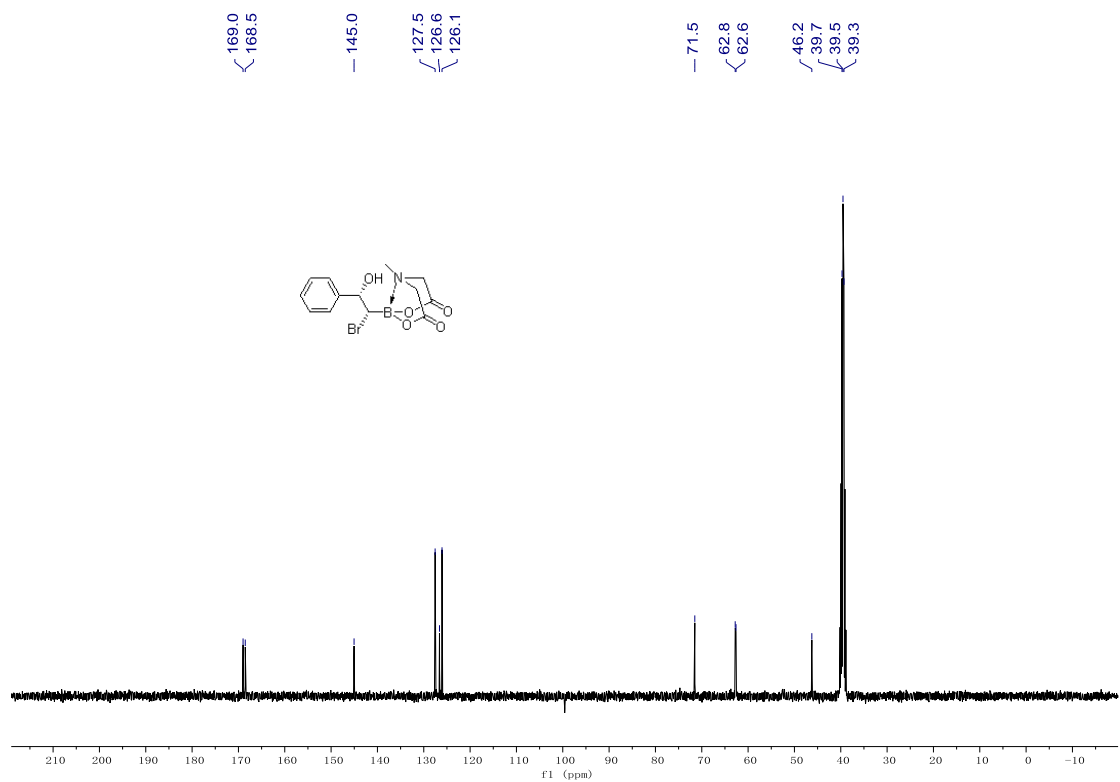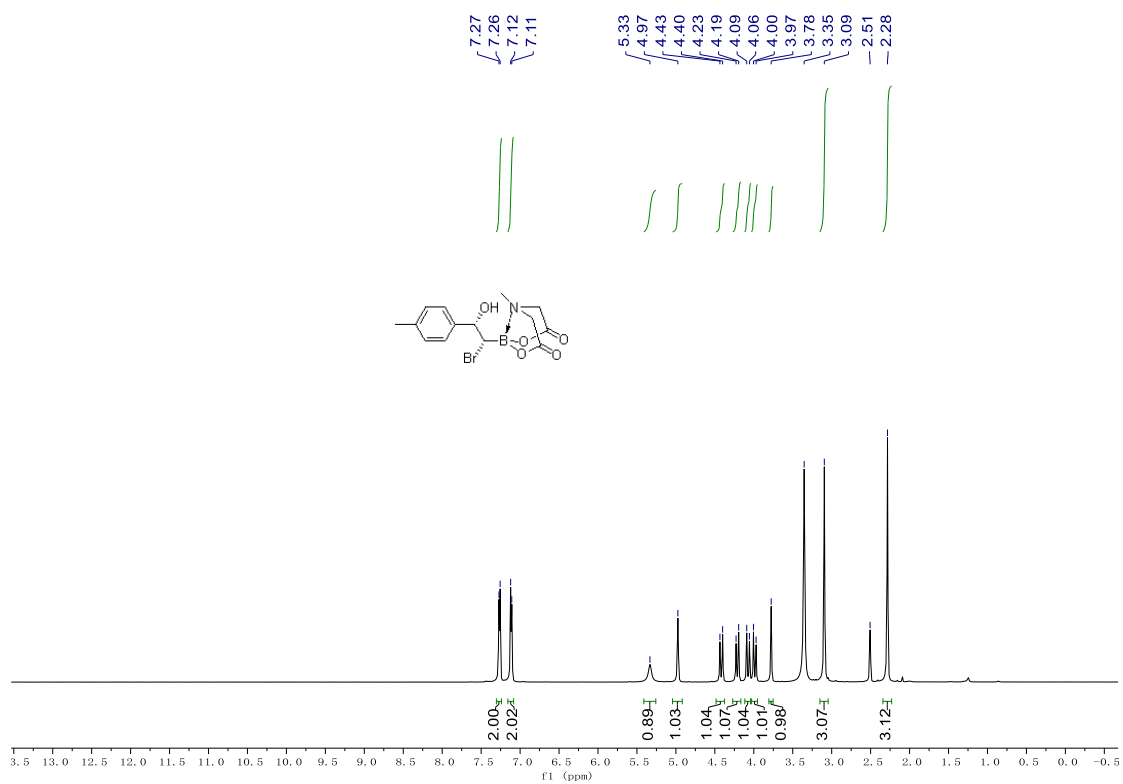

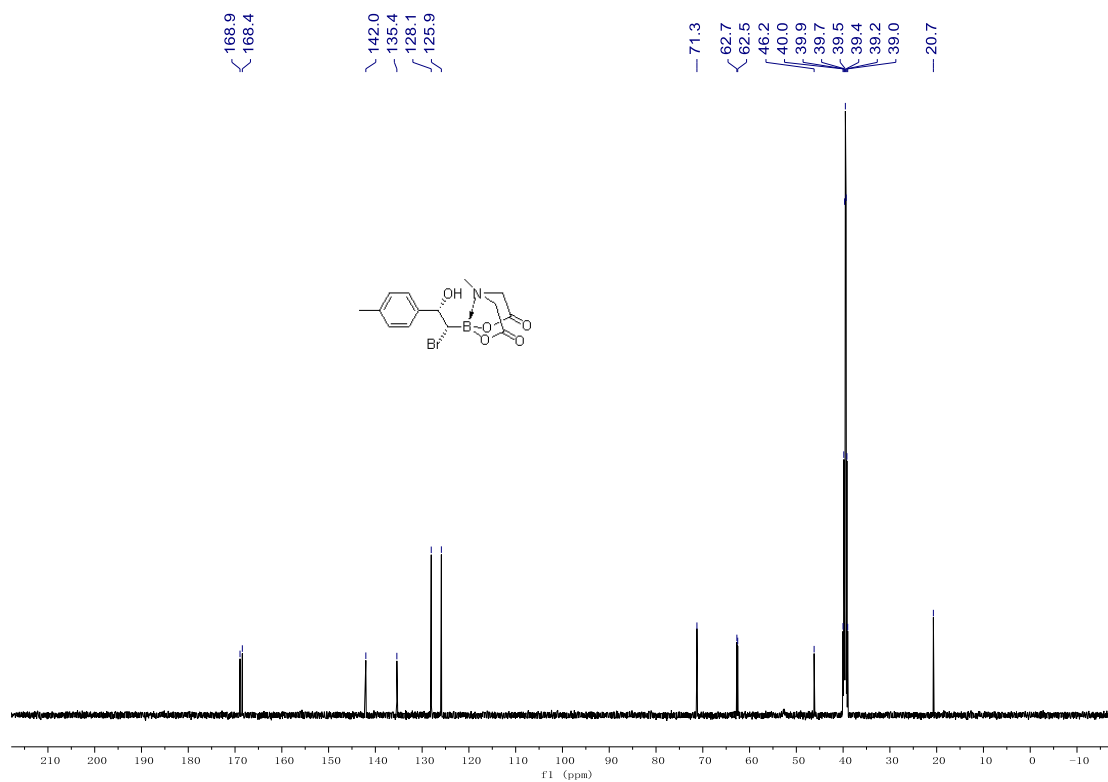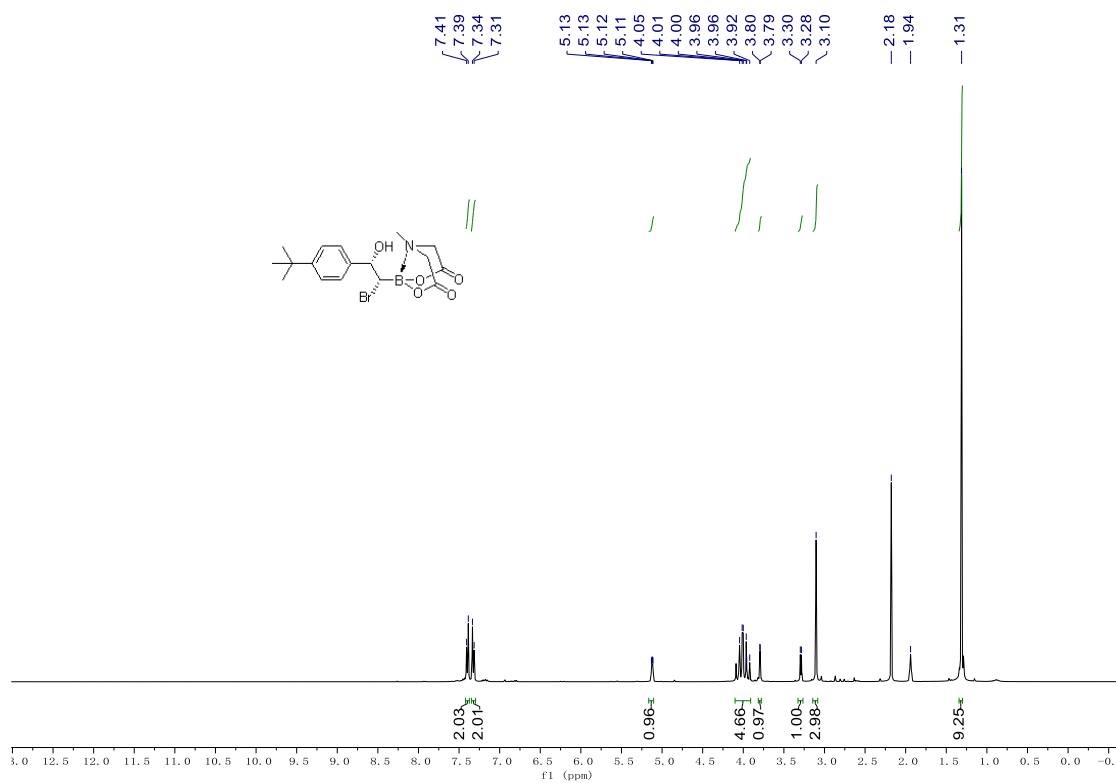

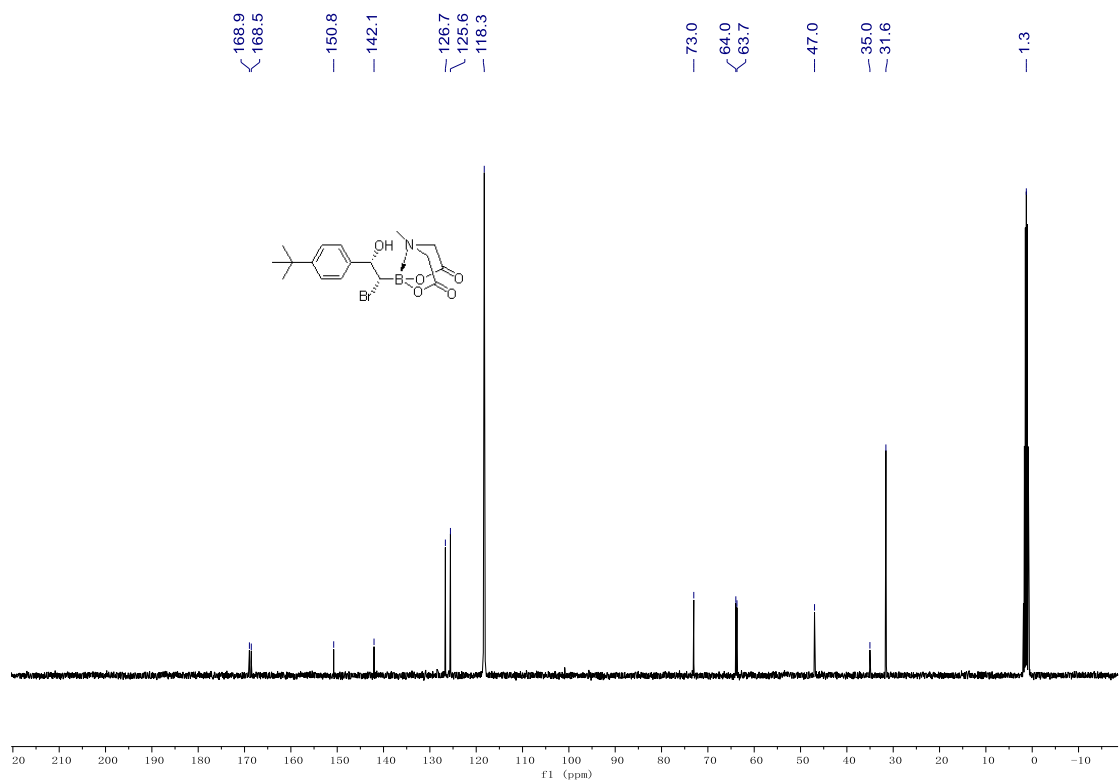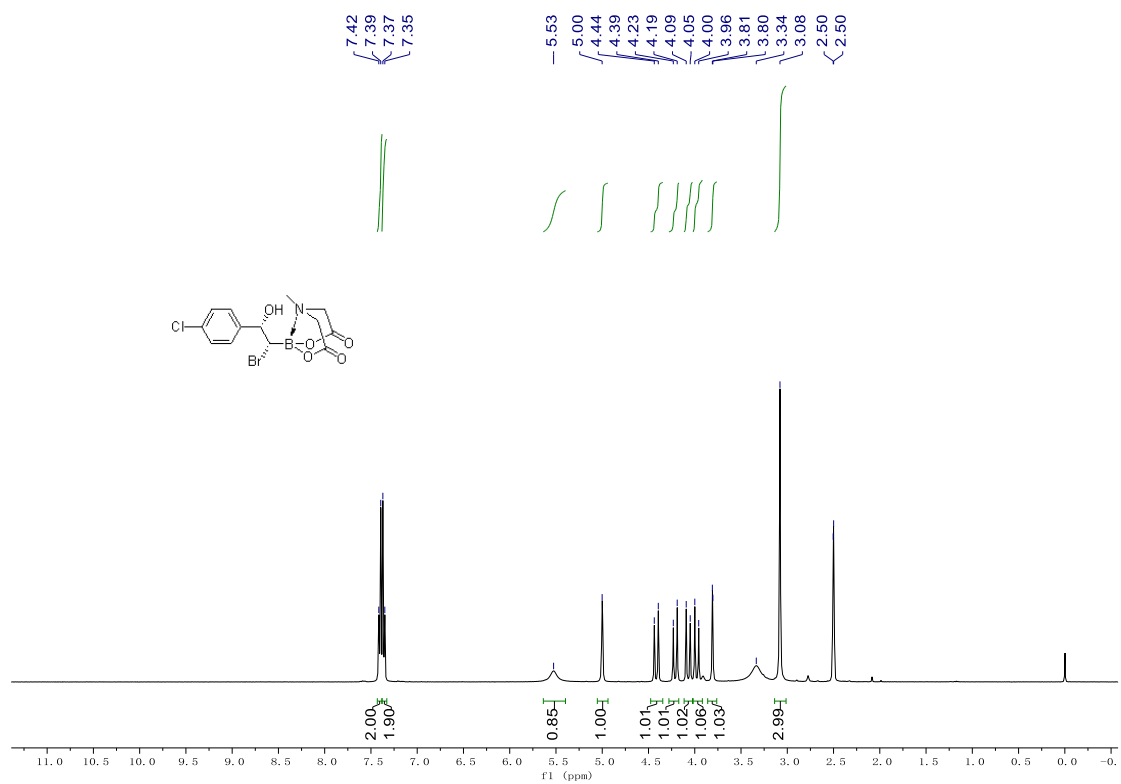

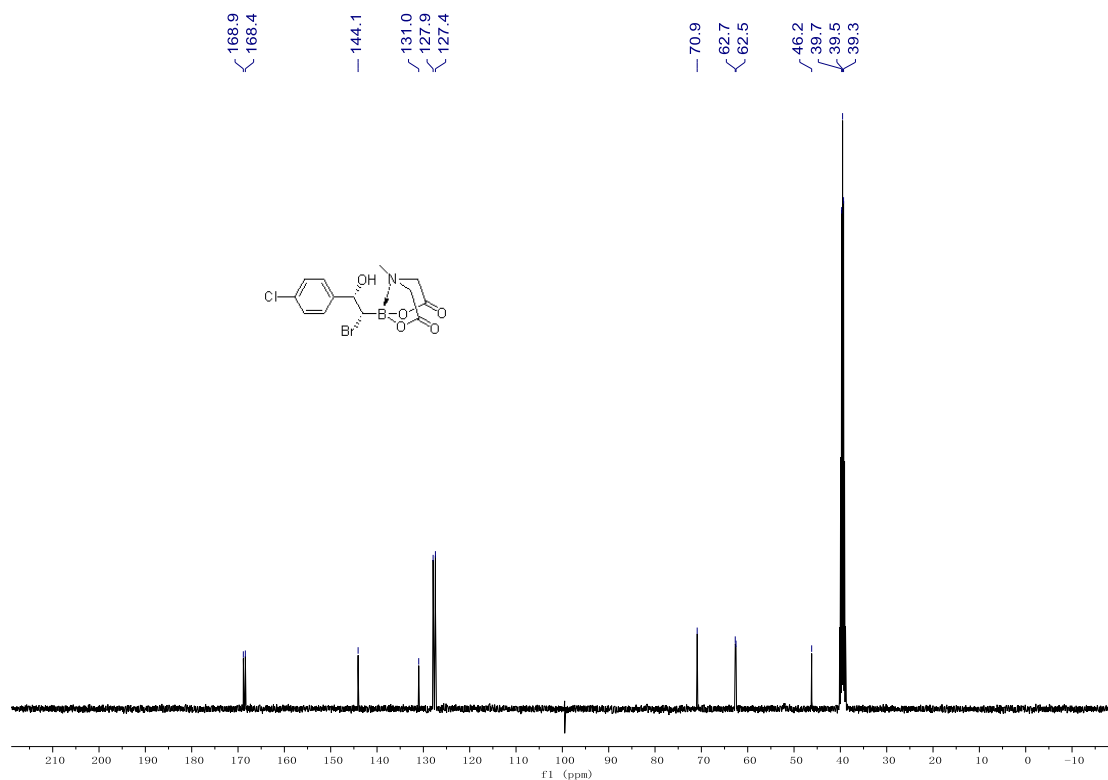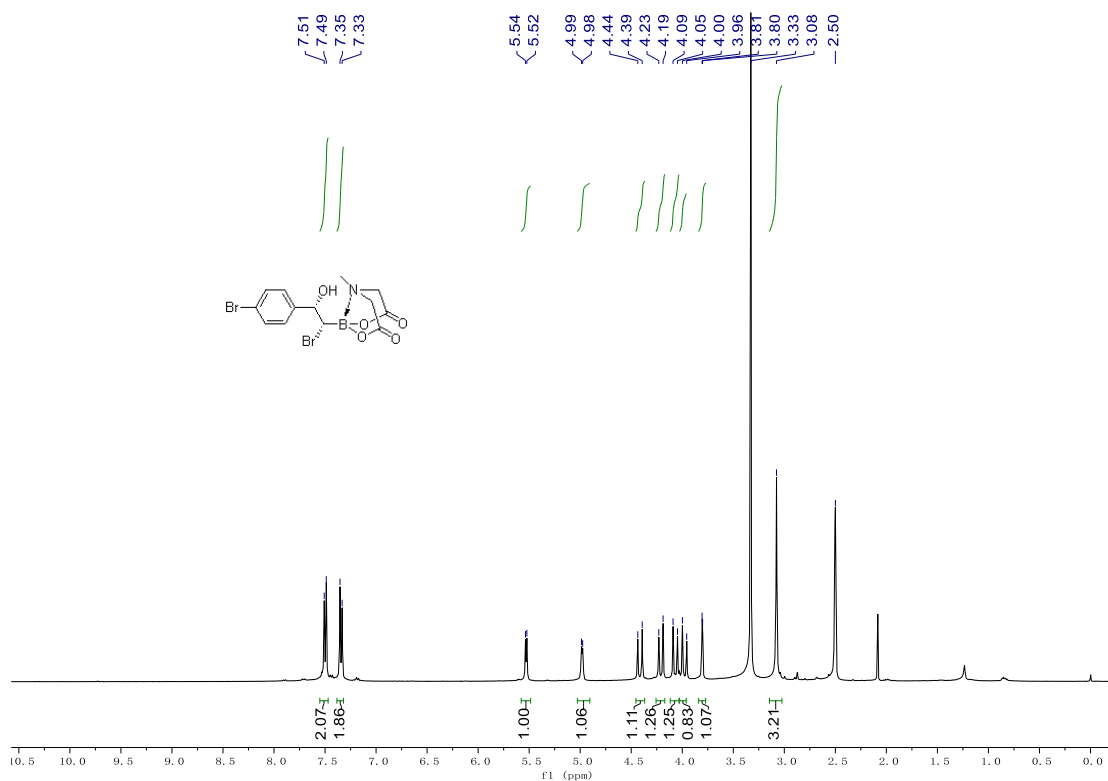

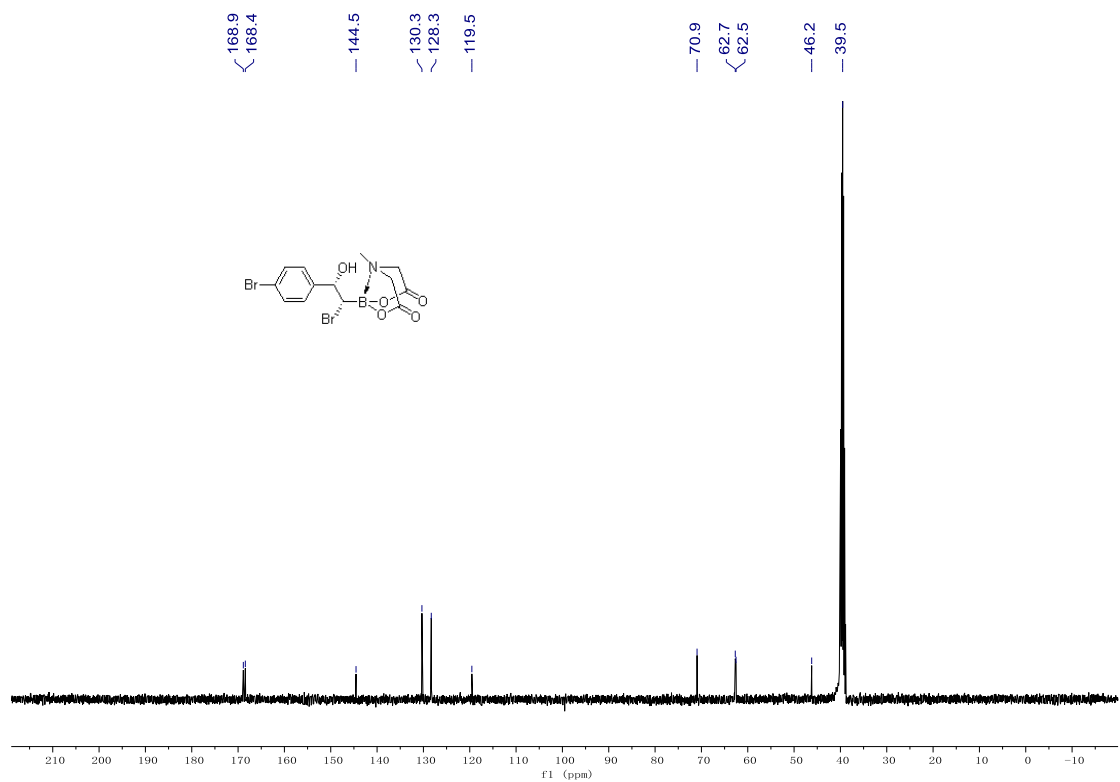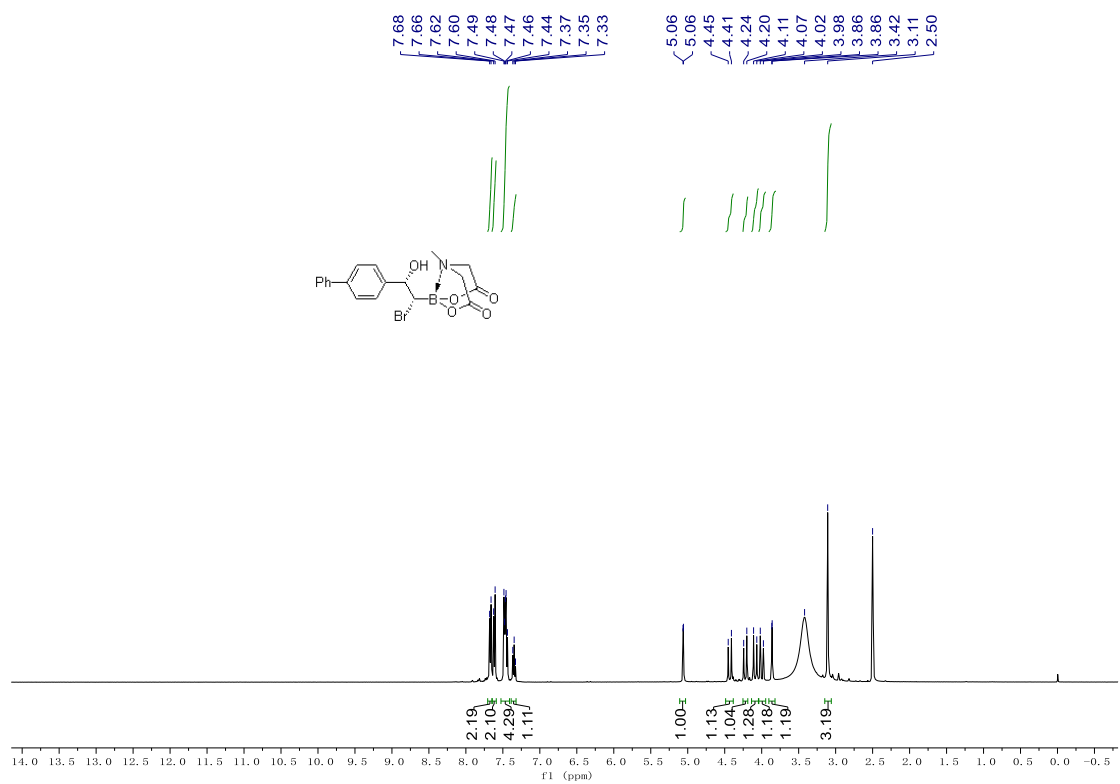

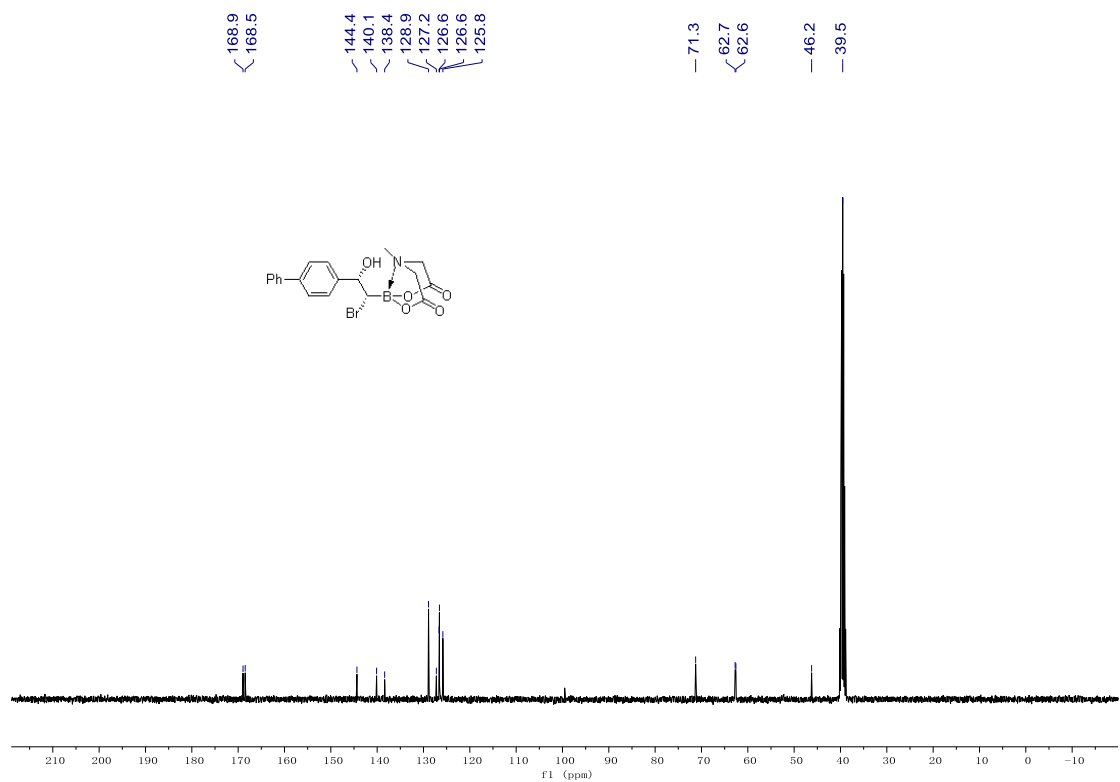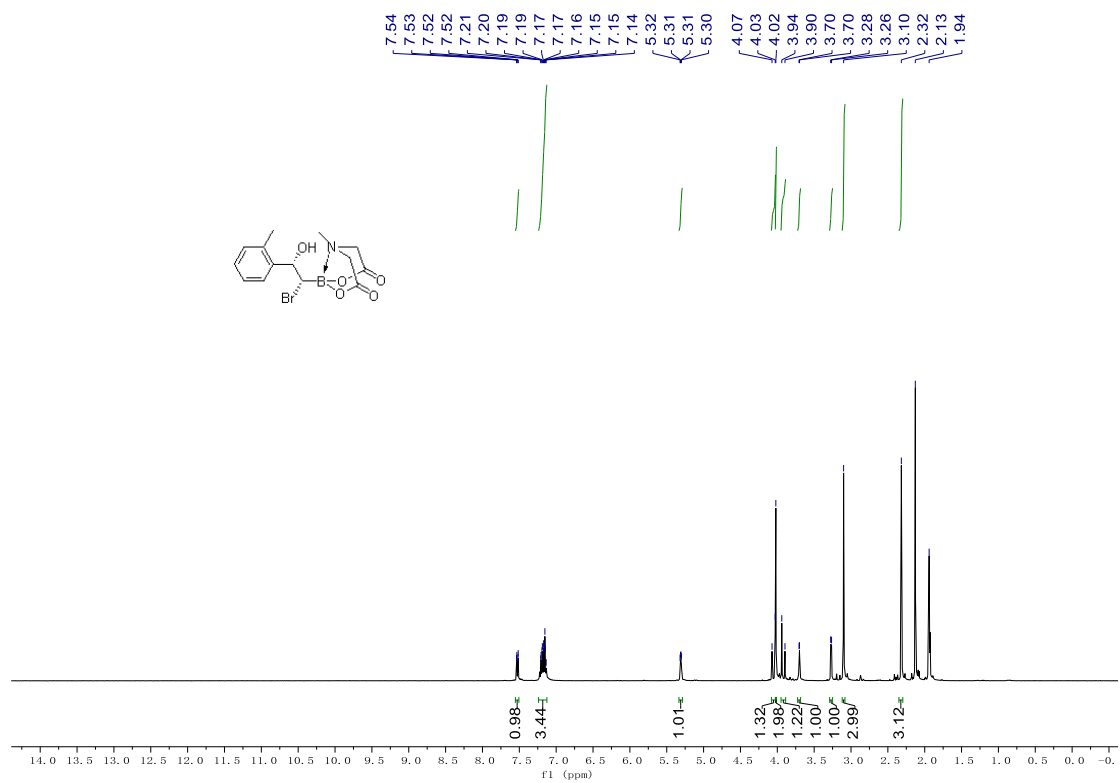

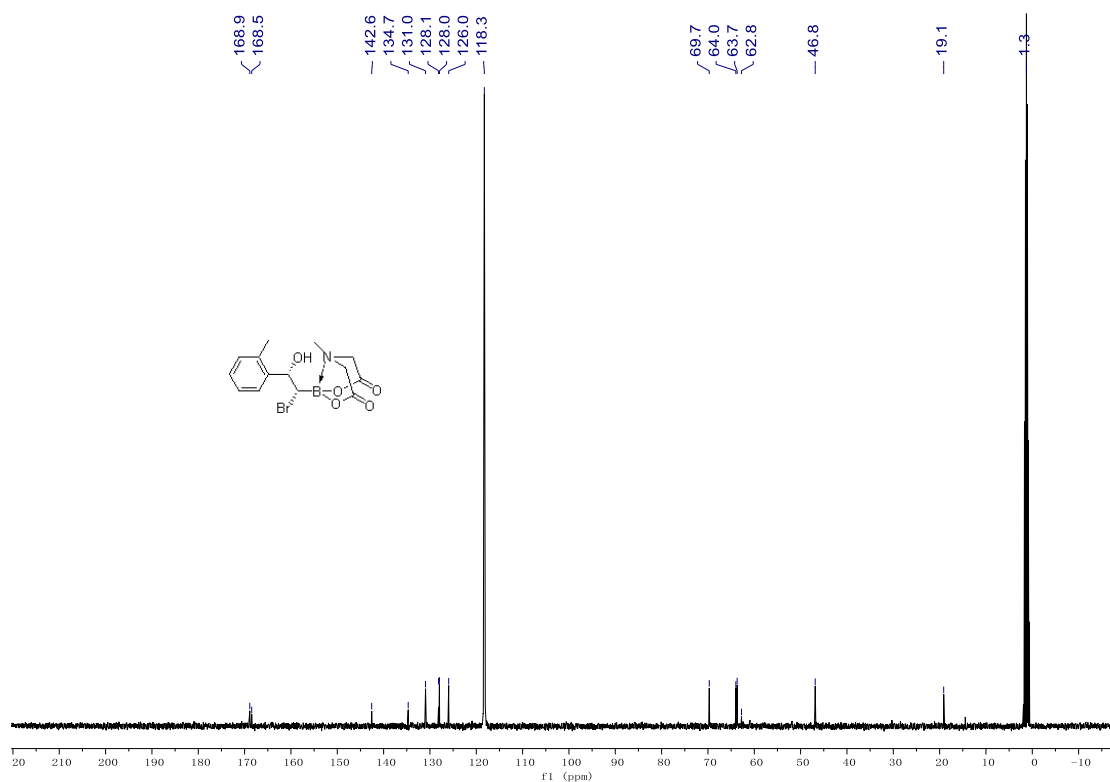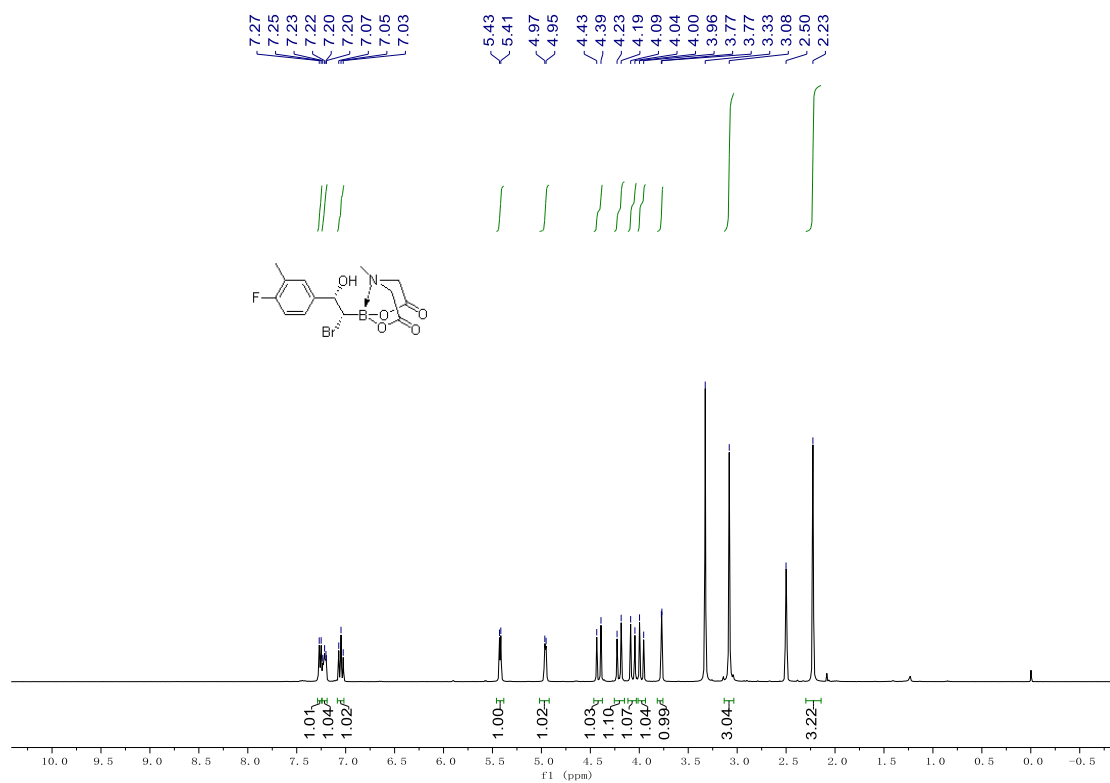

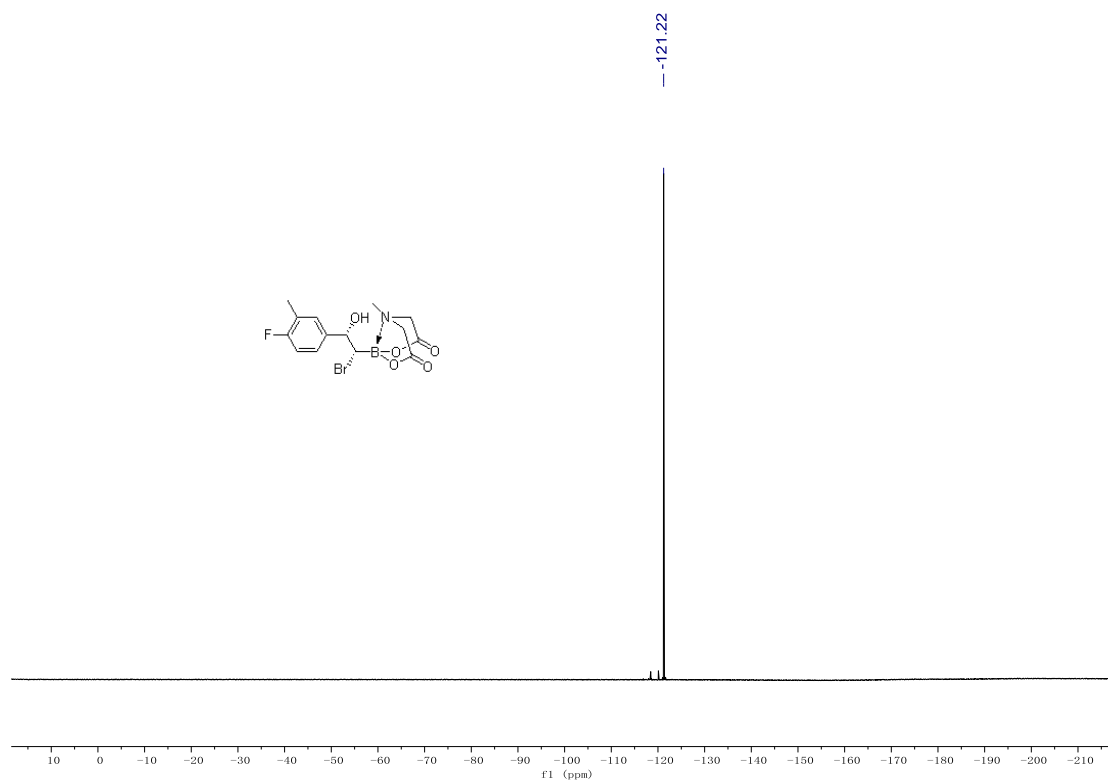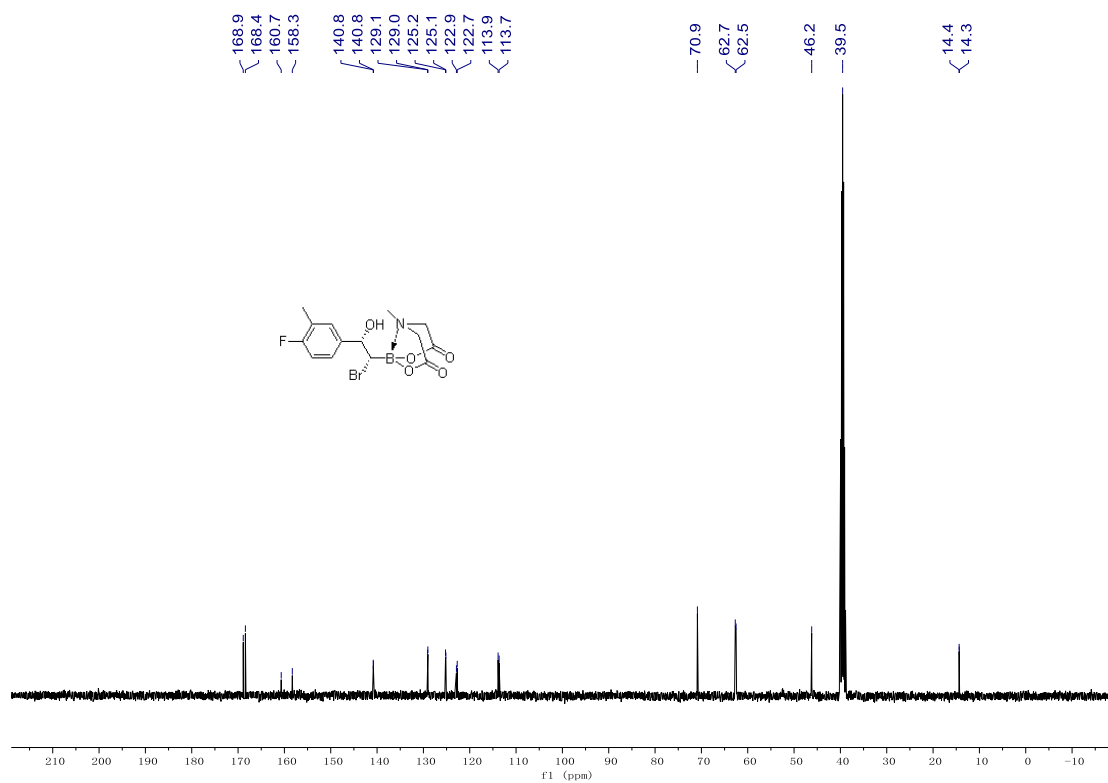



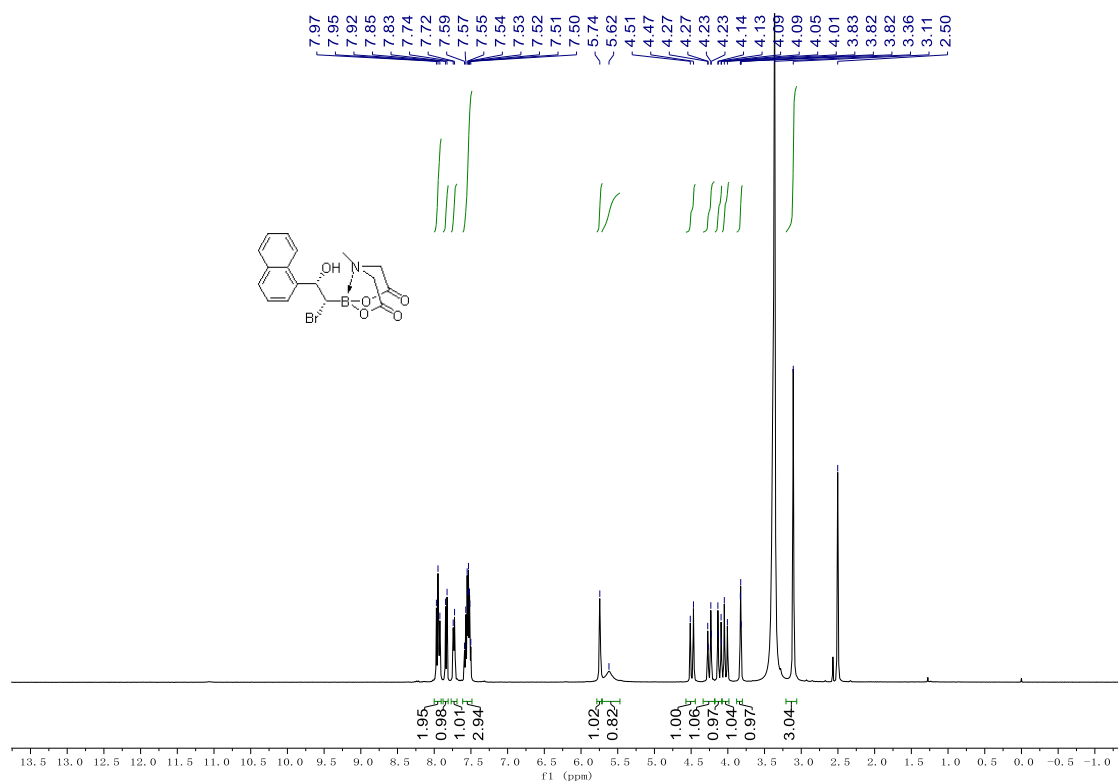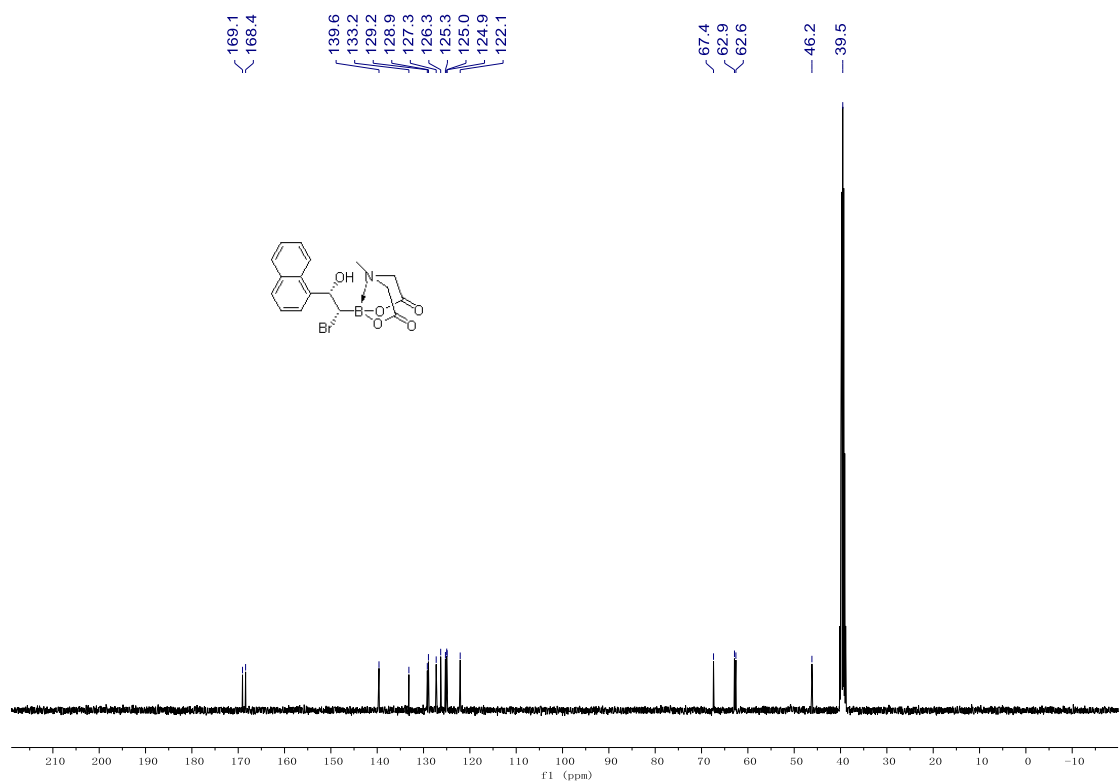

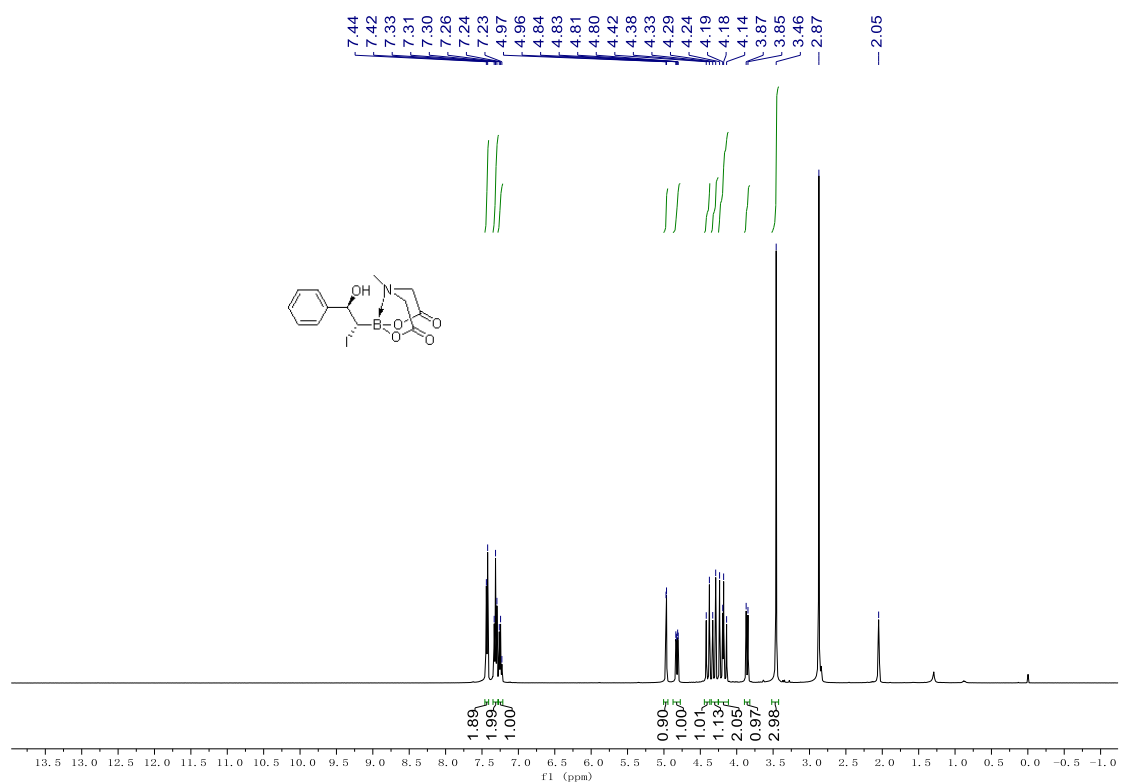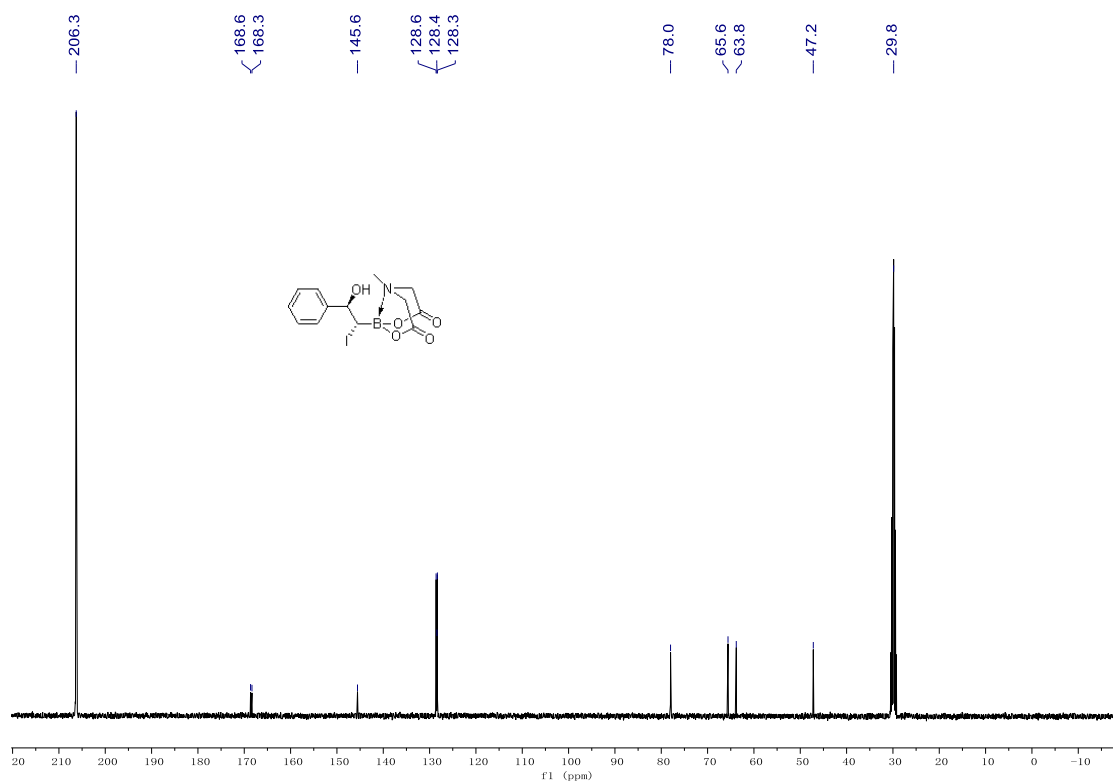

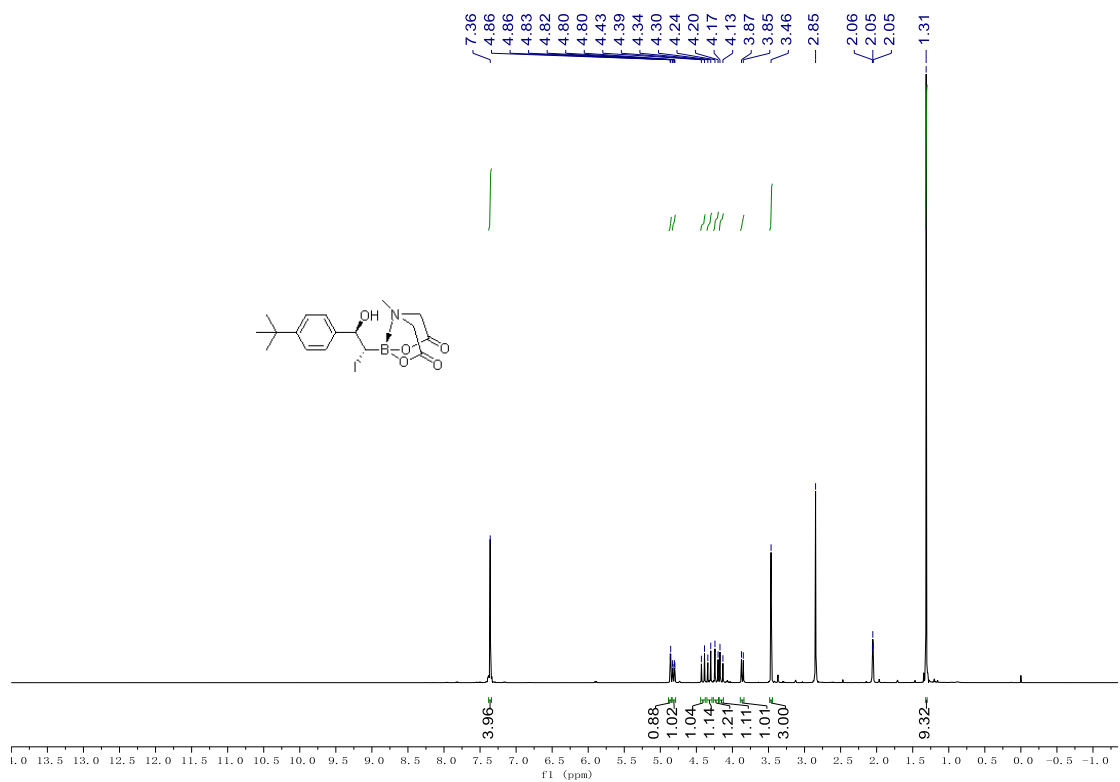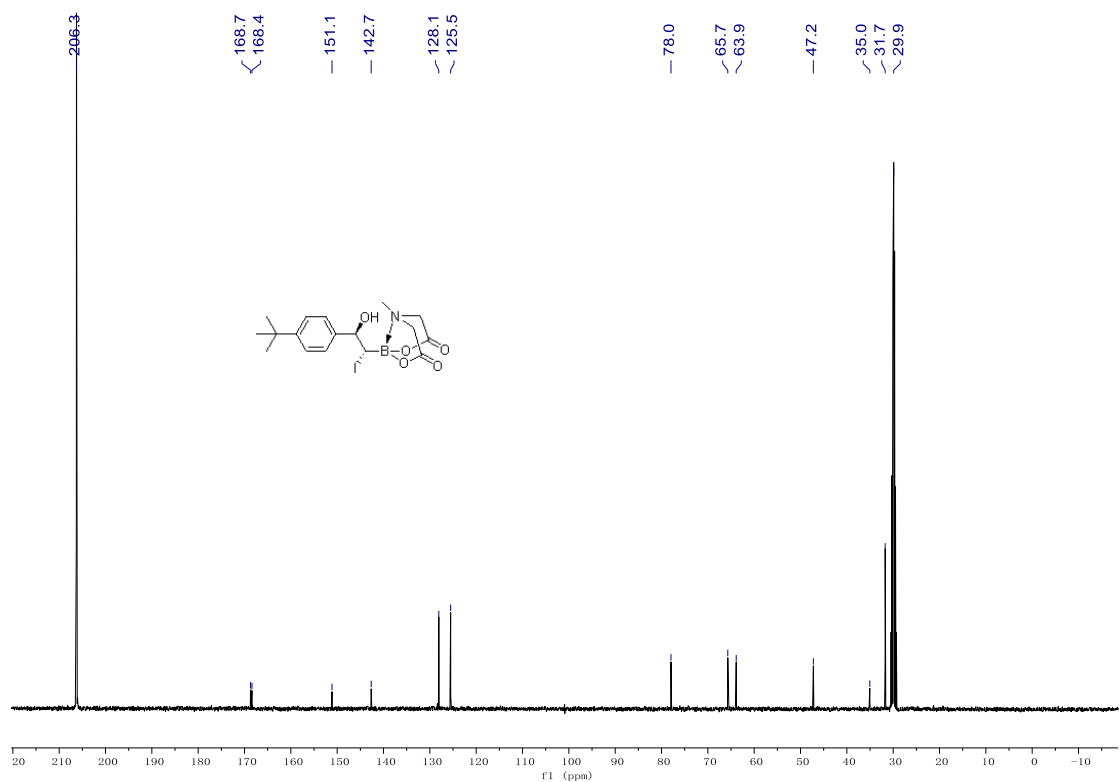

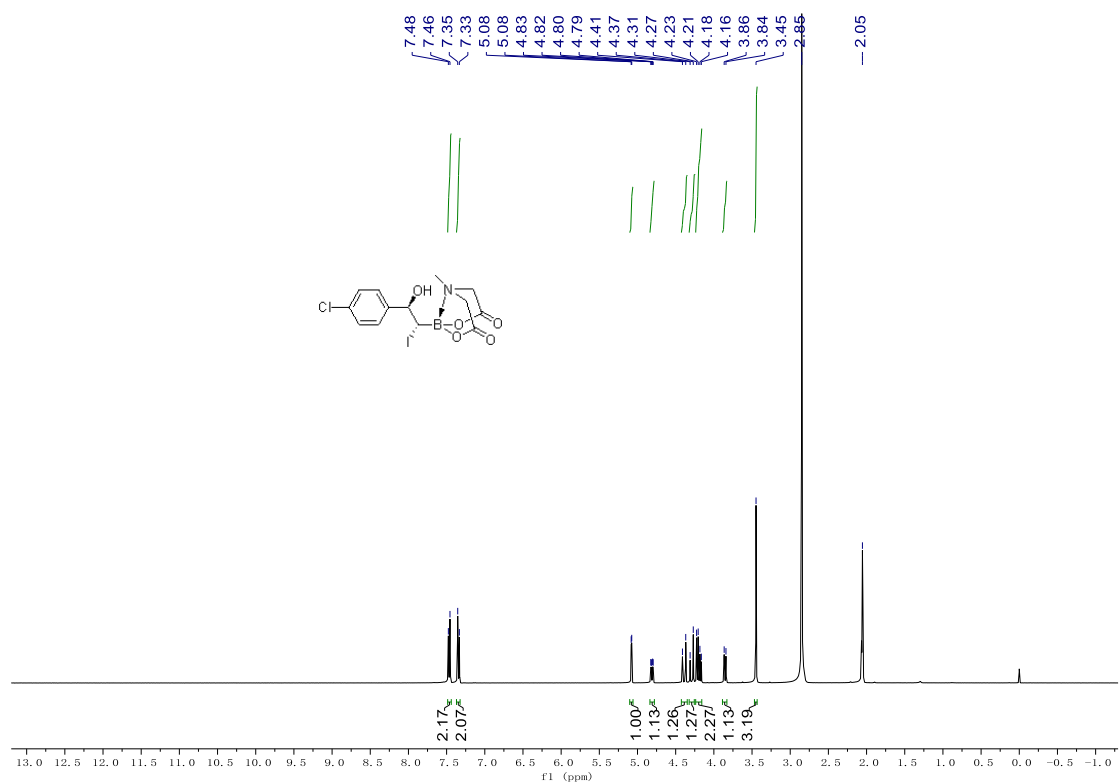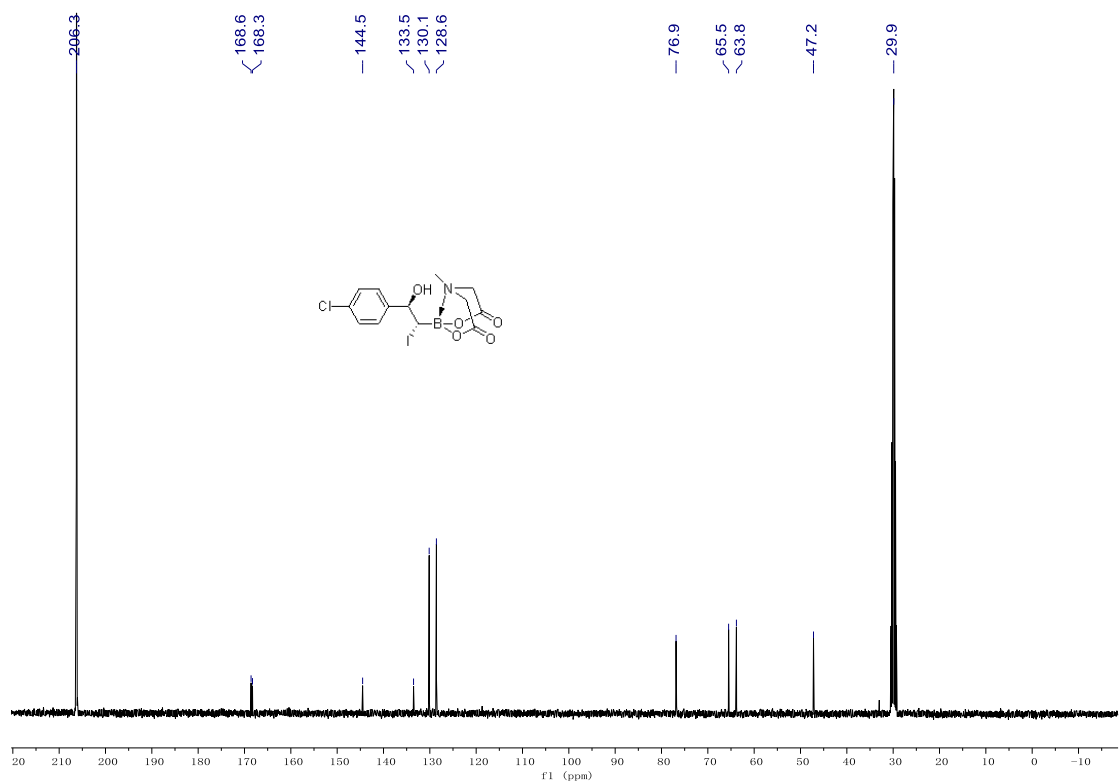

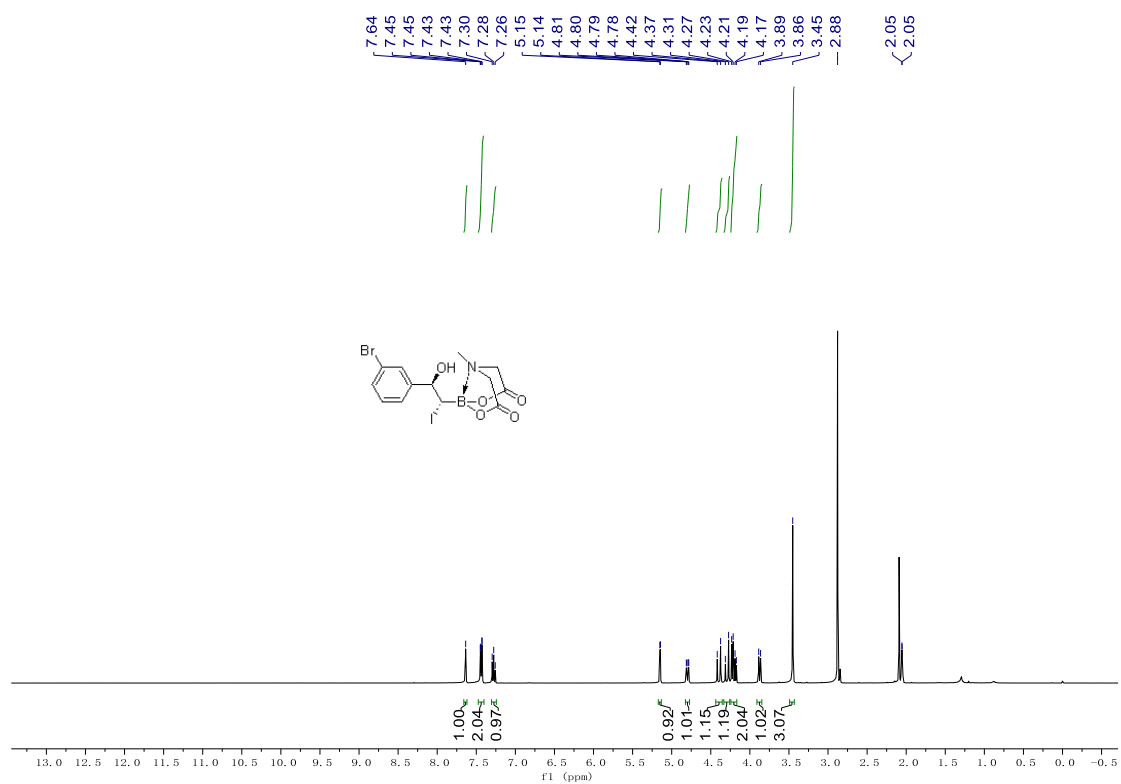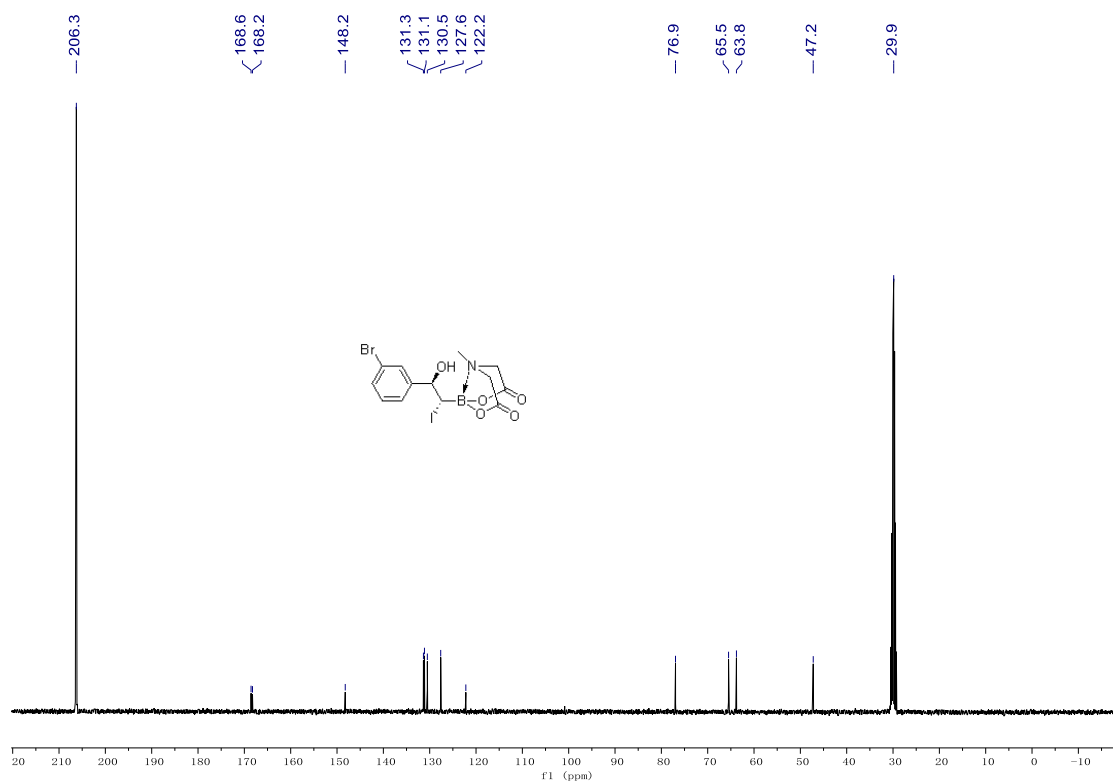

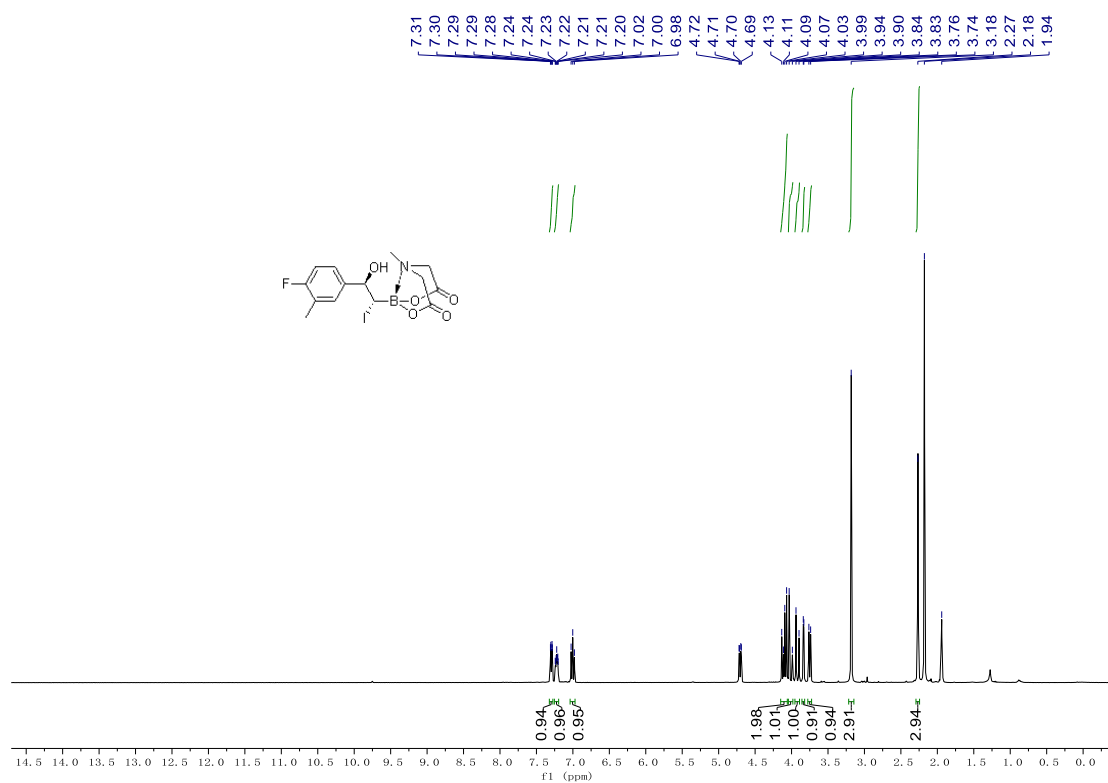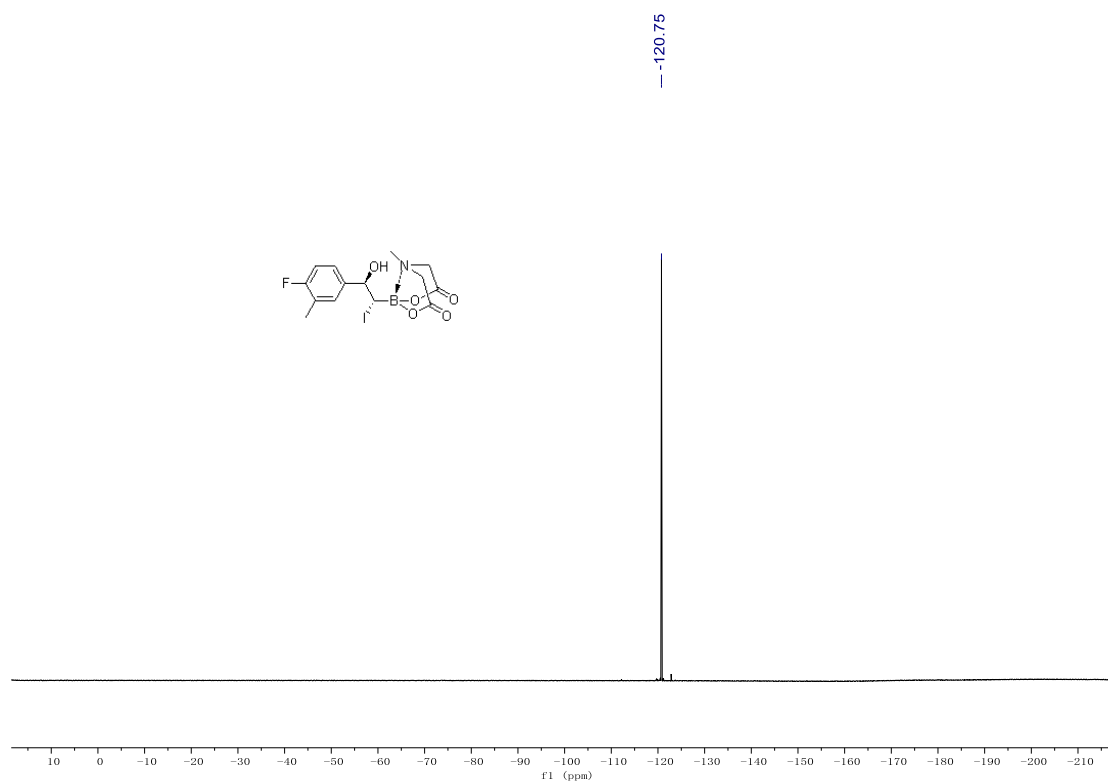

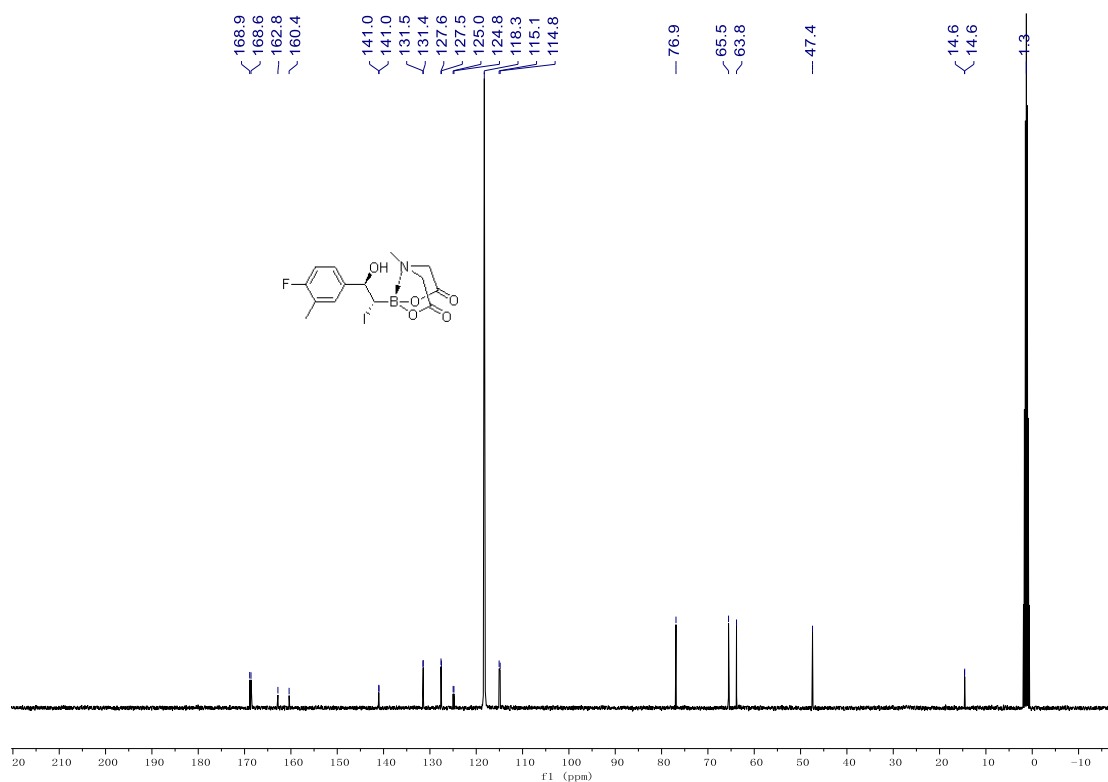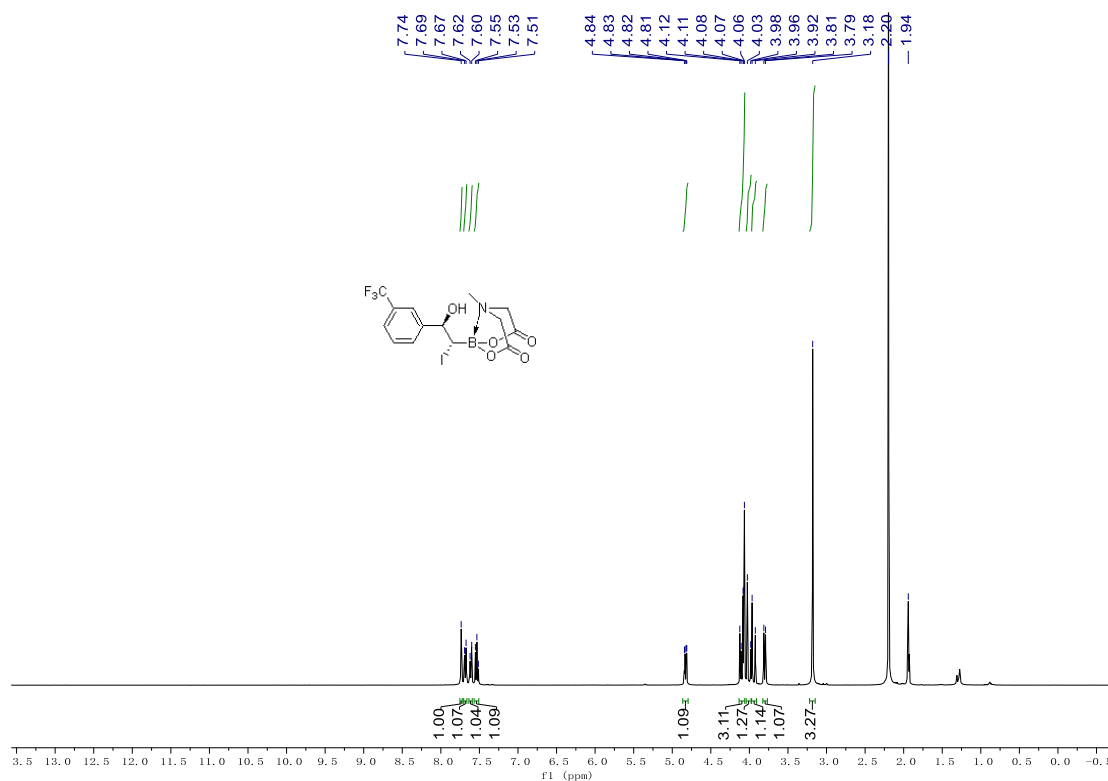

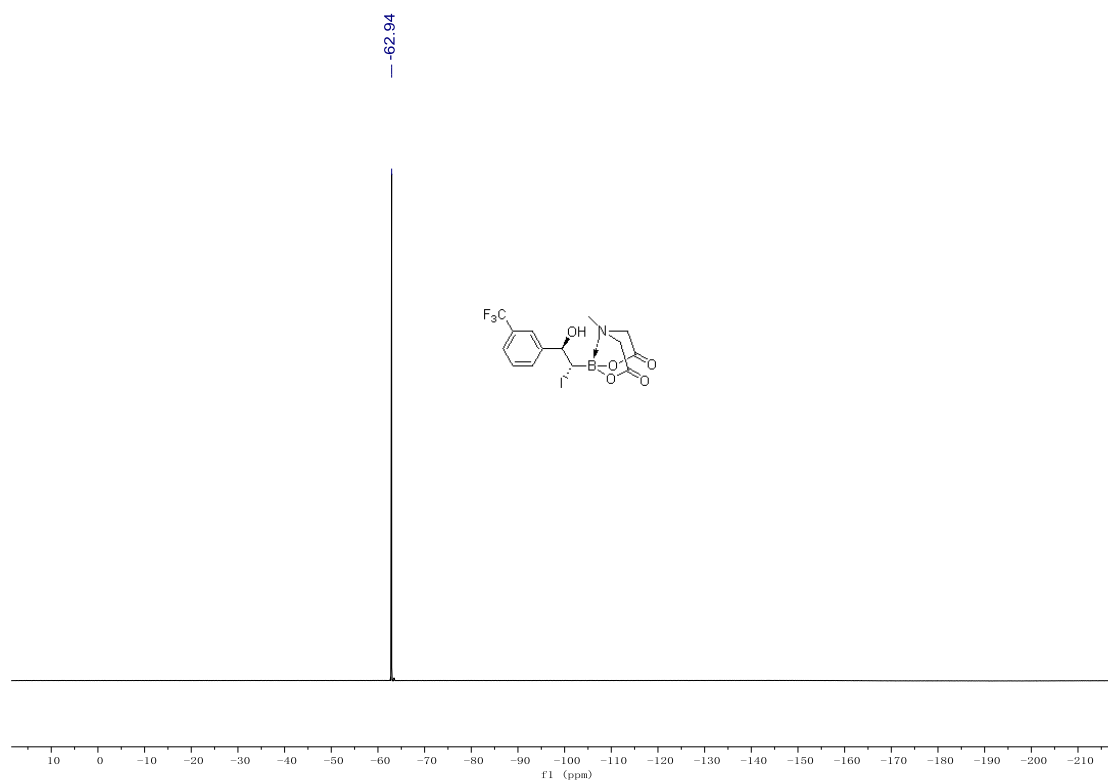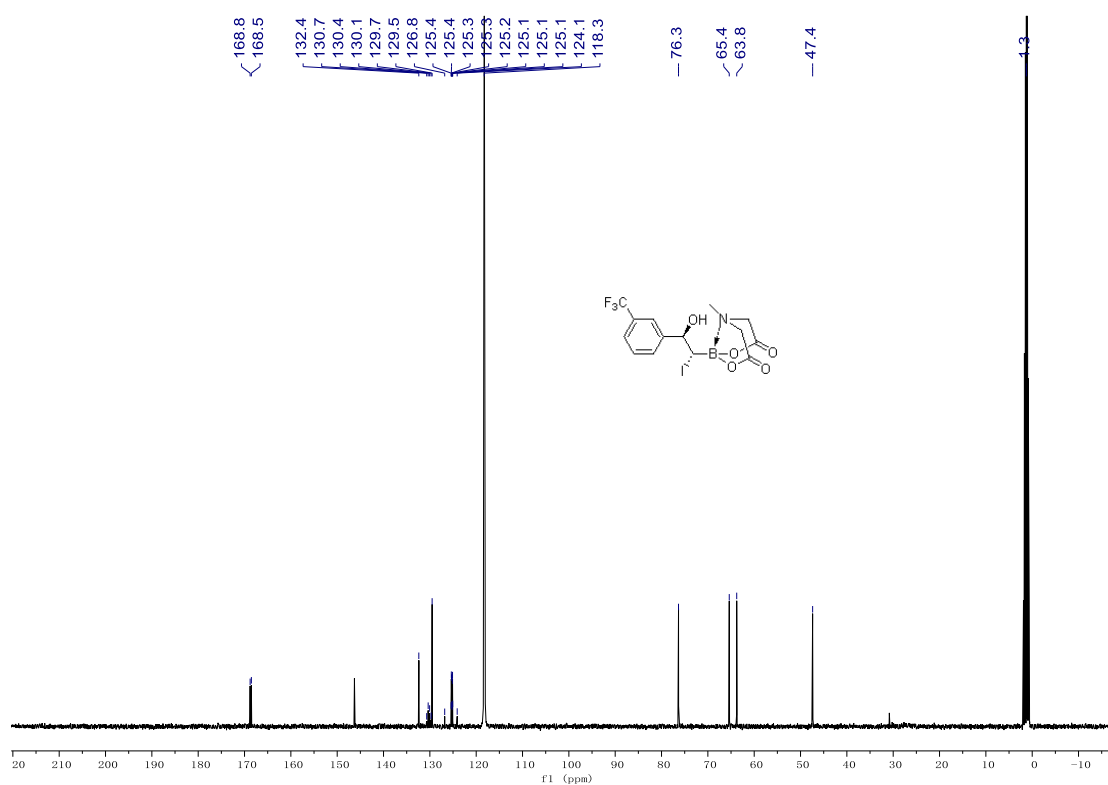



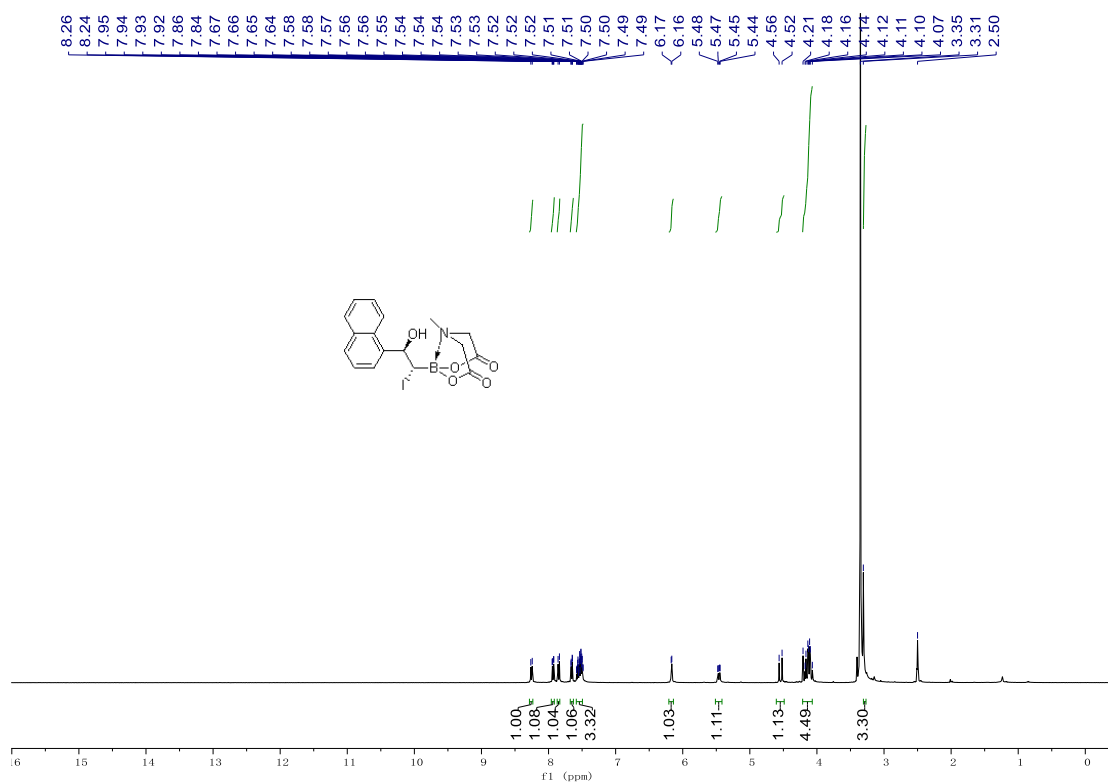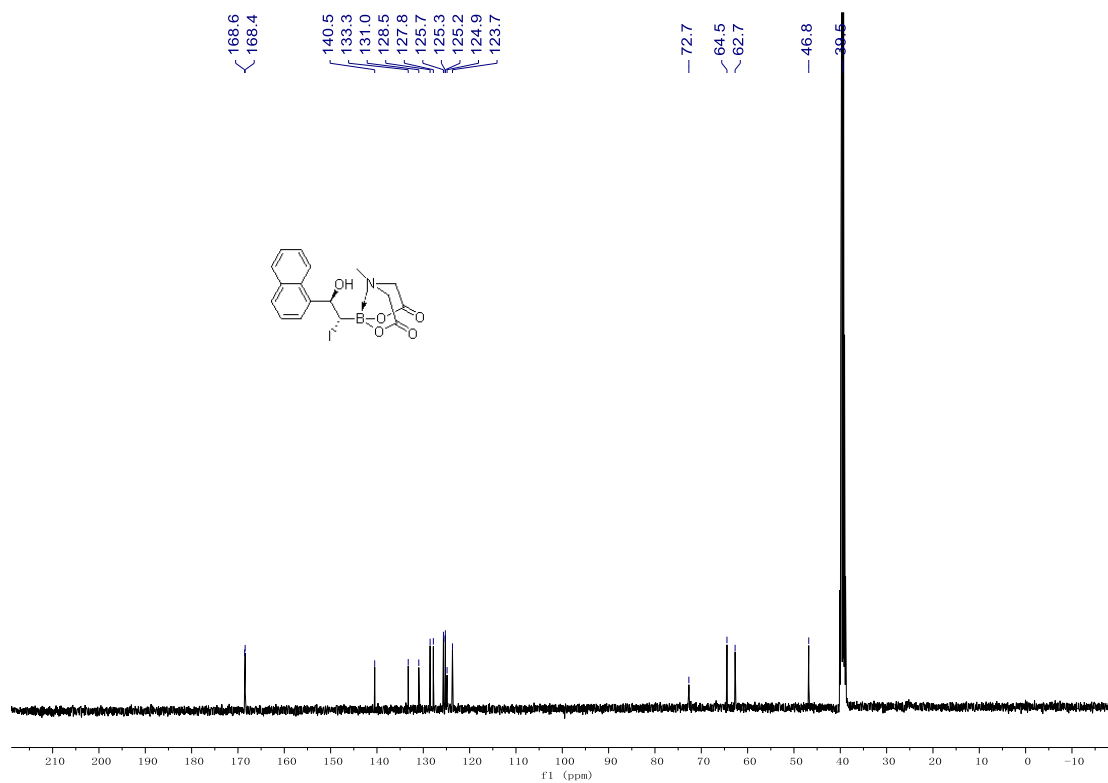

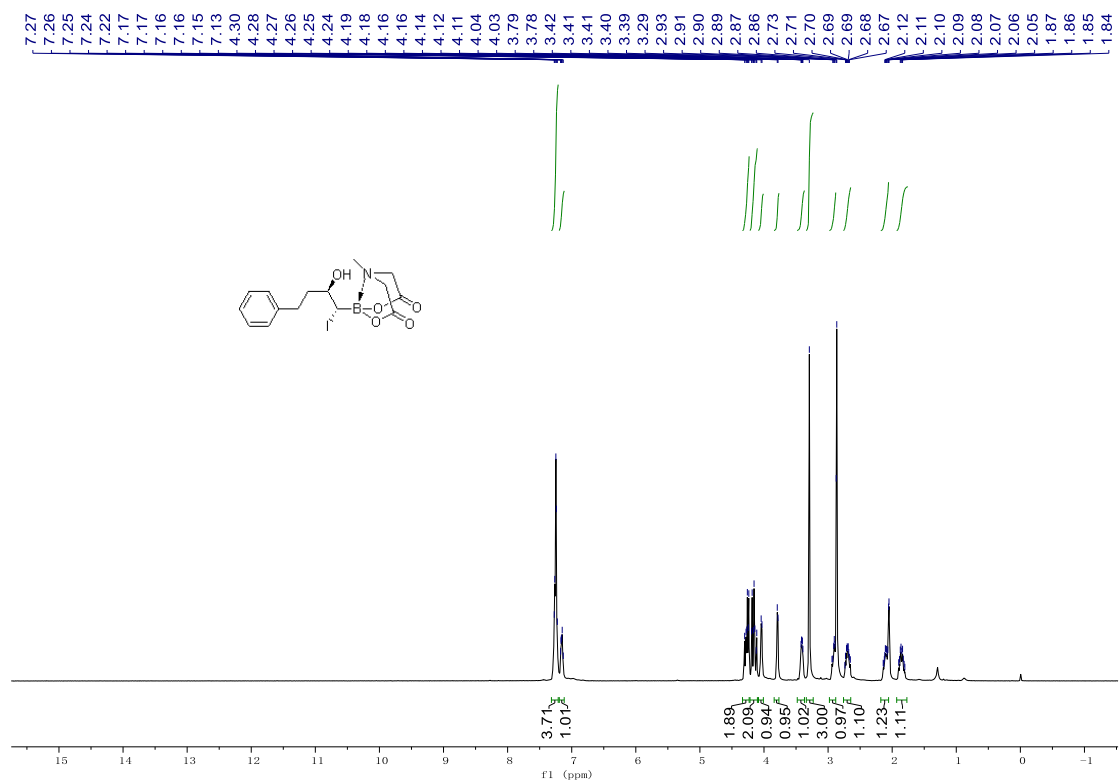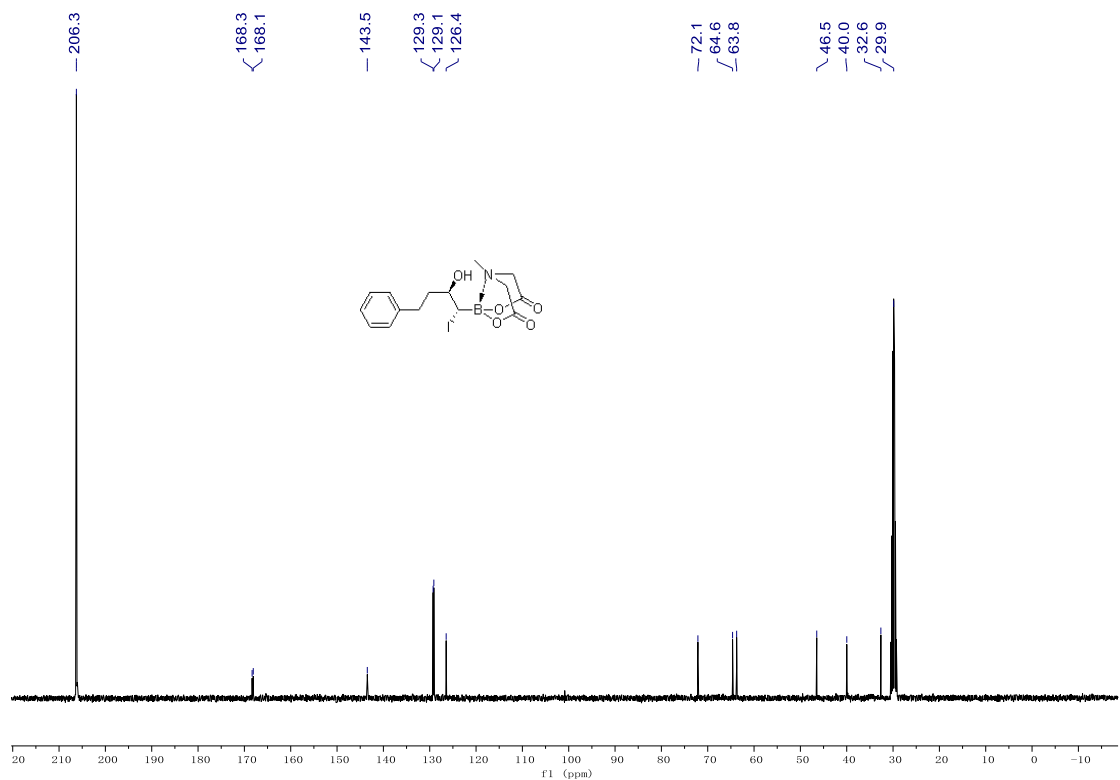

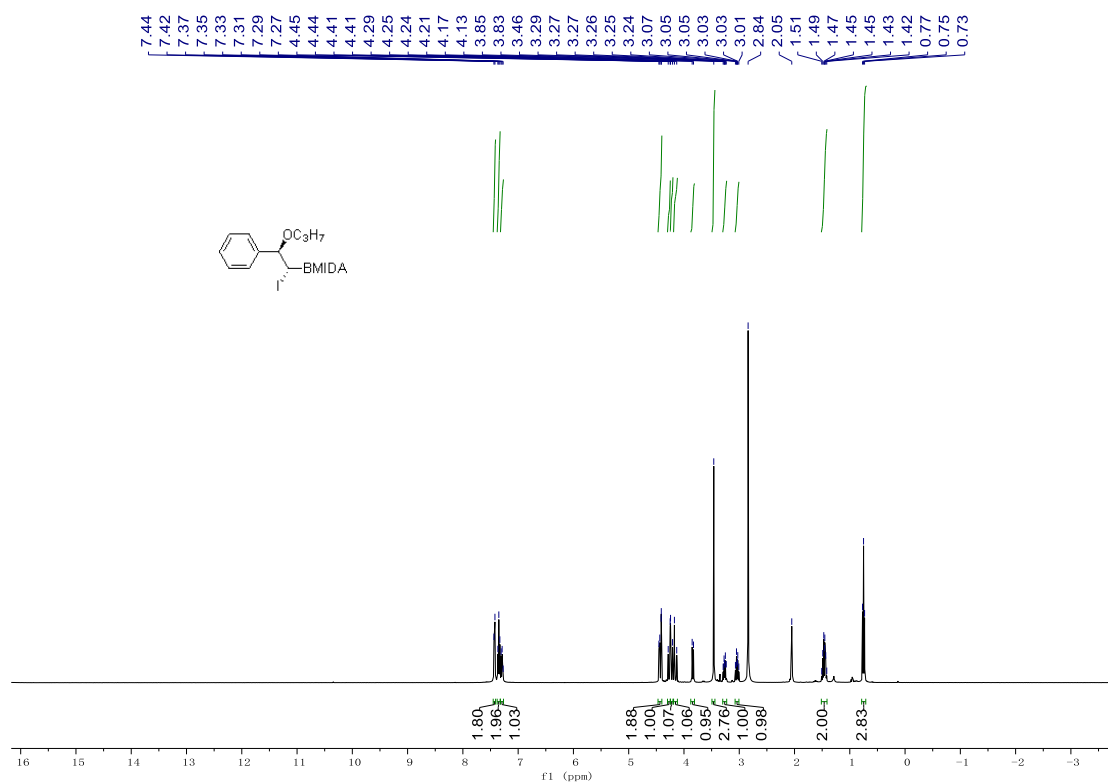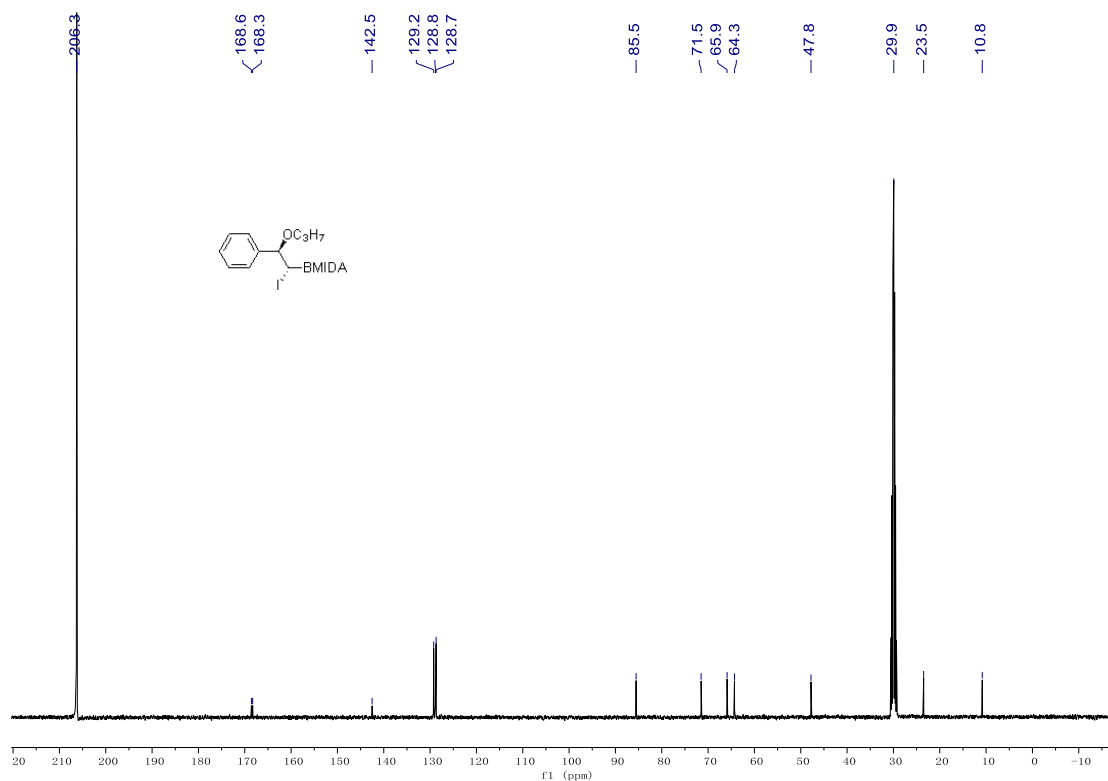

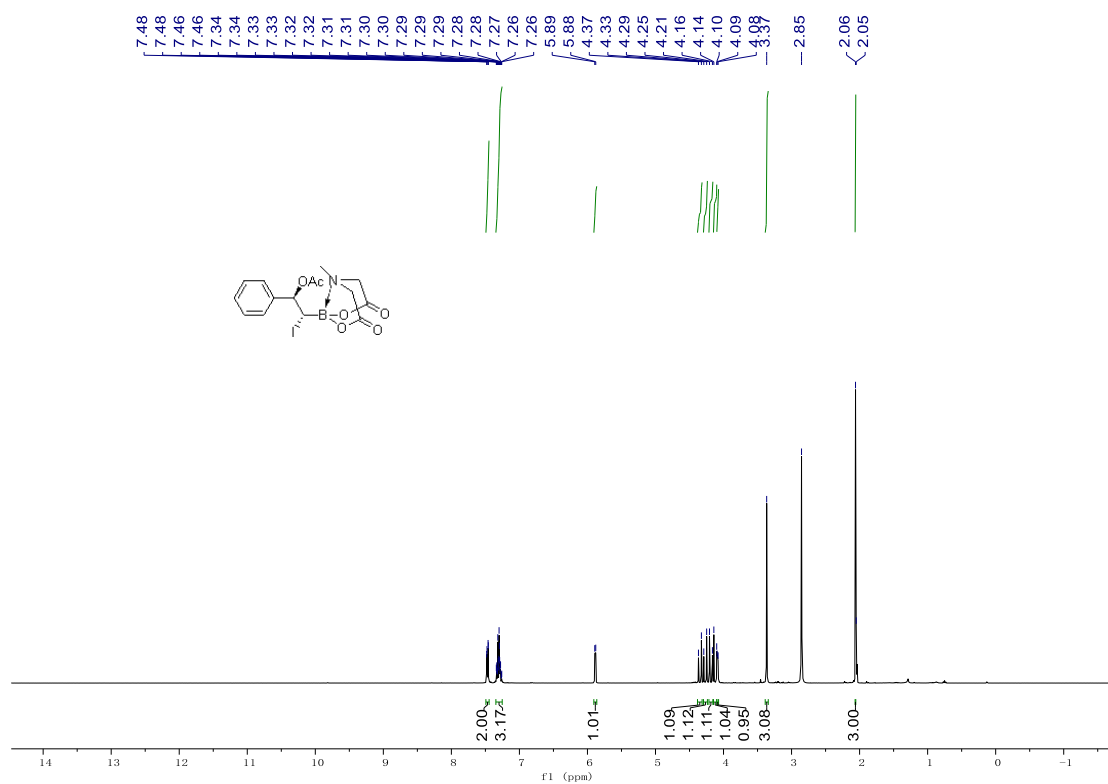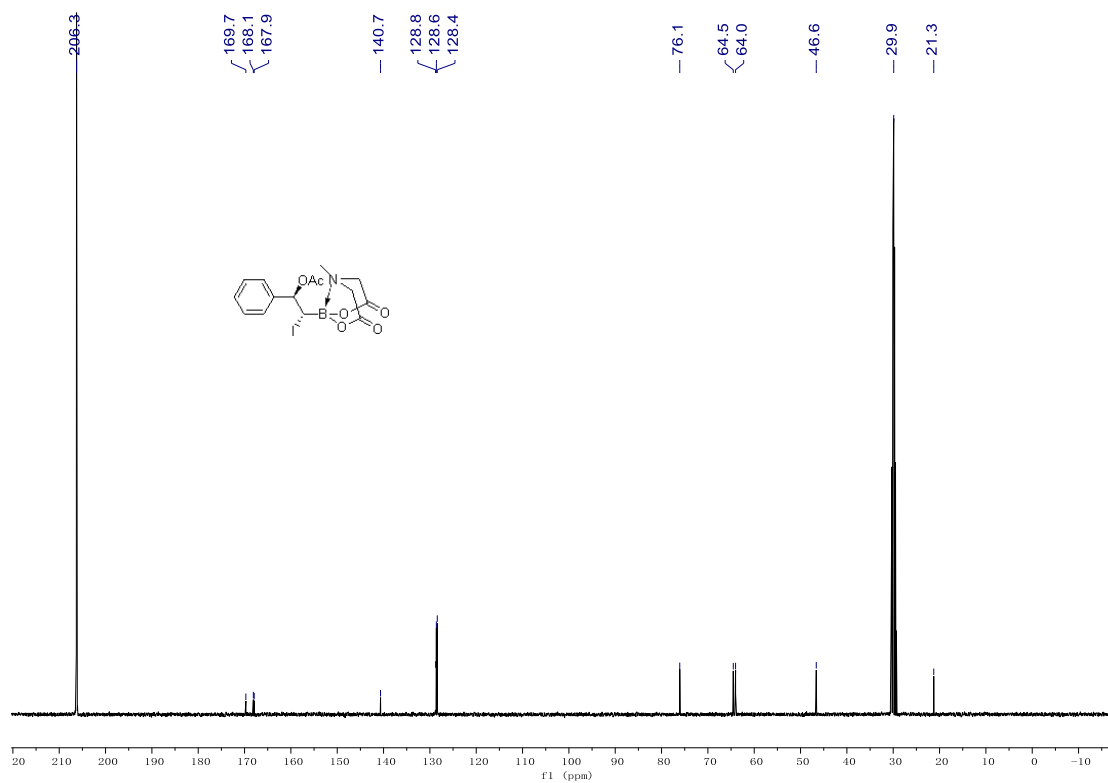

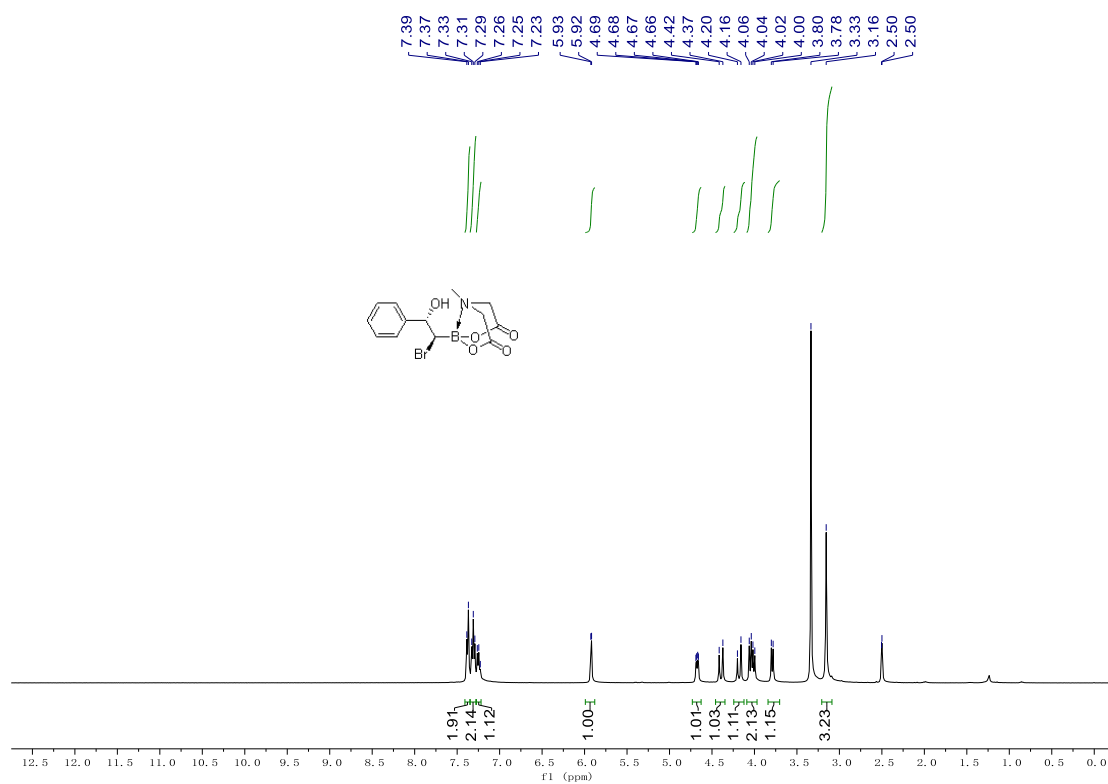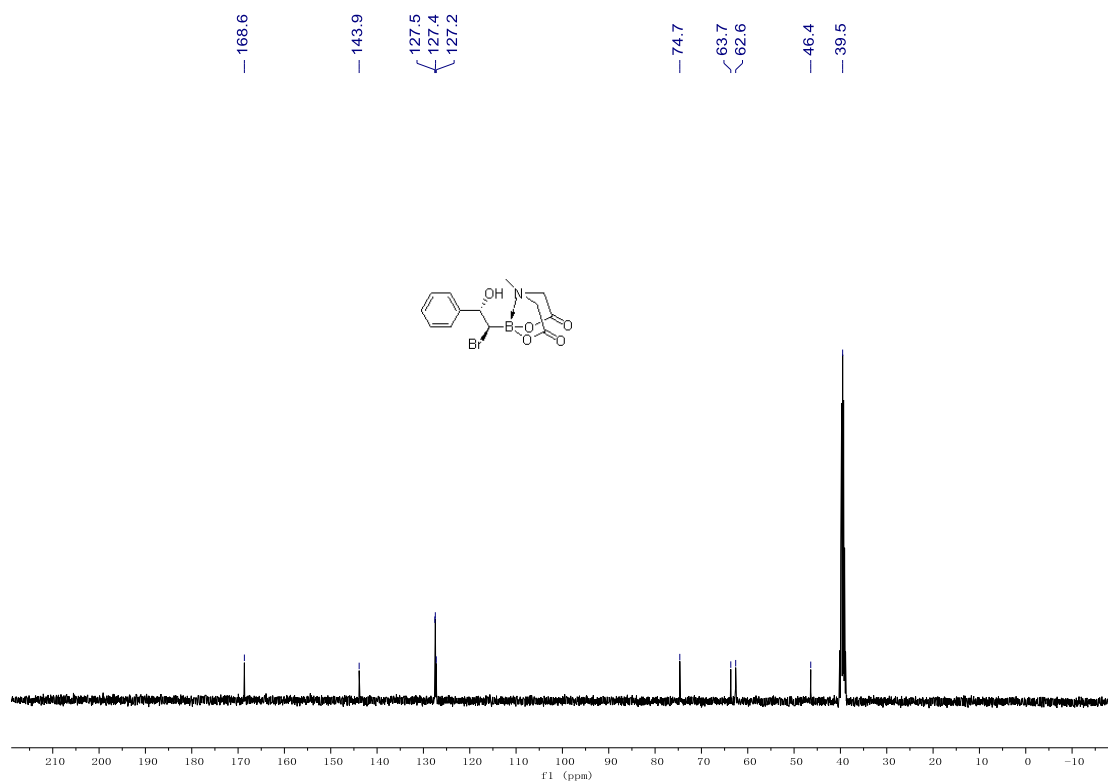

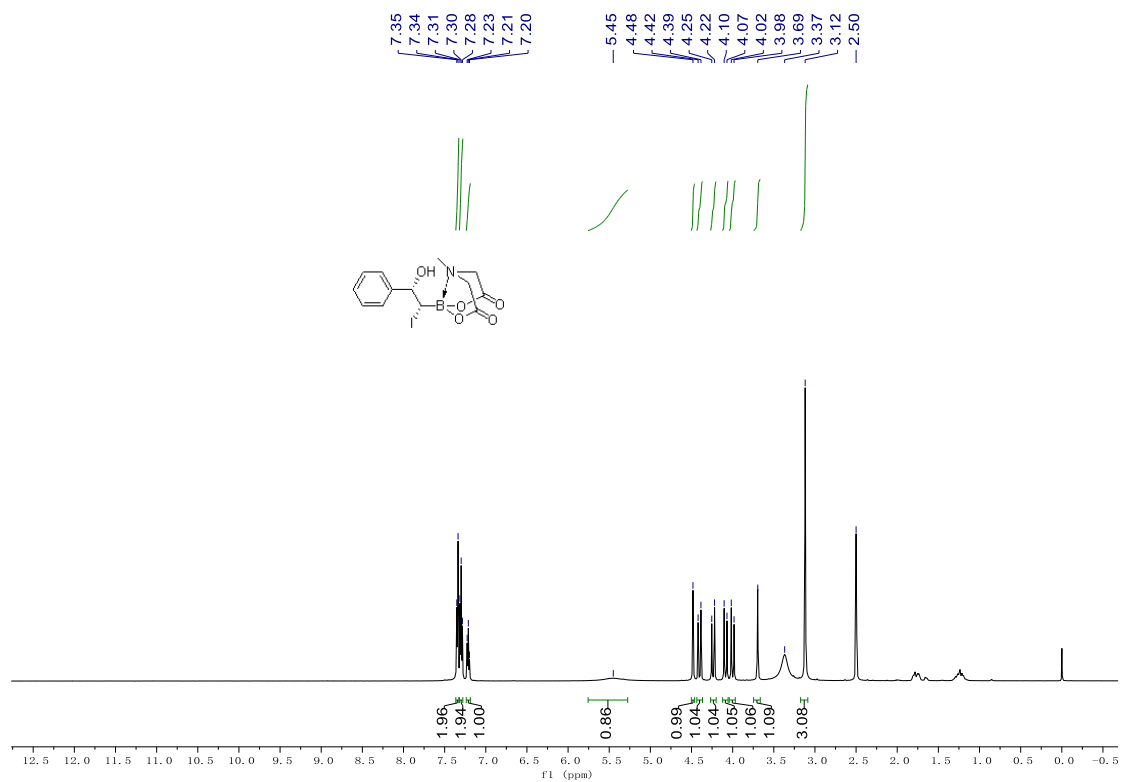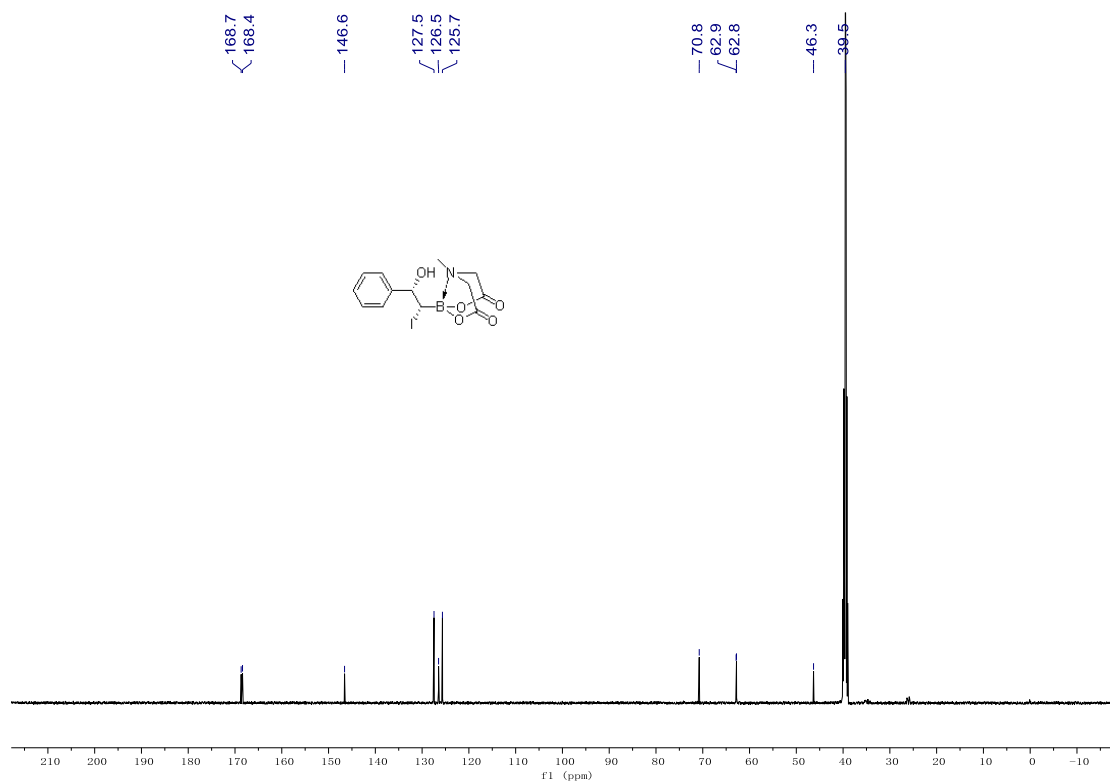

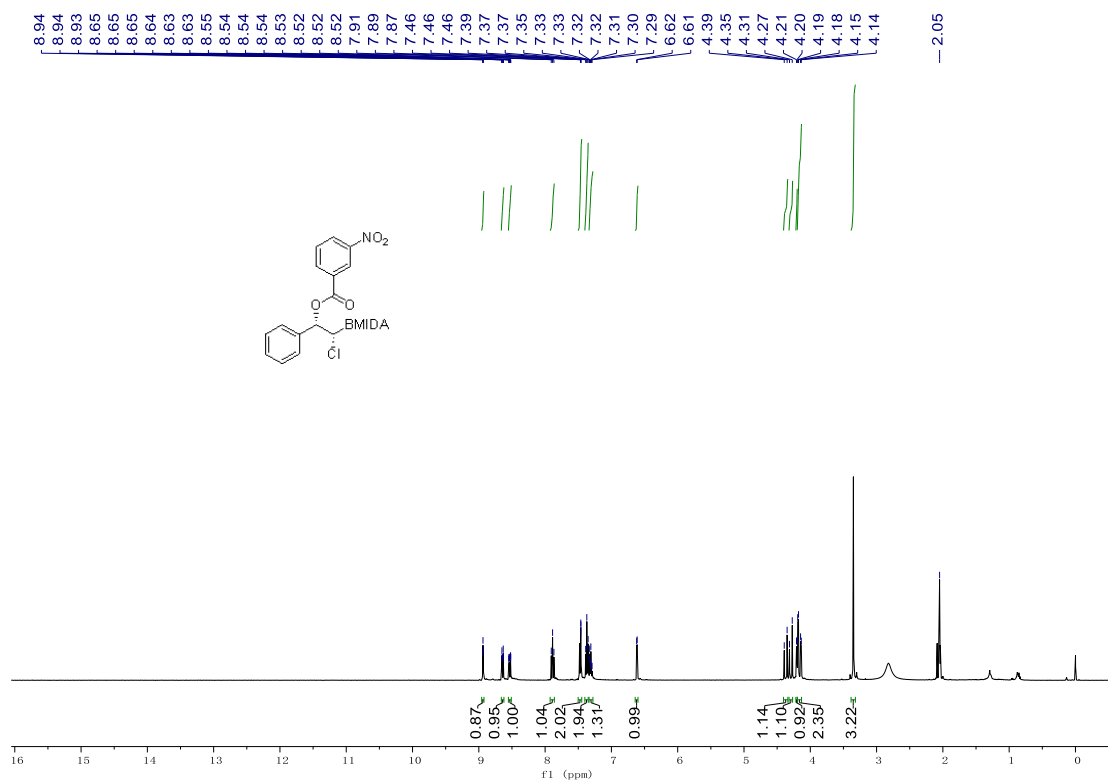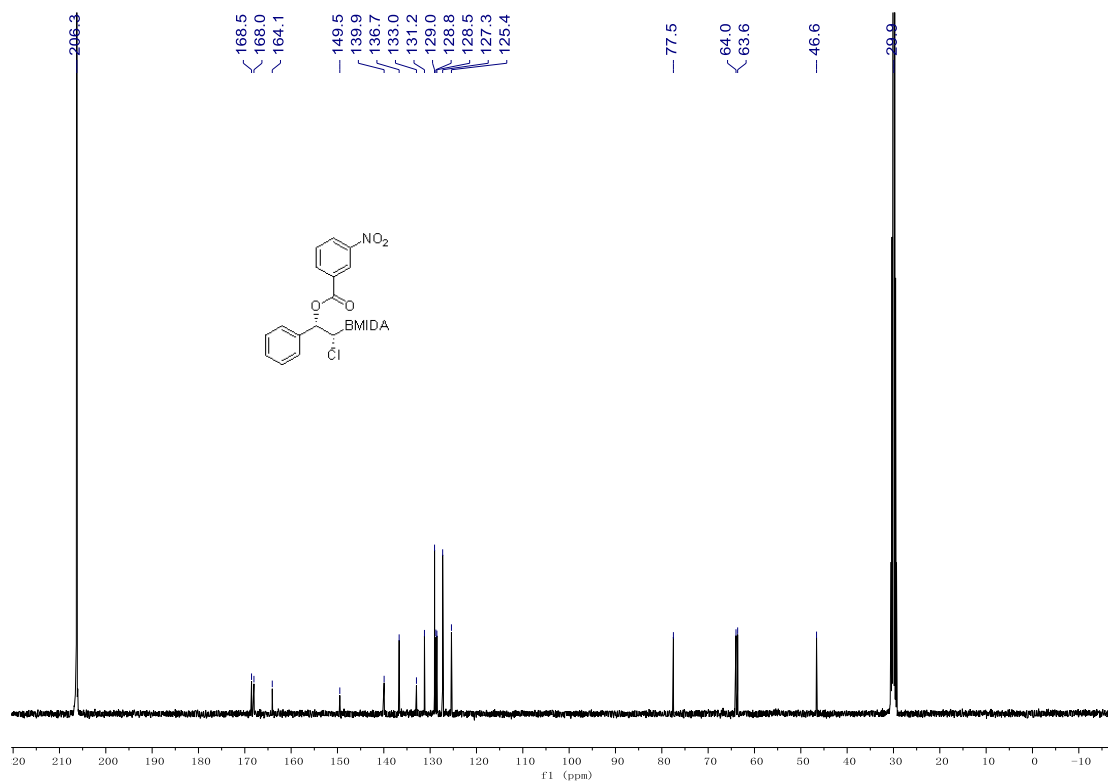

Supplement: d0cc00722f1.pdf [file d0cc00722f1.pdf]
